# Supplementary material
Source: publisher figshare collection journal article supplement (https://acs.figshare.com/ndownloader/files/4064668)

**Supporting Information for**

**Asymmetric Syntheses of**

**(-)-1-Deoxymannojirimycin and (+)-1-Deoxyallonojirimycin**

**via a Ring-Expansion Approach**

Stephen G. Davies,\* Aude L. A. Figuccia, Ai M. Fletcher,  
Paul M. Roberts and James E. Thomson

*Department of Chemistry, Chemistry Research Laboratory,  
University of Oxford, Mansfield Road, Oxford, OX1 3TA, U.K.*

steve.davies@chem.ox.ac.uk

**Table of Contents**

|                                                       |       |
|-------------------------------------------------------|-------|
| 1. Experimental                                       | 2–14  |
| 2. X-ray crystal structure determination              | 15    |
| 3. Copies of $^1\text{H}$ and $^{13}\text{C}$ spectra | 16–43 |

## 1. Experimental

### 1.1. General Experimental

All reactions involving organometallic or other moisture sensitive reagents were carried out under a nitrogen or argon atmosphere using standard vacuum line techniques and glassware that was flame dried and cooled under nitrogen before use. Solvents were dried according to the procedure outlined by Grubbs and co-workers.<sup>1</sup> Water was purified by an Elix<sup>®</sup> UV-10 system. BuLi was purchased as a solution in hexanes and titrated against diphenylacetic acid before use. All other reagents were used as supplied without prior purification. Organic layers were dried over MgSO<sub>4</sub>. Thin layer chromatography was performed on aluminium plates coated with 60 F<sub>254</sub> silica. Plates were visualised using UV light (254 nm), iodine, 1% aq KMnO<sub>4</sub>, or 10% ethanolic phosphomolybdic acid. Flash column chromatography was performed on Kieselgel 60 silica.

Melting points are uncorrected. Optical rotations were recorded in a water-jacketed 10 cm cell. Specific rotations are reported in 10<sup>-1</sup> deg cm<sup>2</sup> g<sup>-1</sup> and concentrations in g/100 mL. IR spectra were recorded using an ATR module. Selected characteristic peaks are reported in cm<sup>-1</sup>. NMR spectra were recorded in the deuterated solvent stated. Spectra were recorded at rt. The field was locked by external referencing to the relevant deuterium resonance. <sup>1</sup>H-<sup>1</sup>H COSY, <sup>1</sup>H-<sup>13</sup>C HMQC, and <sup>1</sup>H-<sup>13</sup>C HMBC analyses were used to establish atom connectivity. Accurate mass measurements were run on a TOF spectrometer internally calibrated with polyalanine.

---

<sup>1</sup> Pangborn, A. B.; Giardello, M. A.; Grubbs, R. H.; Rosen, R. K.; Timmers, F. J. *Organometallics* **1996**, *15*, 1518.

## 1.2. Experimental Data

### (*R,R,R,R*)- and (*3S,4R,5R,αR*)-4-Benzyl-5-[*N*-benzyl-*N*-(*α*-methylbenzyl)amino]-6-(triisopropylsilyloxy)hex-1-en-3-ol **11** and **12**

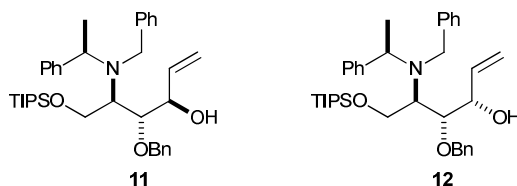

*Step 1:* DMSO (1.11 mL, 15.7 mmol) was added dropwise to a stirred solution of (COCl)<sub>2</sub> (0.55 mL, 6.41 mmol) in CH<sub>2</sub>Cl<sub>2</sub> (50 mL) at −78 °C. After 20 min, a solution of **10**<sup>2</sup> (2.00 g, 3.56 mmol, >99:1 dr) in CH<sub>2</sub>Cl<sub>2</sub> (50 mL) at −78 °C was added dropwise via cannula. After a further 30 min, Et<sub>3</sub>N (2.98 mL, 21.4 mmol) was added and the resultant mixture was stirred at −78 °C for 30 min before being allowed to warm to rt over a period of 30 min. The reaction mixture was then concentrated *in vacuo* and the residue was partitioned between H<sub>2</sub>O (100 mL) and Et<sub>2</sub>O (100 mL). The aqueous layer was extracted with Et<sub>2</sub>O (2 × 50 mL) and the combined organic extracts were then dried and concentrated *in vacuo* to give (*R,R,R*)-2-benzyl-3-[*N*-benzyl-*N*-(*α*-methylbenzyl)amino]-4-(triisopropylsilyloxy)butanal as a yellow oil (1.85 g, >99:1 dr);<sup>3</sup> δ<sub>H</sub> (400 MHz, CDCl<sub>3</sub>) 1.01–1.12 (21H, m, Si(CHMe<sub>2</sub>)<sub>3</sub>), 1.38 (3H, d, *J* 7.1, C(α)Me), 3.45–3.51 (1H, m, C(3)H), 3.56 (1H, dd, *J* 4.0, 2.7, C(2)H), 3.78 (1H, d, *J* 14.8, NCH<sub>A</sub>H<sub>B</sub>Ph), 3.81–3.92 (2H, m, C(4)H<sub>A</sub>, C(α)H), 4.06 (1H, dd, *J* 9.6, 7.6, C(4)H<sub>B</sub>), 4.12 (1H, d, *J* 14.8, NCH<sub>A</sub>H<sub>B</sub>Ph), 4.34 (1H, d, *J* 11.4, OCH<sub>A</sub>H<sub>B</sub>Ph), 4.48 (1H, d, *J* 11.4, OCH<sub>A</sub>H<sub>B</sub>Ph), 7.16–7.40 (15H, m, *Ph*), 9.19 (1H, d, *J* 2.7, C(1)H).

*Step 2:* Vinylmagnesium bromide (1.0 M in THF, 9.90 mL, 9.90 mmol) was added dropwise to a stirred solution of the residue (1.85 g, >99:1 dr) in THF (100 mL) at 0 °C. The reaction mixture was allowed to warm to rt and was stirred at rt for 16 h. The reaction mixture was then cooled to 0 °C and H<sub>2</sub>O (2.5 mL) was added dropwise. The resultant mixture was concentrated *in vacuo* and the residue was partitioned between H<sub>2</sub>O (100 mL) and EtOAc (100 mL). The aqueous layer was extracted with EtOAc (2 × 50 mL) and the combined organic extracts were washed with brine (100 mL), then dried and concentrated *in vacuo* to give a 65:35 mixture of **11** and **12**. Purification via flash column chromatography (eluent 30–40 °C petrol/EtOAc, 25:1) gave **11** as a colourless oil (1.06 g, 55% from **10**, >99:1 dr); [α]<sub>D</sub><sup>20</sup> +36.5 (*c* 1.0 in CHCl<sub>3</sub>); ν<sub>max</sub> (ATR) 3370 (O–H), 2942, 2866 (C–H); δ<sub>H</sub> (400 MHz, CDCl<sub>3</sub>) 1.05–1.14 (21H, m, Si(CHMe<sub>2</sub>)<sub>3</sub>), 1.45 (3H, d, *J* 6.8,

<sup>2</sup> For the preparation of the antipode (*S,S,S*)-**10**, see: Abraham, E.; Brock, E. A.; Candela-Lena, J. I.; Davies, S. G.; Georgiou, M.; Nicholson, R. L.; Perkins, J. H.; Roberts, P. M.; Russell, A. J.; Sánchez-Fernández, E. M.; Scott, P. M.; Smith, A. D.; Thomson, J. E. *Org. Biomol. Chem.* **2008**, *6*, 1665.

<sup>3</sup> Abraham, E.; Davies, Brock, E. A.; Candela-Lena, J. I., Davies, S. G.; Georgiou, M.; Nicholson, R. L.; Perkins, J. H.; Roberts, P. M.; Russell, A. J.; Sanchez-Fernandez, E. M.; Scott, P. M.; Smith, A. D.; Thomson, J. E. *Org. Biomol. Chem.* **2008**, *6*, 1665.

C( $\alpha$ )Me), 3.18 (1H, d,  $J$  7.0, OH), 3.23 (1H, dd,  $J$  7.8, 2.3, C(4) $H$ ), 3.38–3.49 (1H, m, C(5) $H$ ), 3.96 (2H, app s, NCH<sub>2</sub>Ph), 3.97–4.04 (1H, m, C(6) $H_A$ ), 4.05–4.19 (2H, m, C(6) $H_B$ , C( $\alpha$ ) $H$ ), 4.29 (1H, d,  $J$  11.3, OCH<sub>A</sub>H<sub>B</sub>Ph), 4.46 (1H, br s, C(3) $H$ ), 4.51 (1H, d,  $J$  11.3, OCH<sub>A</sub>H<sub>B</sub>Ph), 5.04 (1H, dd,  $J$  10.5, 1.6, C(1) $H_A$ ), 5.24 (1H, dd,  $J$  17.2, 1.6, C(1) $H_B$ ), 5.58 (1H, ddd,  $J$  17.2, 10.6, 4.6, C(2) $H$ ), 7.14–7.44 (15H, m,  $Ph$ );  $\delta_C$  (100 MHz, CDCl<sub>3</sub>) 12.1 (Si(CHMe<sub>2</sub>)<sub>3</sub>), 18.2 (Si(CHMe<sub>2</sub>)<sub>3</sub>), 19.5 (C( $\alpha$ )Me), 52.0 (NCH<sub>2</sub>Ph), 59.2 (C(5)), 60.5 (C( $\alpha$ )), 62.7 (C(6)), 71.9 (C(3)), 74.0 (OCH<sub>2</sub>Ph), 80.7 (C(4)), 114.6 (C(1)), 126.8, 126.9, 127.6, 127.8, 127.9, 128.2, 128.3, 128.9 (*o,m,p-Ph*), 138.2 (*i-Ph*), 139.6 (C(2)), 141.4, 145.6 (*i-Ph*);  $m/z$  (ESI<sup>+</sup>) 588 ([M+H]<sup>+</sup>, 100%); HRMS (ESI<sup>+</sup>) C<sub>37</sub>H<sub>54</sub>NO<sub>3</sub>Si<sup>+</sup> ([M+H]<sup>+</sup>) requires 588.3867; found 588.3857. Further elution gave **12** as a colourless oil (490 mg, 26% from **10**, >99:1 dr);  $[\alpha]_D^{20}$  +2.4 (c 1.0 in CHCl<sub>3</sub>);  $\nu_{max}$  (ATR) 3376 (O–H), 2942, 2866 (C–H);  $\delta_H$  (400 MHz, CDCl<sub>3</sub>) 1.03–1.18 (21H, m, Si(CHMe<sub>2</sub>)<sub>3</sub>), 1.34 (3H, d,  $J$  6.7, C( $\alpha$ )Me), 3.20–3.26 (1H, m, C(5) $H$ ), 3.52 (1H, app t,  $J$  4.4, C(4) $H$ ), 3.88–4.01 (3H, m, NCH<sub>2</sub>Ph, C(6) $H_A$ ), 4.06 (1H, q,  $J$  6.7, C( $\alpha$ ) $H$ ), 4.12–4.20 (1H, m, C(6) $H_B$ ), 4.24 (1H, br s, C(3) $H$ ), 4.38 (1H, d,  $J$  11.1, OCH<sub>A</sub>H<sub>B</sub>Ph), 4.67 (1H, d,  $J$  11.1, OCH<sub>A</sub>H<sub>B</sub>Ph), 4.95 (1H, app d,  $J$  10.4, C(1) $H_A$ ), 5.02 (1H, br s, OH), 5.18 (1H, app d,  $J$  17.1, C(1) $H_B$ ), 5.43–5.54 (1H, m, C(2) $H$ ), 7.15–7.36 (15H, m,  $Ph$ );  $\delta_C$  (100 MHz, CDCl<sub>3</sub>) 12.0 (Si(CHMe<sub>2</sub>)<sub>3</sub>), 18.0 (Si(CHMe<sub>2</sub>)<sub>3</sub>), 18.7 (C( $\alpha$ )Me), 51.7 (NCH<sub>2</sub>Ph), 59.1 (C( $\alpha$ )), 59.3 (C(5)), 61.8 (C(6)), 71.7 (OCH<sub>2</sub>Ph), 72.4 (C(3)), 82.1 (C(4)), 115.6 (C(1)), 126.7, 126.8, 127.5, 127.8, 128.2, 128.7 (*o,m,p-Ph*), 138.1 (C(2)), 138.3, 141.3, 144.8 (*i-Ph*);  $m/z$  (ESI<sup>+</sup>) 588 ([M+H]<sup>+</sup>, 100%); HRMS (ESI<sup>+</sup>) C<sub>37</sub>H<sub>54</sub>NO<sub>3</sub>Si<sup>+</sup> ([M+H]<sup>+</sup>) requires 588.3867; found 588.3847.

**(*R,R,R,R*)-4-Benzyl-5-[*N*-benzyl-*N*-( $\alpha$ -methylbenzyl)amino]hex-1-en-3,6-diol **13****

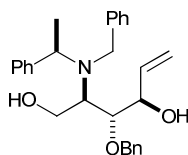

TBAF (1.0 M in THF, 2.49 mL, 2.49 mmol) was added dropwise to a stirred solution of **11** (978 mg, 1.66 mmol, >99:1 dr) in THF (80 mL) at 0 °C. The resultant mixture was allowed to warm to rt and was stirred at rt for 16 h. The reaction mixture was then concentrated *in vacuo* and the residue was partitioned between H<sub>2</sub>O (100 mL) and CH<sub>2</sub>Cl<sub>2</sub> (100 mL). The aqueous layer was extracted with CH<sub>2</sub>Cl<sub>2</sub> (2 × 50 mL) and the combined organic extracts were then dried and concentrated *in vacuo*. Purification via flash column chromatography (eluent 30–40 °C petrol/ EtOAc, 6:1) gave **13** as a white solid (555 mg, 77%, >99:1 dr);  $[\alpha]_D^{20}$  +105.6 (c 1.0 in CHCl<sub>3</sub>);  $\nu_{max}$  (ATR) 3409 (O–H), 2931 (C–H);  $\delta_H$  (400 MHz, CDCl<sub>3</sub>) 1.46 (3H, d,  $J$  6.8, C( $\alpha$ )Me), 2.61 (1H, br s, OH), 2.91 (1H, br s, OH), 3.20–3.27 (1H, m, C(5) $H$ ), 3.45–3.50 (1H, m, C(4) $H$ ), 3.72–3.85 (3H, m, C(6) $H_2$ , NCH<sub>A</sub>H<sub>B</sub>Ph), 3.89 (1H, d,  $J$  14.1, NCH<sub>A</sub>H<sub>B</sub>Ph), 4.01 (1H, q,  $J$  6.8, C( $\alpha$ ) $H$ ), 4.26 (1H, br s, C(3) $H$ ), 4.39 (1H, d,  $J$  11.4, OCH<sub>A</sub>H<sub>B</sub>Ph), 4.60 (1H, d,  $J$  11.4, OCH<sub>A</sub>H<sub>B</sub>Ph), 5.06 (1H, app dt,  $J$  10.6, 1.5, C(1) $H_A$ ),

5.20 (1H, app d,  $J$  17.1, C(1) $H_B$ ), 5.52 (1H, ddd,  $J$  17.1, 10.6, 4.7, C(2) $H$ ), 7.20–7.37 (15H, m,  $Ph$ );  $\delta_C$  (100 MHz,  $CDCl_3$ ) 16.9 (C( $\alpha$ ) $Me$ ), 50.6 (NCH<sub>2</sub>Ph), 58.3 (C( $\alpha$ )), 59.3 (C(5)), 61.9 (C(6)), 71.9 (C(3)), 74.0 (OCH<sub>2</sub>Ph), 81.5 (C(4)), 115.2 (C(1)), 127.3, 127.5, 128.1, 128.2, 128.2, 128.2, 128.5, 128.6, 129.0 (*o,m,p-Ph*), 137.3, 140.1, 142.8 (*i-Ph*), 138.6 (C(2));  $m/z$  (ESI<sup>+</sup>) 432 ([M+H]<sup>+</sup>, 100%); HRMS (ESI<sup>+</sup>) C<sub>28</sub>H<sub>34</sub>NO<sub>3</sub><sup>+</sup> ([M+H]<sup>+</sup>) requires 432.2533; found 432.2522.

**(*R,R,R,R*)-*N*(1)-Benzyl-2-[(triisopropylsilyloxy)methyl]-3-benzyloxy-4-hydroxy-5-(iodomethyl)pyrrolidine 14**

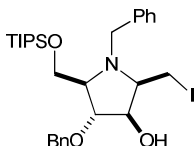

I<sub>2</sub> (518 mg, 2.04 mmol) and NaHCO<sub>3</sub> (171 mg, 2.04 mmol) were added to a stirred solution of **11** (400 mg, 0.68 mmol, >99:1 dr) in MeCN (20 mL) at rt and the resultant mixture was stirred at rt for 16 h. The reaction mixture was then diluted with Et<sub>2</sub>O (50 mL), washed with satd aq Na<sub>2</sub>S<sub>2</sub>O<sub>3</sub> (50 mL) and the organic layer was dried and concentrated *in vacuo*. Purification via flash column chromatography (eluent 30–40 °C petrol/EtOAc, 50:1) gave **14** as a yellow oil (83 mg, 20%, >99:1 dr);  $[\alpha]_D^{20}$  +50.7 ( $c$  1.0 in CHCl<sub>3</sub>);  $\nu_{max}$  (ATR) 3384 (O–H), 2942, 2866 (C–H);  $\delta_H$  (400 MHz,  $CDCl_3$ ) 0.95–1.04 (21H, m, Si(CHMe<sub>2</sub>)<sub>3</sub>), 3.11 (1H, dd,  $J$  8.9, 3.1, CH<sub>A</sub>H<sub>B</sub>I), 3.19 (1H, m, C(2) $H$ ), 3.22–3.28 (1H, m, C(2)CH<sub>A</sub>H<sub>B</sub>), 3.30 (1H, d,  $J$  8.9, CH<sub>A</sub>H<sub>B</sub>I), 3.40 (1H, app dt,  $J$  11.1, 3.1, C(5) $H$ ), 3.48 (1H, d,  $J$  10.4, C(2)CH<sub>A</sub>H<sub>B</sub>), 3.68 (1H, d,  $J$  14.0, NCH<sub>A</sub>H<sub>B</sub>Ph), 3.86 (1H, app s, C(3) $H$ ), 3.95–4.02 (2H, m, NCH<sub>A</sub>H<sub>B</sub>Ph, OH), 4.23 (1H, dd,  $J$  11.1, 3.2, C(4) $H$ ), 4.53 (1H, d,  $J$  12.0, OCH<sub>A</sub>H<sub>B</sub>Ph), 4.66 (1H, d,  $J$  12.0, OCH<sub>A</sub>H<sub>B</sub>Ph), 7.22–7.40 (10H, m,  $Ph$ );  $\delta_C$  (100 MHz,  $CDCl_3$ ) 3.4 (CH<sub>2</sub>I), 11.8 (Si(CHMe<sub>2</sub>)<sub>3</sub>), 17.8 (Si(CHMe<sub>2</sub>)<sub>3</sub>), 58.8 (NCH<sub>2</sub>Ph), 64.5 (C(2)CH<sub>2</sub>), 70.0 (C(5)), 71.2 (OCH<sub>2</sub>Ph), 74.0 (C(4)), 74.3 (C(2)), 84.7 (C(3)), 127.2, 127.6, 127.7, 128.3, 128.4, 128.6 (*o,m,p-Ph*), 138.0, 139.7 (*i-Ph*);  $m/z$  (ESI<sup>+</sup>) 610 ([M+H]<sup>+</sup>, 100%); HRMS (ESI<sup>+</sup>) C<sub>29</sub>H<sub>45</sub>INO<sub>3</sub>Si<sup>+</sup> ([M+H]<sup>+</sup>) requires 610.2208; found 610.2198.

**(1*S*,2*R*,3*R*,4*R*,5*S*)-*N*(1)-Benzyl-2-[(triisopropylsilyloxy)methyl]-3-benzyloxy-4-hydroxy-1-azabicyclo[3.1.0]hexanium tetrafluoroborate 15**

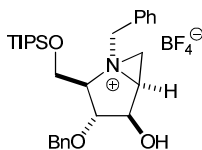

AgBF<sub>4</sub> (23 mg, 0.118 mmol) was added to a stirred solution of **14** (60 mg, 0.10 mmol, >99:1 dr) in CH<sub>2</sub>Cl<sub>2</sub> at rt and the resultant mixture was allowed to stir at rt for 1 h. The reaction mixture was then filtrated through

Celite<sup>®</sup> (eluent CH<sub>2</sub>Cl<sub>2</sub>) and concentrated *in vacuo* to give **15** as an orange oil (65 mg, quant, >99:1 dr); [ $\alpha$ ]<sub>D</sub><sup>20</sup> +0.6 (*c* 0.4 in CHCl<sub>3</sub>);  $\nu_{\max}$  (ATR) 3510 (O–H), 2945, 2867 (C–H);  $\delta_{\text{H}}$  (400 MHz, CD<sub>2</sub>Cl<sub>2</sub>) 0.94–1.24 (21H, m, Si(CHMe<sub>2</sub>)<sub>3</sub>), 3.09 (1H, dd, *J* 8.0, 4.5, C(6)*H*<sub>A</sub>), 3.56 (1H, dd, *J* 6.3, 4.5, C(6)*H*<sub>B</sub>), 3.76–3.86 (2H, m, C(2)*H*, C(3)*H*), 3.98–4.04 (2H, m, C(2)CH<sub>A</sub>H<sub>B</sub>, OH), 4.07–4.20 (2H, m, C(2)CH<sub>A</sub>H<sub>B</sub>, C(5)*H*), 4.42 (1H, d, *J* 13.1, NCH<sub>A</sub>H<sub>B</sub>Ph), 4.54 (1H, d, *J* 11.6, OCH<sub>A</sub>H<sub>B</sub>Ph), 4.77 (1H, d, *J* 13.1, NCH<sub>A</sub>H<sub>B</sub>Ph), 4.82 (1H, d, *J* 11.6, OCH<sub>A</sub>H<sub>B</sub>Ph), 4.83–4.88 (1H, m, C(4)*H*), 7.28–7.58 (10H, m, *Ph*);  $\delta_{\text{C}}$  (100 MHz, CD<sub>2</sub>Cl<sub>2</sub>) 11.7 (Si(CHMe<sub>2</sub>)<sub>3</sub>), 17.8 (Si(CHMe<sub>2</sub>)<sub>3</sub>), 37.4 (C(6)), 49.2 (C(5)), 59.5 (C(2)CH<sub>2</sub>), 61.3 (NCH<sub>2</sub>Ph), 68.3 (C(2)), 72.6 (C(4)), 72.7 (OCH<sub>2</sub>Ph), 79.0 (C(3)), 128.1, 128.3, 128.5, 129.9, 131.0, 131.2 (*o,m,p-Ph*), 136.9 (2 × *i-Ph*); *m/z* (ESI<sup>+</sup>) 514 ([M+MeOH]<sup>+</sup>, 40%), 482 ([M]<sup>+</sup>, 100%); HRMS (ESI<sup>+</sup>) C<sub>30</sub>H<sub>48</sub>NO<sub>4</sub>Si<sup>+</sup> ([M+MeOH]<sup>+</sup>) requires 514.3347; found 514.3345.

**(*R,R,R,R*)-*N*(1)-Benzyl-2-[(triisopropylsilyloxy)methyl]-3-benzyloxy-4,5-dihydroxy-4,5-*O*-carbonylpiperidine **16****

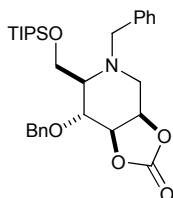

*Method A (from 11) – Step 1:* I<sub>2</sub> (129 mg, 0.51 mmol) and NaHCO<sub>3</sub> (43 mg, 0.51 mmol) were added to a stirred solution of **11** (100 mg, 0.17 mmol, >99:1 dr) in dioxane/H<sub>2</sub>O (3:1, 4 mL) at rt and the resultant mixture was stirred at rt for 16 h. The reaction mixture was then diluted with Et<sub>2</sub>O (15 mL) and washed with satd aq Na<sub>2</sub>S<sub>2</sub>O<sub>3</sub> (15 mL), then dried and concentrated *in vacuo* to give a 50:50 mixture of **16** and 1-phenylethanol (100 mg).

*Step 2:* Ac<sub>2</sub>O (0.18 mL, 1.9 mmol) and DMAP (4 mg, 0.04 mmol) were added to a stirred solution of the residue of **16** and 1-phenylethanol (100 mg) in pyridine (8 mL) at 0 °C. The resultant mixture was allowed to warm to rt and was stirred at rt for 16 h. The reaction mixture was then diluted with H<sub>2</sub>O (20 mL) and EtOAc (20 mL), and the aqueous layer was extracted with EtOAc (2 × 10 mL). The combined organic extracts were washed with brine, then dried and concentrated *in vacuo* to give a 50:50 mixture of **16** and  $\alpha$ -methylbenzylacetate. Purification via flash column chromatography (eluent 30–40 °C petrol/ EtOAc, 12:1) gave **16** as a colourless oil (23 mg, 26%, >99:1 dr); [ $\alpha$ ]<sub>D</sub><sup>20</sup> –32.6 (*c* 1.0 in CHCl<sub>3</sub>);  $\nu_{\max}$  (ATR) 2943, 2866 (C–H), 1810 (C=O);  $\delta_{\text{H}}$  (400 MHz, CDCl<sub>3</sub>) 1.02–1.15 (21H, m, Si(CHMe<sub>2</sub>)<sub>3</sub>), 2.83 (1H, dd, *J* 13.7, 1.0, C(6)*H*<sub>A</sub>), 2.90 (1H, dd, *J* 13.7, 2.0, C(6)*H*<sub>B</sub>), 2.98 (1H, app dd, *J* 9.2, 4.5, C(2)*H*), 3.43 (1H, d, *J* 14.2, NCH<sub>A</sub>H<sub>B</sub>Ph), 3.71 (1H, app t, *J* 9.2, C(2)CH<sub>A</sub>H<sub>B</sub>), 3.91 (1H, dd, *J* 10.1, 4.5, C(2)CH<sub>A</sub>H<sub>B</sub>), 4.06 (1H, d, *J* 14.2,

NCH<sub>A</sub>H<sub>B</sub>Ph), 4.30 (1H, app d, *J* 3.6, C(3)*H*), 4.52 (1H, d, *J* 11.6, OCH<sub>A</sub>H<sub>B</sub>Ph), 4.70–4.78 (2H, m, C(5)*H*, OCH<sub>A</sub>H<sub>B</sub>Ph), 4.79–4.84 (1H, dd, *J* 8.3, 3.6, C(4)*H*), 7.23–7.40 (10H, m, *Ph*); δ<sub>C</sub> (100 MHz, CDCl<sub>3</sub>) 11.9 (Si(CHMe<sub>2</sub>)<sub>3</sub>), 18.0 (Si(CHMe<sub>2</sub>)<sub>3</sub>), 49.1 (C(6)), 59.6 (NCH<sub>2</sub>Ph), 62.8 (C(2)CH<sub>2</sub>), 65.0 (C(2)), 71.8 (OCH<sub>2</sub>Ph), 72.4 (C(3)), 73.4 (C(4)), 74.4 (C(5)), 127.3, 127.6, 128.0, 128.3, 128.5, 128.5 (*o,m,p-Ph*), 137.5, 137.9 (*i-Ph*), 154.6 (CO); *m/z* (ESI<sup>+</sup>) 526 ([M+H]<sup>+</sup>, 100%); HRMS (ESI<sup>+</sup>) C<sub>30</sub>H<sub>44</sub>NO<sub>5</sub>Si<sup>+</sup> ([M+H]<sup>+</sup>) requires 526.2983; found 526.2968.

**Method B (from **14**):** AgBF<sub>4</sub> (23 mg, 0.118 mmol) was added to a stirred solution of **14** (60 mg, 0.10 mmol, >99:1 dr) in CH<sub>2</sub>Cl<sub>2</sub> at rt and the resultant mixture was allowed to stir at rt for 1 h. The reaction mixture was then filtered through Celite<sup>®</sup> (eluent CH<sub>2</sub>Cl<sub>2</sub>) and concentrated *in vacuo* to give **15** as an orange oil (65 mg, quant, >99:1 dr). NaHCO<sub>3</sub> (25 mg, 0.29 mmol) was added to a stirred solution of the residue of **15** (65 mg, >99:1 dr) in dioxane/H<sub>2</sub>O (3:1, 4 mL) at rt and the resultant mixture was stirred at rt for 16 h. The reaction mixture was then diluted with Et<sub>2</sub>O (15 mL) and washed with satd aq Na<sub>2</sub>S<sub>2</sub>O<sub>3</sub> (15 mL), then dried and concentrated *in vacuo* to give **16** as a yellow oil (52 mg, quant, >99:1 dr).

**(*R,R,R,R*)-*N*(1)-Benzyl-2-[(triisopropylsilyloxy)methyl]-3-benzyloxy-4,5-dihydropiperidine **17****

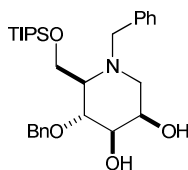

K<sub>2</sub>CO<sub>3</sub> (32 mg, 0.23 mmol) was added to a stirred solution of **16** (40 mg, 0.08 mmol, >99:1 dr) in MeOH (2 mL) at rt and the resulting mixture was allowed to stir at rt for 16 h. The reaction mixture was then concentrated *in vacuo* and the residue was partitioned between H<sub>2</sub>O (15 mL) and EtOAc (15 mL). The aqueous layer was extracted with EtOAc (2 × 5 mL) and the combined organic extracts were then dried and concentrated *in vacuo* to give **17** as a yellow oil (40 mg, quant, >99:1 dr); [α]<sub>D</sub><sup>20</sup> −19.8 (*c* 1.0 in CHCl<sub>3</sub>); ν<sub>max</sub> (ATR) 3395 (O–H), 2942, 2866 (C–H); δ<sub>H</sub> (400 MHz, CDCl<sub>3</sub>) 1.02–1.14 (21H, m, Si(CHMe<sub>2</sub>)<sub>3</sub>), 2.24 (1H, d, *J* 12.4, C(6)*H*<sub>A</sub>), 2.38–2.47 (1H, m, C(2)*H*), 2.92 (1H, dd, *J* 12.4, 4.6, C(6)*H*<sub>B</sub>), 3.36 (1H, d, *J* 13.3, NCH<sub>A</sub>H<sub>B</sub>Ph), 3.57 (1H, app t, *J* 8.1, C(3)*H*), 3.65 (1H, dd, *J* 8.1, 3.3, C(4)*H*), 3.72–3.80 (1H, m, C(5)*H*), 4.03 (1H, dd, *J* 11.1, 4.0, C(2)CH<sub>A</sub>H<sub>B</sub>), 4.22 (1H, dd, *J* 11.1, 1.8, C(2)CH<sub>A</sub>H<sub>B</sub>), 4.43 (1H, d, *J* 13.3, NCH<sub>A</sub>H<sub>B</sub>Ph), 4.65 (1H, d, *J* 11.4, OCH<sub>A</sub>H<sub>B</sub>Ph), 5.03 (1H, d, *J* 11.4, OCH<sub>A</sub>H<sub>B</sub>Ph), 7.26–7.40 (10H, m, *Ph*); δ<sub>C</sub> (100 MHz, CDCl<sub>3</sub>) 12.0 (Si(CHMe<sub>2</sub>)<sub>3</sub>), 18.1 (Si(CHMe<sub>2</sub>)<sub>3</sub>), 54.1 (C(6)), 57.2 (NCH<sub>2</sub>Ph), 61.9 (C(2)CH<sub>2</sub>), 66.6 (C(2)), 67.9 (C(5)), 74.3 (OCH<sub>2</sub>Ph), 75.8 (C(4)), 78.6 (C(3)), 127.2, 127.6, 127.9, 128.4, 128.5, 129.0 (*o,m,p-Ph*), 138.5 (*i-Ph*); *m/z* (ESI<sup>+</sup>) 500 ([M+H]<sup>+</sup>, 100%); HRMS (ESI<sup>+</sup>) C<sub>29</sub>H<sub>46</sub>NO<sub>4</sub>Si<sup>+</sup> ([M+H]<sup>+</sup>) requires 500.3191; found 500.3190.

**(*R,R,R,R*)-*N*(1)-Benzyl-2-[(triisopropylsilyloxy)methyl]-3-benzyloxy-4,5-diacetoxypiperidine 18**

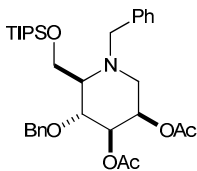

Ac<sub>2</sub>O (0.08 mL, 0.80 mmol) and DMAP (2 mg, 0.02 mmol) were added to a stirred solution of **17** (40 mg, 80 μmol, >99:1 dr) in pyridine (4 mL) at 0 °C. The resultant mixture was allowed to warm to rt and was stirred at rt for 16 h. The reaction mixture was then diluted with H<sub>2</sub>O (15 mL) and EtOAc (15 mL), and the aqueous layer was extracted with EtOAc (2 × 5 mL). The combined organic extracts were washed with brine, then dried and concentrated *in vacuo*. Purification via flash column chromatography (eluent 30–40 °C petrol/EtOAc, 9:1) gave **18** as a yellow oil (47 mg, quant, >99:1 dr); [α]<sub>D</sub><sup>20</sup> –14.0 (*c* 1.0 in CHCl<sub>3</sub>); ν<sub>max</sub> (ATR) 2942, 2866 (C–H), 1748 (C=O); δ<sub>H</sub> (400 MHz, CDCl<sub>3</sub>) 0.90–1.07 (21H, m, Si(CHMe<sub>2</sub>)<sub>3</sub>), 2.00 (3H, s, COMe), 2.07 (3H, s, COMe), 2.41 (1H, dd, *J* 13.2, 2.6, C(6)*H*<sub>A</sub>), 2.66–2.72 (1H, m, C(2)*H*), 2.94 (1H, dd, *J* 13.2, 6.2, C(6)*H*<sub>B</sub>), 3.53 (1H, d, *J* 14.0, NCH<sub>A</sub>H<sub>B</sub>Ph), 3.88 (1H, app t, *J* 7.3, C(3)*H*), 3.98 (1H, dd, *J* 10.6, 5.3, C(2)CH<sub>A</sub>H<sub>B</sub>), 4.12 (1H, dd, *J* 10.6, 3.5, C(2)CH<sub>A</sub>H<sub>B</sub>), 4.33 (1H, d, *J* 14.0, NCH<sub>A</sub>H<sub>B</sub>Ph), 4.62 (1H, d, *J* 11.4, OCH<sub>A</sub>H<sub>B</sub>Ph), 4.74 (1H, d, *J* 11.4, OCH<sub>A</sub>H<sub>B</sub>Ph), 5.15 (1H, dd, *J* 7.3, 3.2, C(4)*H*), 5.26 (1H, app dt, *J* 6.2, 3.2, C(5)*H*), 7.20–7.37 (10H, m, *Ph*); δ<sub>C</sub> (100 MHz, CDCl<sub>3</sub>) 11.9 (Si(CHMe<sub>2</sub>)<sub>3</sub>), 18.0 (Si(CHMe<sub>2</sub>)<sub>3</sub>), 21.0 (2 × COMe), 49.9 (C(6)), 57.7 (NCH<sub>2</sub>Ph), 60.4 (C(2)CH<sub>2</sub>), 61.3 (C(2)), 65.2 (C(5)), 67.1 (C(4)), 73.8 (OCH<sub>2</sub>Ph), 75.0 (C(3)), 126.9, 127.4, 127.6, 128.1, 128.3, 128.5 (*o,m,p-Ph*), 138.3, 139.3 (*i-Ph*), 170.1, 170.3 (COMe); *m/z* (ESI<sup>+</sup>) 584 ([M+H]<sup>+</sup>, 100%); HRMS (ESI<sup>+</sup>) C<sub>33</sub>H<sub>50</sub>NO<sub>6</sub>Si<sup>+</sup> ([M+H]<sup>+</sup>) requires 584.3402; found 584.3401.

**(*R,R,R,R*)-*N*(1)-Benzyl-2-(hydroxymethyl)-3-benzyloxy-4,5-dihydroxypiperidine 19**

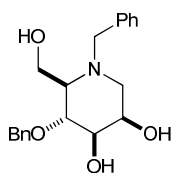

**Method A (from 18) – Step 1:** HF·pyridine (70%, 0.15 mL, 5.70 mmol) was added dropwise to a stirred solution of **18** (111 mg, 0.19 mmol, >99:1 dr) in THF (5 mL) at 0 °C. The resultant mixture was allowed to warm to rt and was stirred at rt for 16 h. The reaction mixture was cooled to 0 °C and satd aq NaHCO<sub>3</sub> (0.5 mL) was then carefully added. The resultant mixture was concentrated *in vacuo* and the residue was partitioned between H<sub>2</sub>O (10 mL) and EtOAc (10 mL). The aqueous layer was extracted with EtOAc (2 × 5 mL) and the combined organic extracts were then dried and concentrated *in vacuo* (89 mg).

**Step 2:** K<sub>2</sub>CO<sub>3</sub> (73 mg, 0.57 mmol) was added to a stirred solution of the residue (89 mg) in MeOH (5 mL) at rt and the resultant mixture was allowed to stir at rt for 6 h before being concentrated *in vacuo*. The residue was

dissolved in H<sub>2</sub>O (10 mL) and extracted with CHCl<sub>3</sub>/<sup>i</sup>PrOH (3:1, 3 × 5 mL). The combined organic extracts were then dried and concentrated *in vacuo*. Purification via flash column chromatography (eluent CHCl<sub>3</sub>/MeOH, 50:1) gave **19** as a white solid (46 mg, 70% from **18**, >99:1 dr); mp 70–72 °C; [α]<sub>D</sub><sup>20</sup> –36.0 (*c* 1.0 in CHCl<sub>3</sub>); ν<sub>max</sub> (ATR) 3384 (O–H), 2921 (C–H); δ<sub>H</sub> (400 MHz, CDCl<sub>3</sub>) 2.29–2.34 (2H, m, C(2)*H*, C(6)*H*<sub>A</sub>), 3.04 (1H, dd, *J* 12.6, 3.8, C(6)*H*<sub>B</sub>), 3.39 (1H, d, *J* 13.2, NCH<sub>A</sub>H<sub>B</sub>Ph), 3.60 (1H, dd, *J* 8.7, 3.3, C(4)*H*), 3.77 (1H, app t, *J* 8.7, C(3)*H*), 3.85 (1H, br s, C(5)*H*), 3.93 (1H, dd, *J* 12.0, 1.6, C(2)CH<sub>A</sub>H<sub>B</sub>), 4.03 (1H, dd, *J* 12.0, 2.7, C(2)CH<sub>A</sub>H<sub>B</sub>), 4.14 (1H, d, *J* 13.2, NCH<sub>A</sub>H<sub>B</sub>Ph), 4.78 (1H, d, *J* 11.3, OCH<sub>A</sub>H<sub>B</sub>Ph), 4.93 (1H, d, *J* 11.3, OCH<sub>A</sub>H<sub>B</sub>Ph), 7.26–7.42 (10H, m, *Ph*); δ<sub>C</sub> (100 MHz, CDCl<sub>3</sub>) 54.8 (C(6)), 57.0 (NCH<sub>2</sub>Ph), 58.3 (C(2)CH<sub>2</sub>), 65.7 (C(2)), 67.8 (C(5)), 75.0 (OCH<sub>2</sub>Ph), 75.2 (C(4)), 77.2 (C(3)), 127.5, 128.0, 128.1, 128.6, 128.7, 128.8 (*o,m,p-Ph*), 137.7, 138.3 (*i-Ph*); *m/z* (ESI<sup>+</sup>) 344 ([M+H]<sup>+</sup>, 100%); HRMS (ESI<sup>+</sup>) C<sub>20</sub>H<sub>26</sub>NO<sub>4</sub><sup>+</sup> ([M+H]<sup>+</sup>) requires 344.1856; found 344.1855.

*Method B (from 11) – Step 1:* I<sub>2</sub> (411 mg, 1.62 mmol) and NaHCO<sub>3</sub> (136 mg, 1.62 mmol) were added to a stirred solution of **11** (319 mg, 0.54 mmol, >99:1 dr) in dioxane/H<sub>2</sub>O (3:1, 20 mL) at rt and the resultant mixture was stirred at rt for 16 h. The reaction mixture was then diluted with Et<sub>2</sub>O (20 mL) and washed with satd aq Na<sub>2</sub>S<sub>2</sub>O<sub>3</sub> (20 mL), then dried and concentrated *in vacuo* to give a 50:50 mixture of **16** and 1-phenylethanol (319 mg).

*Step 2:* HF·pyridine (70%, 0.46 mL, 17.7 mmol) was added dropwise to a solution of the residue of **16** and 1-phenylethanol (319 mg) in THF (5 mL) at 0 °C. The resultant mixture was allowed to warm to rt and was stirred at rt for 16 h. The reaction mixture was then cooled to 0 °C and satd aq NaHCO<sub>3</sub> (1 mL) was carefully added. The resultant mixture was concentrated *in vacuo* and the residue was partitioned between H<sub>2</sub>O (10 mL) and EtOAc (10 mL). The aqueous layer was extracted with EtOAc (2 × 5 mL) and the combined organic extracts were then dried and concentrated *in vacuo* to give **20** (230 mg).

*Step 3:* K<sub>2</sub>CO<sub>3</sub> (245 mg, 1.77 mmol) was added to a stirred solution of the residue of **20** (230 mg) in MeOH (5 mL) at rt and the resultant mixture was allowed to stir at rt for 6 h before being concentrated *in vacuo*. The residue was then dissolved in H<sub>2</sub>O (10 mL) and extracted with CHCl<sub>3</sub>/<sup>i</sup>PrOH (3:1, 3 × 5 mL). The combined organic extracts were then dried and concentrated *in vacuo*. Purification via flash column chromatography (eluent CHCl<sub>3</sub>/MeOH, 50:1) gave **19** as a white solid (75 mg, 40% from **11**, >99:1 dr).

**(*R,R,R,R*)-1,5-Dideoxy-1,5-imino-D-mannose [(-)-1-deoxymannojirimycin] 21**

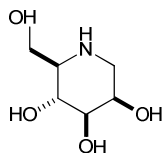

Pd(OH)<sub>2</sub>/C (35 mg) was added to a stirred solution of **19** (70 mg, 0.20 mmol, >99:1 dr) in degassed MeOH (4 mL) and the resultant suspension was stirred at rt for 48 h under an atmosphere of H<sub>2</sub> (5 atm). HCl (1.0 M in Et<sub>2</sub>O, 1 mL) was then added and the resultant suspension was stirred for a further 5 min before being filtered through Celite<sup>®</sup> (eluent MeOH). The filtrate was concentrated *in vacuo*. Purification via ion exchange chromatography on Dowex-50WX8 resin (hydrogen form, 100–200 mesh, eluent H<sub>2</sub>O) gave **21** as a white solid (29 mg, 87%, >99:1 dr); mp 180–182 °C; {lit.<sup>4</sup> mp 185 °C}; [α]<sub>D</sub><sup>20</sup> –38.6 (*c* 1.0 in H<sub>2</sub>O); {lit.<sup>5</sup> for sample isolated from a natural source [α]<sub>D</sub> –41.4 (*c* 0.74 in H<sub>2</sub>O); lit.<sup>6</sup> [α]<sub>D</sub><sup>20</sup> –40 (*c* 1.35 in H<sub>2</sub>O); lit.<sup>7</sup> [α]<sub>D</sub><sup>22</sup> –36.1 (*c* 0.33 in H<sub>2</sub>O); lit.<sup>8</sup> [α]<sub>D</sub> –39.0 (*c* 0.1 in H<sub>2</sub>O); lit.<sup>9</sup> for enantiomer [α]<sub>D</sub> +40.2 (*c* 0.65 in H<sub>2</sub>O); lit.<sup>10</sup> for enantiomer [α]<sub>D</sub> +40.42 (*c* 0.728 in H<sub>2</sub>O)}; ν<sub>max</sub> (ATR) 3300 (O–H), 2921 (C–H); δ<sub>H</sub> (400 MHz, D<sub>2</sub>O) 2.44 (1H, dt, *J* 9.8, 4.1, C(5)*H*), 2.72 (1H, dd, *J* 14.3, 1.4, C(1)*H*<sub>A</sub>), 2.96 (1H, dd, *J* 14.3, 2.7, C(1)*H*<sub>B</sub>), 3.52 (1H, dd, *J* 9.8, 2.9, C(3)*H*), 3.56 (1H, app t, *J* 9.8, C(4)*H*), 3.73 (2H, d, *J* 4.1, C(6)*H*<sub>2</sub>), 3.94–3.97 (1H, m, C(2)*H*); δ<sub>C</sub> (100 MHz, D<sub>2</sub>O) 48.1 (C(1)), 60.4 (C(5)), 60.5 (C(6)), 68.2 (C(4)), 69.0 (C(2)), 74.4 (C(3)); *m/z* (FI<sup>+</sup>) 163 ([M]<sup>+</sup>, 100%); HRMS (FI<sup>+</sup>) C<sub>6</sub>H<sub>13</sub>NO<sub>4</sub><sup>+</sup> ([M]<sup>+</sup>) requires 163.0839; found 163.0851.

**(2*R*,3*R*,4*S*,5*S*)-*N*(1)-Benzyl-2-[(triisopropylsilyloxy)methyl]-3-benzyloxy-4,5-dihydropiperidine 22**

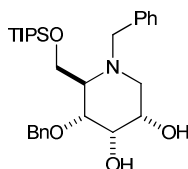

K<sub>2</sub>CO<sub>3</sub> (32 mg, 0.23 mmol) was added to a stirred solution of **24** (45 mg, 0.08 mmol, >99:1 dr) in MeOH (4 mL) at rt and the resultant mixture was allowed to stir at rt for 16 h. The resultant mixture was concentrated *in vacuo* and the residue was partitioned between H<sub>2</sub>O (10 mL) and EtOAc (10 mL). The aqueous layer was extracted with EtOAc (2 × 5 mL) and the combined organic extracts were then dried

<sup>4</sup> Xu, X.-M.; Zhou, W.-S. *Tetrahedron Lett.* **1996**, 37, 1461.

<sup>5</sup> Asano, N.; Oseki, K.; Kizu, H.; Matsui, K. *J. Med. Chem.* **1994**, 37, 3701.

<sup>6</sup> Broxterman, H. J. G.; Neefjes, J. J.; Van der Marel, G. A.; Ploegh, H. L.; Van Boom, J. H. *J. Carbohydr. Chem.* **1988**, 7, 593.

<sup>7</sup> Concia, A. L.; Lozano, C.; Castillo, J. A.; Parella, T.; Joglar, J.; Clapés, P. *Chem. Eur. J.* **2009**, 15, 3808.

<sup>8</sup> Kim, I. S.; Lee, H. Y.; Jung, Y. H. *Heterocycles* **2007**, 71, 1787.

<sup>9</sup> Kato, A.; Kato, N.; Kano, E.; Adachi, I.; Ikeda, K.; Yu, L.; Okamoto, T.; Banba, Y.; Ouchi, H.; Takahata, H.; Asano, N. *J. Med. Chem.* **2005**, 48, 2036.

<sup>10</sup> Singh, A.; Kim, B.; Lee, W.; Ha, H.-J. *Org. Biomol. Chem.* **2011**, 9, 1372.

and concentrated *in vacuo* to give **22** as a yellow oil (40 mg, quant, >99:1 dr);  $[\alpha]_{\text{D}}^{20} -1.0$  (*c* 1.0 in  $\text{CHCl}_3$ );  $\nu_{\text{max}}$  (ATR) 3425 (O–H), 2942, 2866 (C–H);  $\delta_{\text{H}}$  (400 MHz,  $\text{CDCl}_3$ ) 1.01–1.12 (21H, m,  $\text{Si}(\text{CHMe}_2)_3$ ), 2.80 (1H, dd, *J* 12.4, 4.0, C(6)*H*<sub>A</sub>), 2.94 (1H, dd, *J* 12.4, 2.0, C(6)*H*<sub>B</sub>), 3.10–3.18 (1H, m, C(2)*H*), 3.70–3.75 (1H, m, C(5)*H*), 3.80–3.98 (6H, m, C(3)*H*, C(4)*H*, C(2)*CH*<sub>2</sub>, *NCH*<sub>2</sub>Ph), 4.44 (1H, d, *J* 11.5, *OCH*<sub>A</sub>*H*<sub>B</sub>Ph), 4.52 (1H, d, *J* 11.5, *OCH*<sub>A</sub>*H*<sub>B</sub>Ph), 7.25–7.38 (10H, m, *Ph*);  $\delta_{\text{C}}$  (100 MHz,  $\text{CDCl}_3$ ) 11.8 ( $\text{Si}(\text{CHMe}_2)_3$ ), 18.0 ( $\text{Si}(\text{CHMe}_2)_3$ ), 52.6 (C(6)), 58.1, 58.3 (C(2)*CH*<sub>2</sub>, *NCH*<sub>2</sub>Ph), 59.9 (C(2)), 67.4 (C(4)), 69.7 (C(5)), 72.1 (*OCH*<sub>2</sub>Ph), 78.6 (C(3)), 127.2, 127.8, 127.9, 128.3, 128.5, 128.6 (*o,m,p-Ph*), 137.8 (*i-Ph*); *m/z* ( $\text{ESI}^+$ ) 500 ( $[\text{M}+\text{H}]^+$ , 100%); HRMS ( $\text{ESI}^+$ )  $\text{C}_{29}\text{H}_{46}\text{NO}_4\text{Si}^+$  ( $[\text{M}+\text{H}]^+$ ) requires 500.3191; found 500.3185.

**(2*R*,3*R*,4*S*,5*S*)-*N*(1)-Benzyl-2-[(triisopropylsilyloxy)methyl]-3-benzyloxy-4,5-diacetoxypiperidine **24****

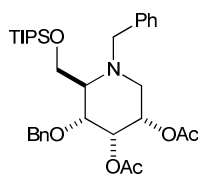

*Step 1*:  $\text{I}_2$  (1.35 g, 5.31 mmol) and  $\text{NaHCO}_3$  (446 mg, 5.31 mmol) were added to a stirred solution of **12** (1.04 g, 1.77 mmol, >99:1 dr) in dioxane/ $\text{H}_2\text{O}$  (3:1, 40 mL) at rt and the resultant mixture was stirred at rt for 16 h. The reaction mixture was then diluted with  $\text{Et}_2\text{O}$  (50 mL) and washed with satd aq  $\text{Na}_2\text{S}_2\text{O}_3$  (50 mL), then dried and concentrated *in vacuo* to give a 73:27 mixture of **22** and **23** (1.10 g). Data for mixture:  $\nu_{\text{max}}$  (ATR) 2943, 2866 (C–H), 1804 (C=O); *m/z* ( $\text{ESI}^+$ ) 526 ( $[\text{M}+\text{H}]^+$ , 100%); HRMS ( $\text{ESI}^+$ )  $\text{C}_{30}\text{H}_{44}\text{NO}_5\text{Si}^+$  ( $[\text{M}+\text{H}]^+$ ) requires 526.2983; found 526.2970. Data for **23**:  $\delta_{\text{H}}$  (400 MHz,  $\text{CDCl}_3$ ) 1.00–1.16 (21H, m,  $\text{Si}(\text{CHMe}_2)_3$ ), 2.95 (1H, dd, *J* 12.3, 6.1, C(6)*H*<sub>A</sub>), 3.01–3.06 (1H, m, C(2)*H*), 3.21 (1H, dd, *J* 12.3, 5.6, C(6)*H*<sub>B</sub>), 3.67 (1H, d, *J* 13.7, *NCH*<sub>A</sub>*H*<sub>B</sub>Ph), 3.72–3.80 (2H, m, C(2)*CH*<sub>2</sub>), 3.89 (1H, d, *J* 13.7, *NCH*<sub>A</sub>*H*<sub>B</sub>Ph), 4.13 (1H, dd, *J* 5.8, 3.2, C(3)*H*), 4.60 (1H, d, *J* 11.4, *OCH*<sub>A</sub>*H*<sub>B</sub>Ph), 4.68–4.76 (2H, m, C(5)*H*, *OCH*<sub>A</sub>*H*<sub>B</sub>Ph), 4.96 (1H, dd, *J* 8.4, 3.2, C(4)*H*), 7.24–7.40 (10H, m, *Ph*);  $\delta_{\text{C}}$  (100 MHz,  $\text{CDCl}_3$ ) 12.0 ( $\text{Si}(\text{CHMe}_2)_3$ ), 18.1 ( $\text{Si}(\text{CHMe}_2)_3$ ), 48.7 (C(6)), 58.6 (*NCH*<sub>2</sub>Ph), 61.7 (C(2)), 62.0 (C(2)*CH*<sub>2</sub>), 72.6 (*OCH*<sub>2</sub>Ph), 73.6 (C(4)), 73.8, 73.9 (C(3), C(5)), 126.9, 127.7, 127.8, 128.2, 128.4, 128.6 (*o,m,p-Ph*), 137.5, 138.0 (*i-Ph*), 155.2 (CO).

*Step 2*:  $\text{K}_2\text{CO}_3$  (734 mg, 5.31 mmol) was added to a stirred solution of the residue of the 73:27 mixture of **22** and **23** (1.10 g) in MeOH (50 mL) at rt and the resultant mixture was allowed to stir at rt for 16 h. The reaction mixture was then concentrated *in vacuo* and the residue was partitioned between  $\text{H}_2\text{O}$  (50 mL) and EtOAc (50 mL). The aqueous layer was extracted with EtOAc (2 × 25 mL) and the combined organic extracts were then dried and concentrated *in vacuo* to give **22** (760 mg, >99:1 dr).

*Step 3*:  $\text{Ac}_2\text{O}$  (1.67 mL, 17.7 mmol) and DMAP (43 mg, 0.35 mmol) were added to a stirred solution of the residue of **22** (760 mg) in pyridine (40 mL) at 0 °C. The resultant mixture was allowed to warm to rt and was

stirred at rt for 16 h. The reaction mixture was then diluted with H<sub>2</sub>O (50 mL) and EtOAc (50 mL), and the aqueous layer was extracted with EtOAc (2 × 25 mL). The combined organic extracts were washed with brine (25 mL), then dried and concentrated *in vacuo*. Purification via flash column chromatography (eluent 30–40 °C petrol/ EtOAc, 12:1) gave **24** as a colourless oil (440 mg, 43% from **12**, >99:1 dr);  $[\alpha]_{\text{D}}^{20}$  –1.7 (*c* 1.0 in CHCl<sub>3</sub>);  $\nu_{\text{max}}$  (ATR) 2944, 2866 (C–H), 1747 (C=O);  $\delta_{\text{H}}$  (400 MHz, CDCl<sub>3</sub>) 0.95–1.12 (21H, m, Si(CHMe<sub>2</sub>)<sub>3</sub>), 1.95 (3H, s, COMe), 2.12 (3H, s, COMe), 2.41 (1H, t, *J* 10.9, C(6)*H*<sub>A</sub>), 2.64 (1H, dd, *J* 10.9, 4.7, C(6)*H*<sub>B</sub>), 2.69 (1H, app dd, *J* 9.6, 3.2, C(2)*H*), 3.31 (1H, d, *J* 13.7, NCH<sub>A</sub>H<sub>B</sub>Ph), 3.58 (1H, dd, *J* 9.6, 2.2, C(3)*H*), 3.96 (1H, dd, *J* 11.1, 3.2, C(2)CH<sub>A</sub>H<sub>B</sub>), 4.22 (1H, app d, *J* 11.1, C(2)CH<sub>A</sub>H<sub>B</sub>), 4.36 (1H, d, *J* 10.8, OCH<sub>A</sub>H<sub>B</sub>Ph), 4.50 (1H, d, *J* 13.7, NCH<sub>A</sub>H<sub>B</sub>Ph), 4.69 (1H, d, *J* 10.8, OCH<sub>A</sub>H<sub>B</sub>Ph), 4.83–4.89 (1H, m, C(5)*H*), 5.83 (1H, br s, C(4)*H*), 7.22–7.36 (10H, m, *Ph*);  $\delta_{\text{C}}$  (100 MHz, CDCl<sub>3</sub>) 12.0 (Si(CHMe<sub>2</sub>)<sub>3</sub>), 18.1 (Si(CHMe<sub>2</sub>)<sub>3</sub>), 20.8, 20.9 (COMe), 48.8 (C(6)), 57.1 (NCH<sub>2</sub>Ph), 61.9 (C(2)CH<sub>2</sub>), 62.8 (C(2)), 66.6 (C(4)), 68.0 (C(5)), 71.1 (OCH<sub>2</sub>Ph), 74.2 (C(3)), 126.9, 127.7, 128.2, 128.2, 128.3, 128.7 (*o,m,p-Ph*), 137.6, 139.4 (*i-Ph*), 170.0, 170.5 (COMe); *m/z* (ESI<sup>+</sup>) 584 ([M+H]<sup>+</sup>, 100%); HRMS (ESI<sup>+</sup>) C<sub>33</sub>H<sub>50</sub>NO<sub>6</sub>Si<sup>+</sup> ([M+H]<sup>+</sup>) requires 584.3402; found 584.3402.

**(2*R*,3*R*,4*S*,5*S*)-N(1)-Benzyl-2-(hydroxymethyl)-3-benzyloxy-4,5-dihydroxypiperidine **25****

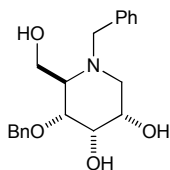

**Method A (from **24**):** 6.0 M aq HCl (2 mL) was added to a stirred solution of **24** (110 mg, 0.19 mmol, >99:1 dr) in MeOH (5 mL) and the resultant mixture was heated at 50 °C for 16 h before being allowed to cool to rt and concentrated *in vacuo*. The residue was dissolved in MeOH (5 mL) and K<sub>2</sub>CO<sub>3</sub> (520 mg, 3.76 mmol) was added to the resultant solution. The reaction mixture was then stirred at rt for 6 h, then concentrated *in vacuo*. The residue was then dissolved in H<sub>2</sub>O (10 mL) and the resultant solution was extracted with CHCl<sub>3</sub>/iPrOH (3:1, 3 × 5 mL). The combined organic extracts were then dried and concentrated *in vacuo*. Purification via flash column chromatography (eluent CHCl<sub>3</sub>/MeOH, 50:1) gave **25** as a white solid (56 mg, 86%, >99:1 dr); mp 70–72 °C;  $[\alpha]_{\text{D}}^{20}$  –5.4 (*c* 1.0 in CHCl<sub>3</sub>);  $\nu_{\text{max}}$  (ATR) 3500 (O–H);  $\delta_{\text{H}}$  (400 MHz, CDCl<sub>3</sub>) 2.53 (1H, dd, *J* 11.1, 9.3, C(6)*H*<sub>A</sub>), 2.57 (1H, br s, OH), 2.68–2.74 (1H, m, C(2)*H*), 2.80 (1H, dd, *J* 11.1, 4.2, C(6)*H*<sub>B</sub>), 3.45 (1H, d, *J* 13.6, NCH<sub>A</sub>H<sub>B</sub>Ph), 3.61–3.69 (1H, m, C(5)*H*), 3.71 (1H, dd, *J* 7.8, 3.0, C(3)*H*), 3.88 (1H, dd, *J* 11.6, 2.0, C(2)CH<sub>A</sub>H<sub>B</sub>), 3.95 (1H, dd, *J* 11.6, 3.8, C(2)CH<sub>A</sub>H<sub>B</sub>), 4.06 (1H, d, *J* 13.6, NCH<sub>A</sub>H<sub>B</sub>Ph), 4.10–4.14 (1H, m, C(4)*H*), 4.62 (2H, app s, OCH<sub>2</sub>Ph), 7.25–7.43 (10H, m, *Ph*);  $\delta_{\text{C}}$  (100 MHz, CDCl<sub>3</sub>) 51.8 (C(6)), 57.5 (NCH<sub>2</sub>Ph), 57.8 (C(2)CH<sub>2</sub>), 59.9 (C(2)), 67.6 (C(4)), 68.0 (C(5)), 72.2 (OCH<sub>2</sub>Ph), 76.5 (C(3)), 127.4, 128.0,

128.2, 128.5, 128.7, 128.8 (*o,m,p-Ph*), 137.5, 138.2 (*i-Ph*);  $m/z$  (ESI<sup>+</sup>) 344 ([M+H]<sup>+</sup>, 100%); HRMS (ESI<sup>+</sup>) C<sub>20</sub>H<sub>25</sub>NNaO<sub>4</sub><sup>+</sup> ([M+Na]<sup>+</sup>) requires 366.1676; found 366.1682.

**Method B (from 12) – Step 1:** I<sub>2</sub> (207 mg, 0.82 mmol) and NaHCO<sub>3</sub> (69.0 mg, 0.82 mmol) were added to a stirred solution of **12** (160 mg, 0.27 mmol, >99:1 dr) in dioxane/H<sub>2</sub>O (3:1, 4 mL) at rt and the resultant mixture was stirred at rt for 16 h. The reaction mixture was then diluted with Et<sub>2</sub>O (10 mL) and washed with satd aq Na<sub>2</sub>S<sub>2</sub>O<sub>3</sub> (10 mL), then dried and concentrated *in vacuo* to give a 73:27 mixture of **22** and **23** and benzylalcohol (127 mg).

**Step 2:** 6.0 M aq HCl (3 mL) was added to a stirred solution of the residue (127 mg) in MeOH (5 mL) and the resultant mixture was heated at 50 °C for 16 h before being concentrated *in vacuo*. The residue was dissolved in MeOH (5 mL) and K<sub>2</sub>CO<sub>3</sub> (752 mg, 5.44 mmol) was added to the resultant solution. The reaction mixture was then stirred at rt for 6 h, then concentrated *in vacuo*. The residue was then dissolved in H<sub>2</sub>O (10 mL) and the resultant solution was extracted with CHCl<sub>3</sub>/iPrOH (3:1, 3 × 5 mL). The combined organic extracts were then dried and concentrated *in vacuo*. Purification via flash column chromatography (eluent CHCl<sub>3</sub>/MeOH, 50:1) gave **25** as a white solid (37 mg, 39% from **12**, >99:1 dr).

#### (2*S*,3*S*,4*R*,5*R*)-1,5-Dideoxy-1,5-imino-D-allose [(+)-1-deoxyallonojirimycin] **26**

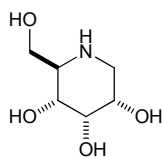

Pd(OH)<sub>2</sub>/C (32 mg) was added to a stirred solution of **25** (64 mg, 0.19 mmol, >99:1 dr) in degassed MeOH (4 mL) and the resultant suspension was stirred at rt for 48 h under an atmosphere of H<sub>2</sub> (5 atm). HCl (1.0 M in Et<sub>2</sub>O, 1 mL) was then added and the resultant suspension was stirred for a further 5 min before being filtered through Celite<sup>®</sup> (eluent MeOH) and concentrated *in vacuo*. Purification via ion exchange chromatography on Dowex-50WX8 resin (hydrogen form, 100–200 mesh, eluent H<sub>2</sub>O) gave **26** as a white solid (25 mg, 83%, >99:1dr); mp 162–164 °C; {lit.<sup>11</sup> mp 163 °C}; [α]<sub>D</sub><sup>20</sup> +28.3 (*c* 1.0 in H<sub>2</sub>O); [α]<sub>D</sub><sup>20</sup> +30.2 (*c* 1.0 in MeOH); {lit.<sup>12</sup> for sample isolated from a natural source [α]<sub>D</sub> +25.7 (*c* 0.65 in H<sub>2</sub>O); lit.<sup>13</sup> [α]<sub>D</sub><sup>25</sup> +30.5 (*c* 0.15 in H<sub>2</sub>O); lit.<sup>14</sup> [α]<sub>D</sub><sup>20</sup> +28.1 (*c* 0.8 in H<sub>2</sub>O); lit.<sup>15</sup> for enantiomer [α]<sub>D</sub> –37.0 (*c* 1.04 in MeOH); lit.<sup>16</sup> [α]<sub>D</sub><sup>25</sup> +35.1 (*c* 0.1 in

<sup>11</sup> Sridhar, R.; Srinivas, B.; Rao, K. *Tetrahedron* **2009**, *65*, 70701.

<sup>12</sup> Asano, N.; Oseki, K.; Kizu, H.; Matsui, K. *J. Med. Chem.* **1994**, *37*, 3701.

<sup>13</sup> Hong, B.-C.; Chen, Z.-Y.; Nagarajan, A.; Kottani, R.; Chavan, V.; Chen, W.-H.; Jiang, Y.-F.; Zhang, S.-C.; Liaoa, J.-H.; Sarsharb, S. *Carbohydr. Res.* **2005**, *340*, 2457.

<sup>14</sup> Ikota, N.; Hirano, J.-I.; Gamage, R.; Nakagawa, H.; Hama-Inaba, H. *Heterocycles* **1997**, *46*, 637.

<sup>15</sup> Kato, A.; Kato, N.; Kano, E.; Adachi, I.; Ikeda, K.; Yu, L.; Okamoto, T.; Banba, Y.; Ouchi, H.; Takahata, H.; Asano, N. *J. Med. Chem.* **2005**, *48*, 2036.

<sup>16</sup> Sridhar, R.; Srinivas, B.; Rao, K. *Tetrahedron* **2009**, *65*, 70701.

MeOH); lit.<sup>17</sup>  $[\alpha]_D +34.0$  (*c* 0.1 in MeOH)};  $\nu_{\max}$  (ATR) 3275 (O–H), 2873 (C–H);  $\delta_H$  (400 MHz, D<sub>2</sub>O) 2.65 (1H, app t, *J* 11.8, C(1)*H*<sub>A</sub>), 2.70 (1H, ddd, *J* 10.2, 5.8, 2.8, C(5)*H*), 2.81 (1H, dd, *J* 11.8, 5.0, C(1)*H*<sub>B</sub>), 3.43 (1H, dd, *J* 10.2, 2.8, C(4)*H*), 3.60 (1H, dd, *J* 11.8, 5.8, C(6)*CH*<sub>A</sub>), 3.65 (1H, ddd, *J* 11.8, 5.0, 2.8, C(2)*H*), 3.75 (1H, dd, *J* 11.8, 2.8, C(6)*H*<sub>B</sub>), 4.04 (1H, app t, *J* 2.8, C(3)*H*);  $\delta_C$  (100 MHz, D<sub>2</sub>O) 43.4 (C(1)), 54.4 (C(5)), 60.9 (C(6)), 67.8 (C(2)), 68.3 (C(4)), 71.3 (C(3)); *m/z* (FI<sup>+</sup>) 163 ([M]<sup>+</sup>, 100%); HRMS (FI<sup>+</sup>) C<sub>6</sub>H<sub>13</sub>NO<sub>4</sub><sup>+</sup> ([M]<sup>+</sup>) requires 163.0839; found 163.0852.

---

<sup>17</sup> Kim, I. S.; Lee, H. Y.; Jung, Y. H. *Heterocycles* **2007**, *71*, 1787.

## 2. X-ray crystal structure determination for **13**, **19-CHCl<sub>3</sub>** and **25**

Data were collected using either an Oxford Diffraction SuperNova diffractometer with graphite monochromated Cu-K $\alpha$  radiation (for **13** and **25**), or a Nonius  $\kappa$ -CCD diffractometer with graphite monochromated Mo-K $\alpha$  radiation (for **19-CHCl<sub>3</sub>**), using standard procedures at 150 K. The structures were solved by direct methods (SIR92); all non-hydrogen atoms were refined with anisotropic thermal parameters. Hydrogen atoms were added at idealised positions. The structure was refined using CRYSTALS.<sup>18,19</sup>

X-ray crystal structure data for **13** [C<sub>28</sub>H<sub>33</sub>NO<sub>3</sub>]:  $M = 431.57$ , monoclinic, space group  $P 2_1$ ,  $a = 12.8417(4)$  Å,  $b = 6.6522(1)$  Å,  $c = 14.8628(5)$  Å,  $\beta = 109.357(4)^\circ$ ,  $V = 1197.89(6)$  Å<sup>3</sup>,  $Z = 2$ ,  $\mu = 0.605$  mm<sup>-1</sup>, colourless block, crystal dimensions =  $0.05 \times 0.06 \times 0.19$  mm. A total of 4855 unique reflections were measured for  $3 < \theta < 80$  and 4265 reflections were used in the refinement. The final parameters were  $wR_2 = 0.110$  and  $R_1 = 0.047$  [ $I > -3.0\sigma(I)$ ].

X-ray crystal structure data for **19-CHCl<sub>3</sub>** [C<sub>21</sub>H<sub>26</sub>Cl<sub>3</sub>NO<sub>4</sub>]:  $M = 462.80$ , monoclinic, space group  $P 2_1$ ,  $a = 11.1676(4)$  Å,  $b = 8.2551(3)$  Å,  $c = 12.4524(5)$  Å,  $\beta = 90.8174(16)^\circ$ ,  $V = 1147.87(7)$  Å<sup>3</sup>,  $Z = 2$ ,  $\mu = 0.425$  mm<sup>-1</sup>, colourless block, crystal dimensions =  $0.23 \times 0.26 \times 0.27$  mm. A total of 5050 unique reflections were measured for  $5 < \theta < 27$  and 2656 reflections were used in the refinement. The final parameters were  $wR_2 = 0.062$  and  $R_1 = 0.051$  [ $I > -3.0\sigma(I)$ ], with Flack enantiopole =  $-0.09(12)$ .<sup>20</sup>

X-ray crystal structure data for **25** [C<sub>20</sub>H<sub>25</sub>NO<sub>4</sub>]:  $M = 343.43$ , monoclinic, space group  $P 2_1$ ,  $a = 10.3223(3)$  Å,  $b = 6.9861(2)$  Å,  $c = 12.9927(3)$  Å,  $\beta = 101.708(3)^\circ$ ,  $V = 917.44(4)$  Å<sup>3</sup>,  $Z = 2$ ,  $\mu = 0.698$  mm<sup>-1</sup>, colourless block, crystal dimensions =  $0.07 \times 0.09 \times 0.16$  mm. A total of 3813 unique reflections were measured for  $3 < \theta < 77$  and 3796 reflections were used in the refinement. The final parameters were  $wR_2 = 0.064$  and  $R_1 = 0.033$  [ $I > -3.0\sigma(I)$ ], with Flack enantiopole =  $-0.05(16)$ .<sup>20</sup>

<sup>18</sup> Betteridge, P. W.; Carruthers, J. R.; Cooper, R. I.; Prout, C. K.; Watkin, D. J. *J. Appl. Crystallogr.* **2003**, *36*, 1487.

<sup>19</sup> Crystallographic data (excluding structure factors) for compounds **13**, **19-CHCl<sub>3</sub>** and **25** have been deposited with the Cambridge Crystallographic Data Centre as supplementary publication numbers CCDC 926152–926154, respectively. Copies of these data can be obtained free of charge from The Cambridge Crystallographic Data Centre via [www.ccdc.cam.ac.uk/data\\_request/cif](http://www.ccdc.cam.ac.uk/data_request/cif)

<sup>20</sup> (a) Flack, H. D. *Acta. Crystallogr., Sect. A* **1983**, *39*, 876. (b) Flack, H. D.; Bernardelli, G. *Acta.*

*Crystallogr., Sect. A* **1999**, *55*, 908. (c) Flack, H. D.; Bernardinelli, G. *J. Appl. Crystallogr.* **2000**, *33*, 1143.

### 3. Copies of $^1\text{H}$ and $^{13}\text{C}$ NMR spectra

(*R,R,R,R*)-4-Benzyloxy-5-[*N*-benzyl-*N*-( $\alpha$ -methylbenzyl)amino]-6-(triisopropylsilyloxy)hex-1-en-3-ol 11 (400 MHz  $^1\text{H}$ ,  $\text{CDCl}_3$ )

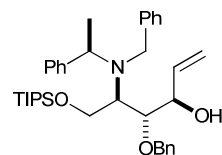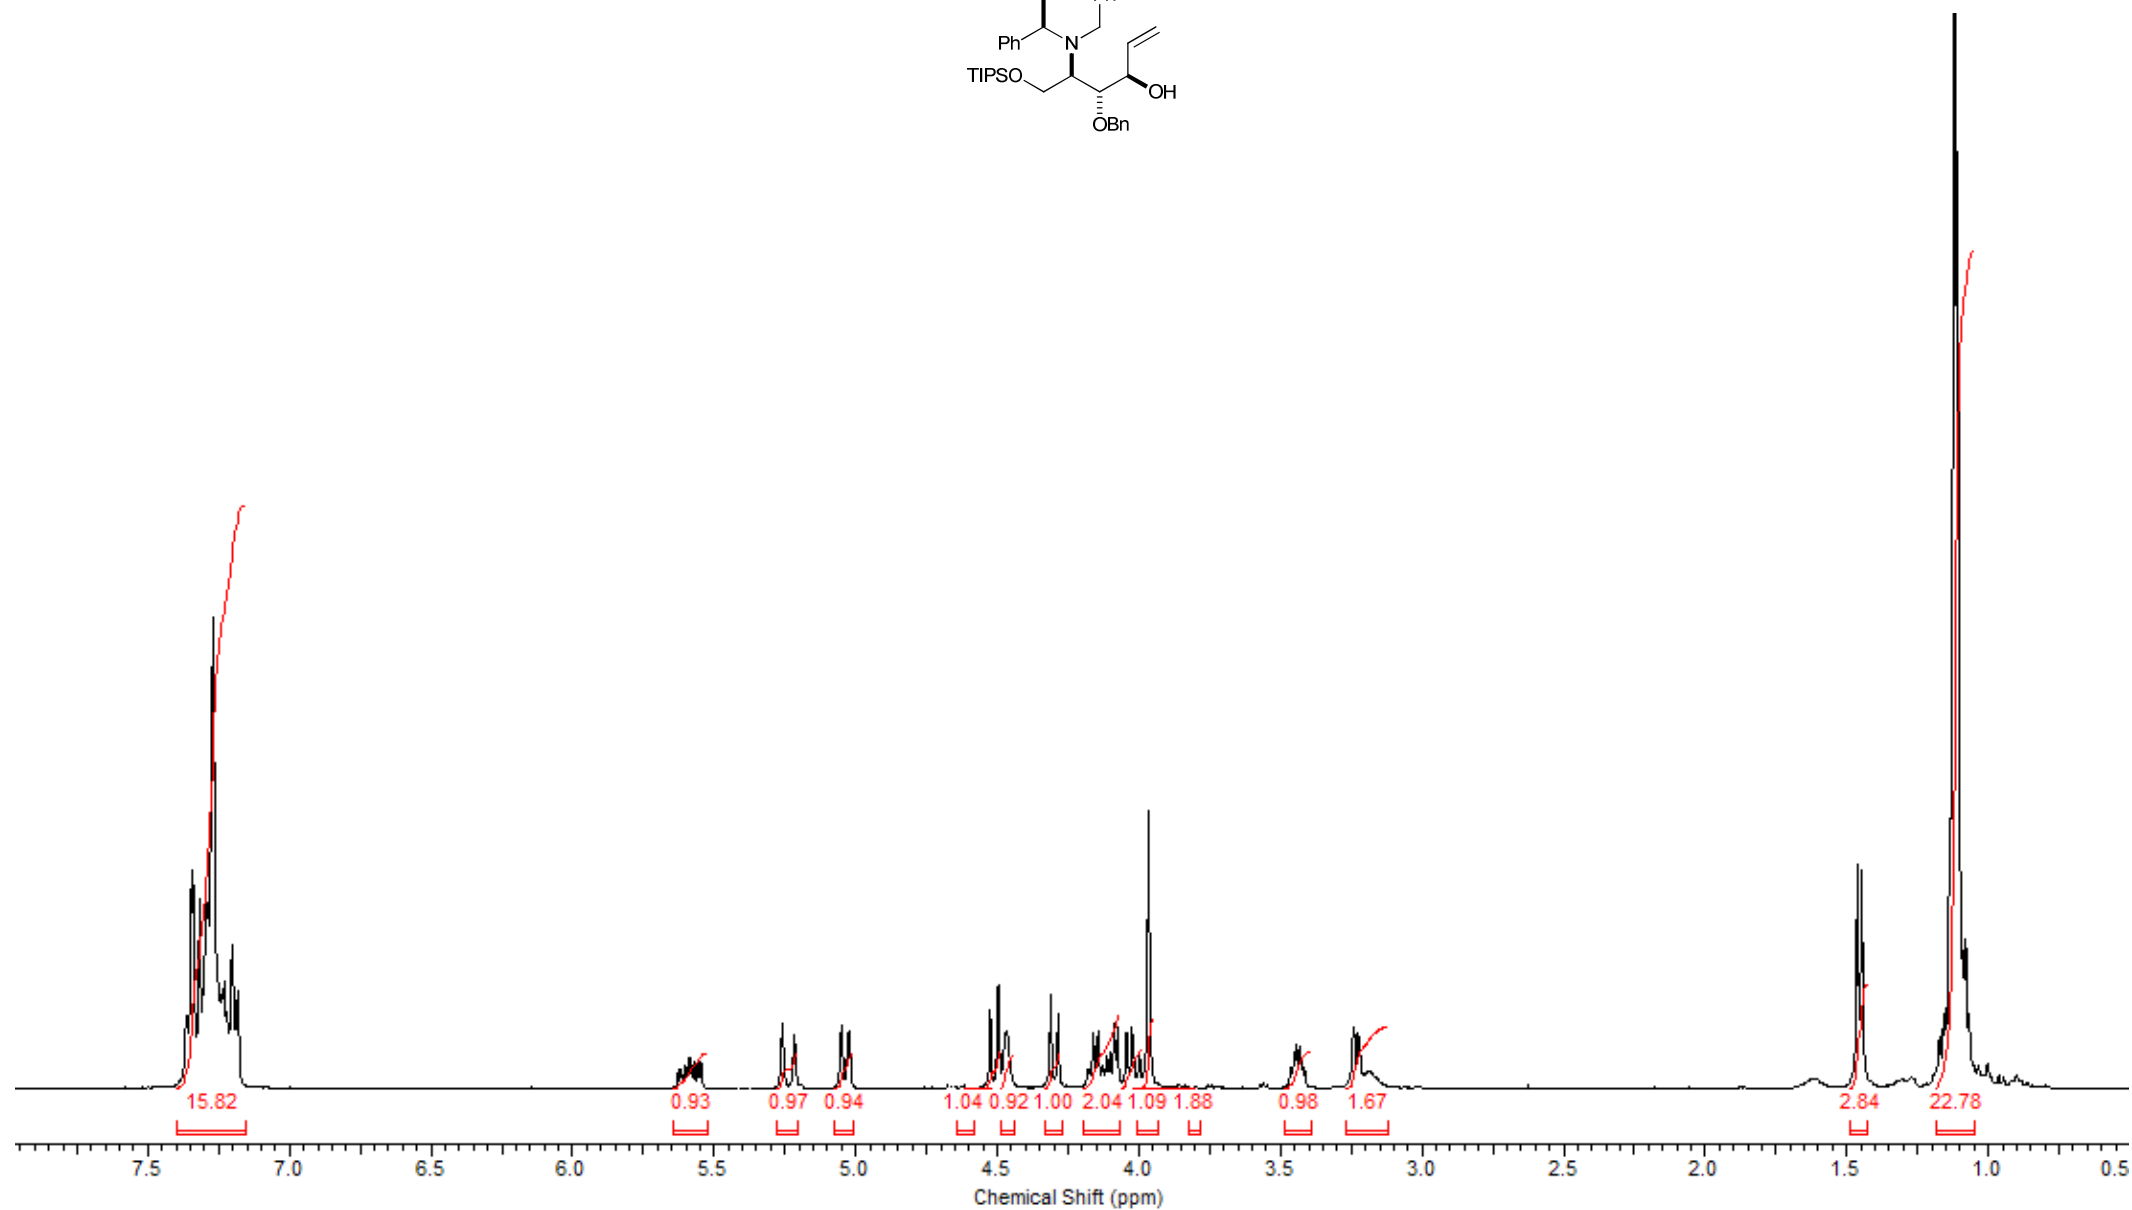

(*R,R,R,R*)-4-Benzyloxy-5-[*N*-benzyl-*N*-( $\alpha$ -methylbenzyl)amino]-6-(triisopropylsilyloxy)hex-1-en-3-ol 11 (100 MHz  $^{13}\text{C}$ ,  $\text{CDCl}_3$ )

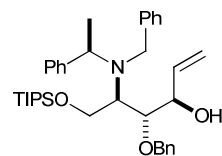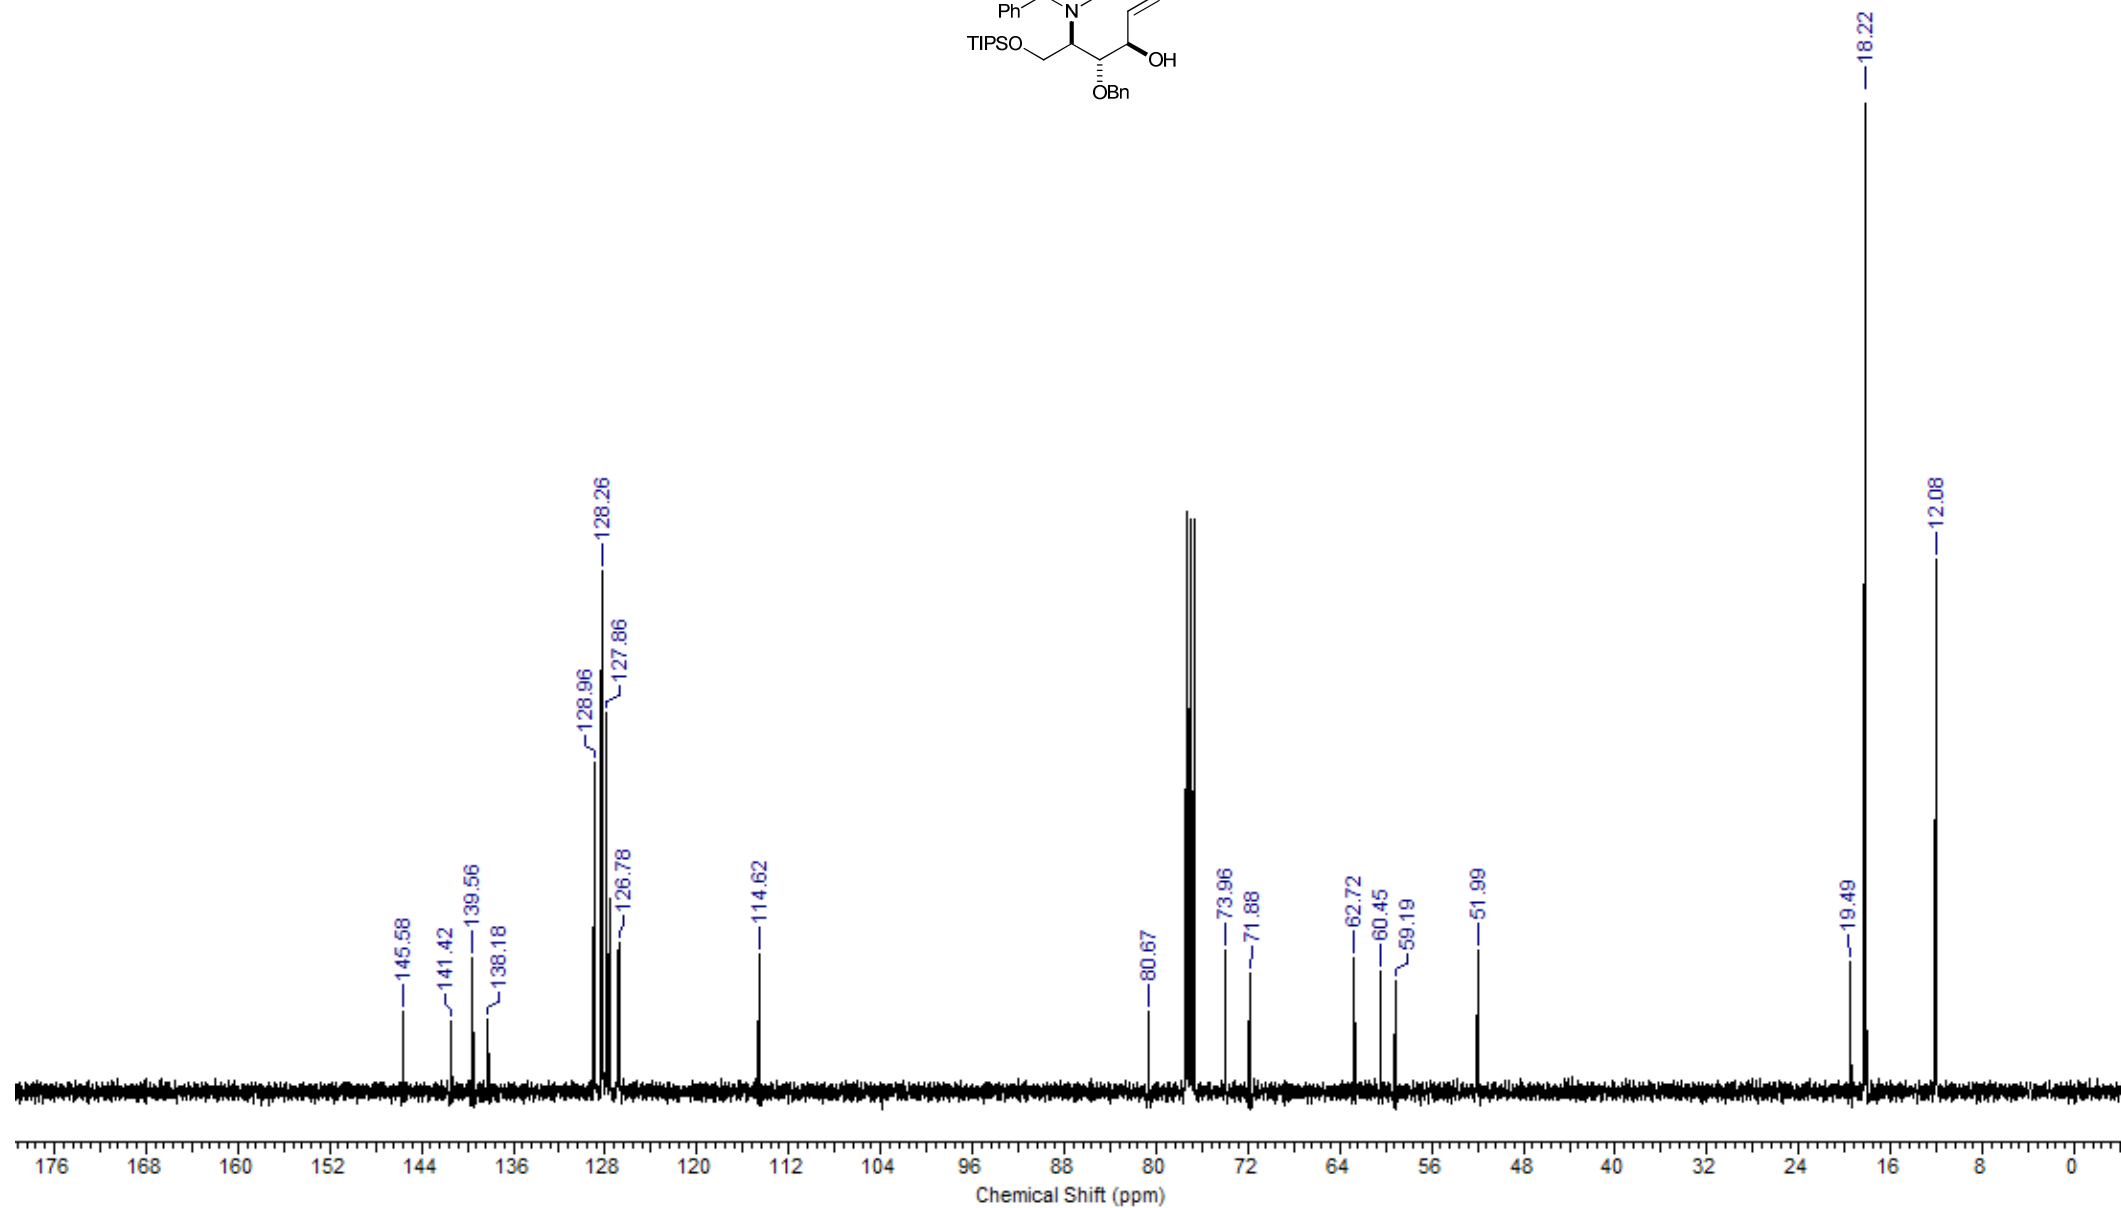

**(3*S*,4*R*,5*R*, $\alpha$ *R*)-4-Benzoyloxy-5-[*N*-benzyl-*N*-( $\alpha$ -methylbenzyl)amino]-6-(triisopropylsilyloxy)hex-1-en-3-ol 12 (400 MHz  $^1\text{H}$ ,  $\text{CDCl}_3$ )**

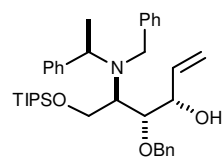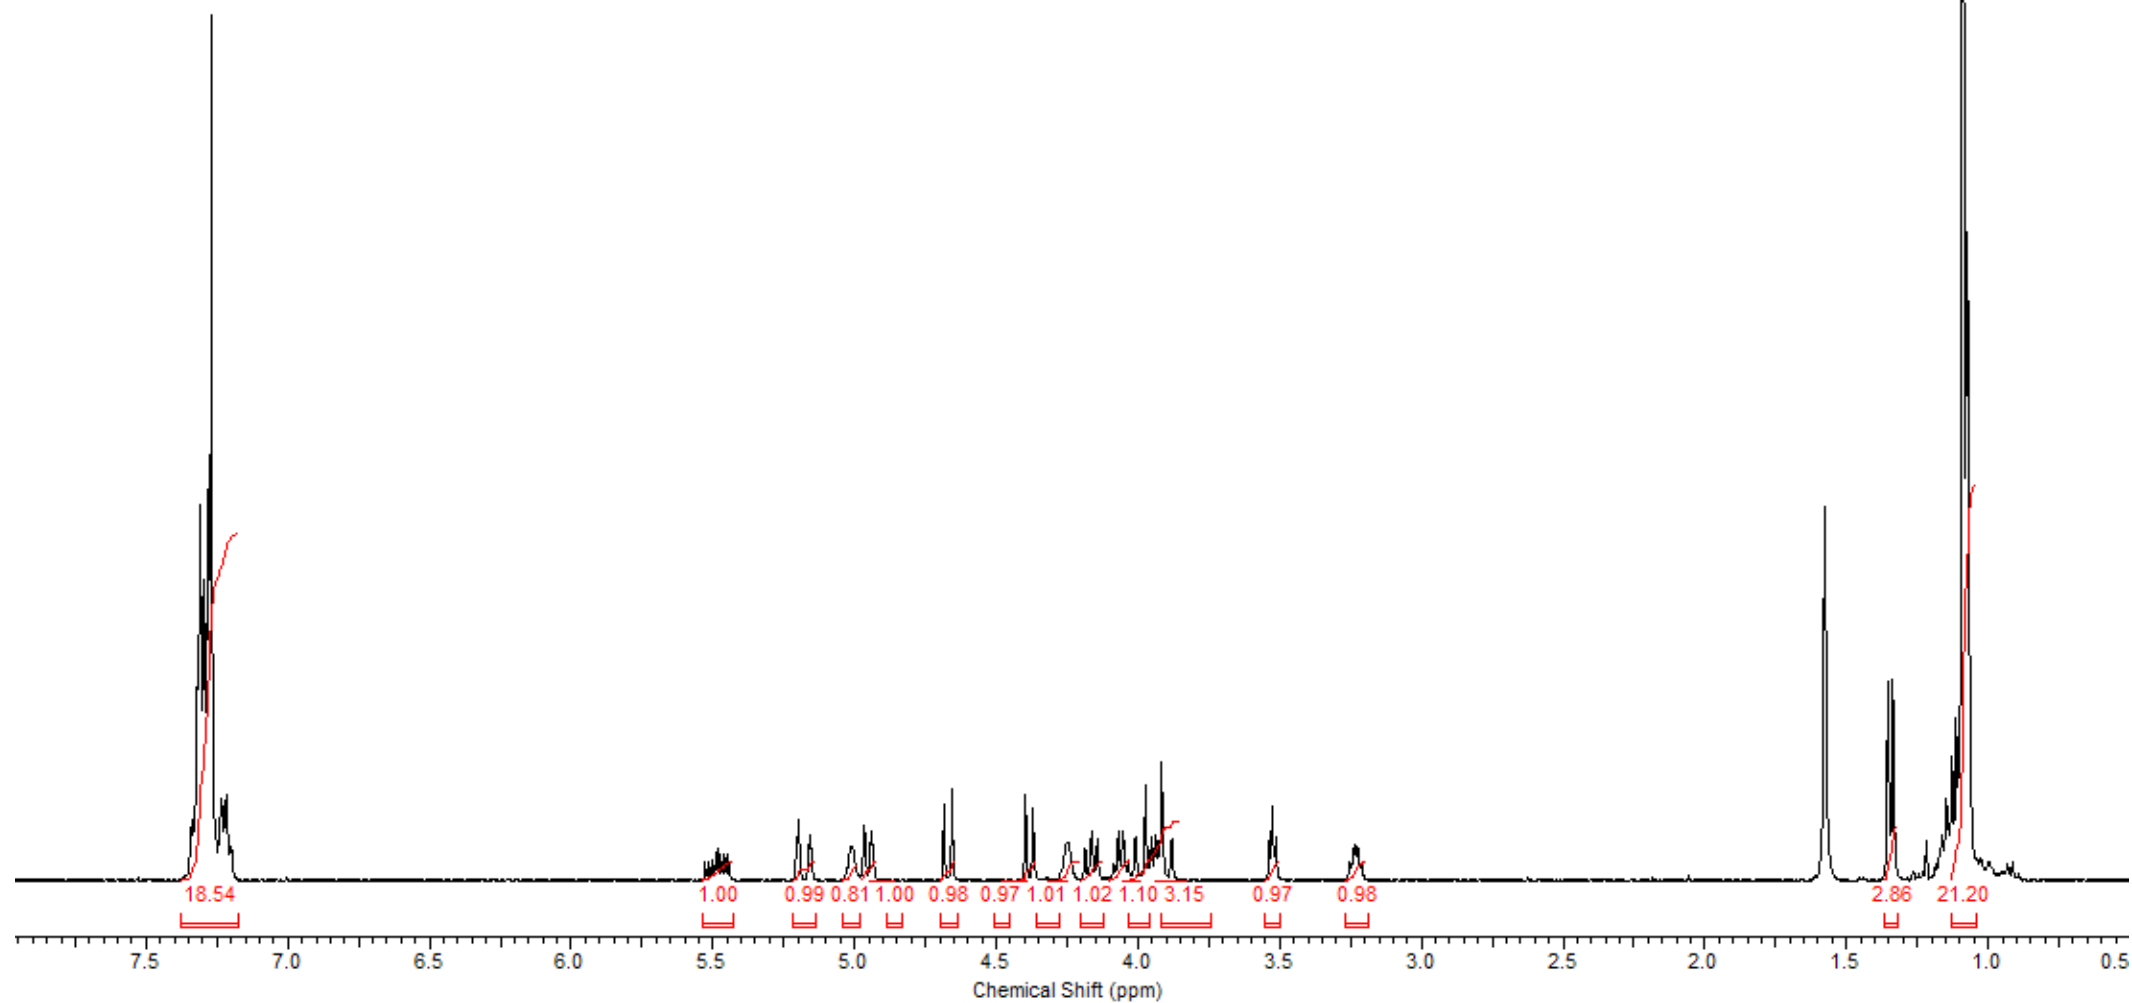

**(3*S*,4*R*,5*R*, $\alpha$ *R*)-4-Benzoyloxy-5-[*N*-benzyl-*N*-( $\alpha$ -methylbenzyl)amino]-6-(triisopropylsilyloxy)hex-1-en-3-ol 12** (100 MHz  $^{13}\text{C}$ ,  $\text{CDCl}_3$ )

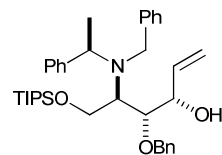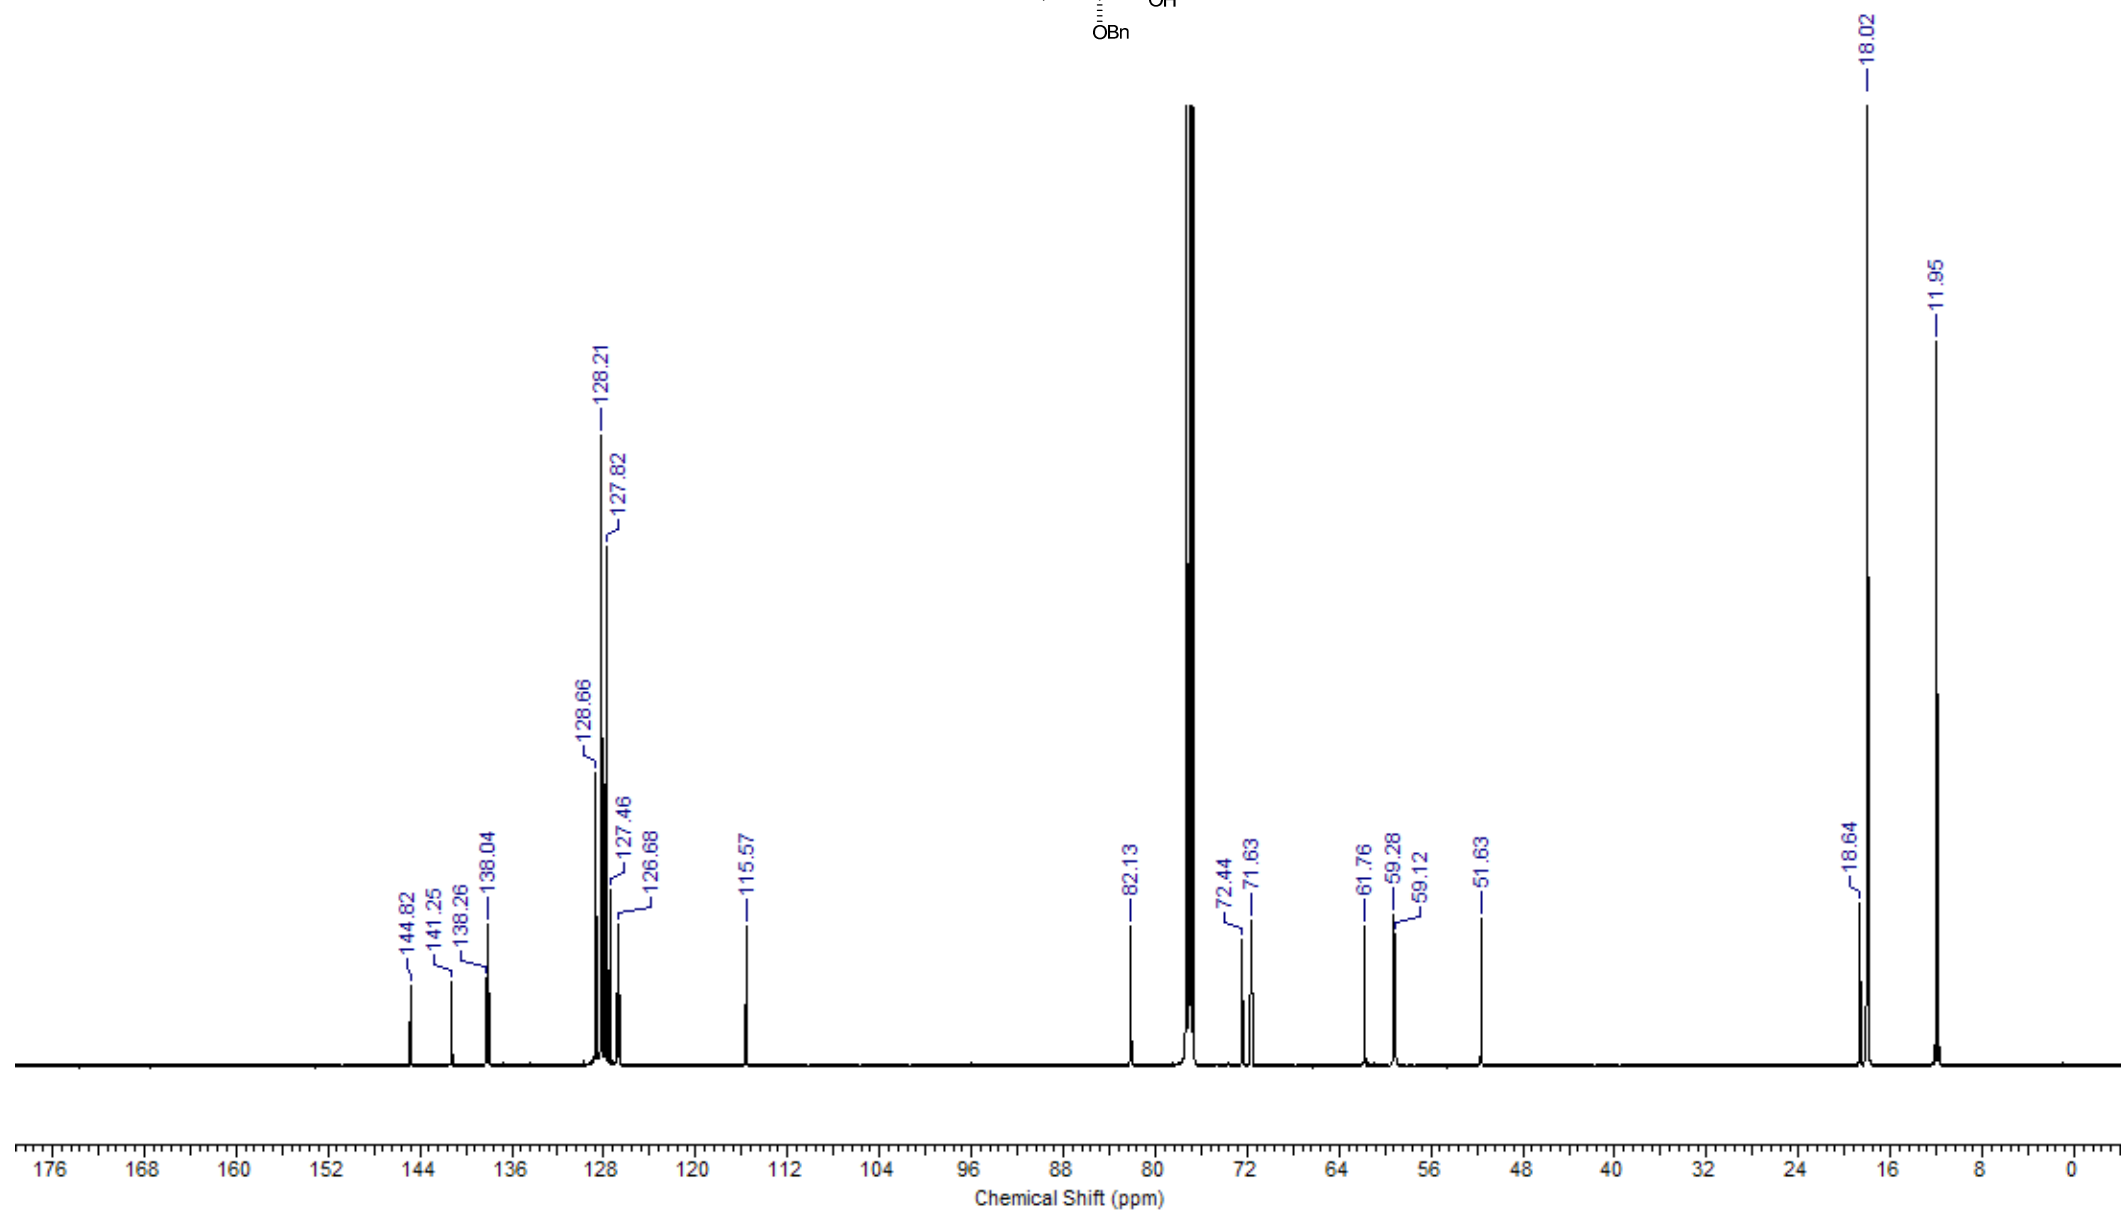

**(*R,R,R,R*)-4-Benzyloxy-5-[*N*-benzyl-*N*-( $\alpha$ -methylbenzyl)amino]hex-1-en-3,6-diol 13 (400 MHz  $^1\text{H}$ ,  $\text{CDCl}_3$ )**

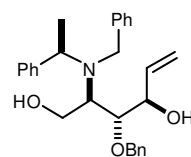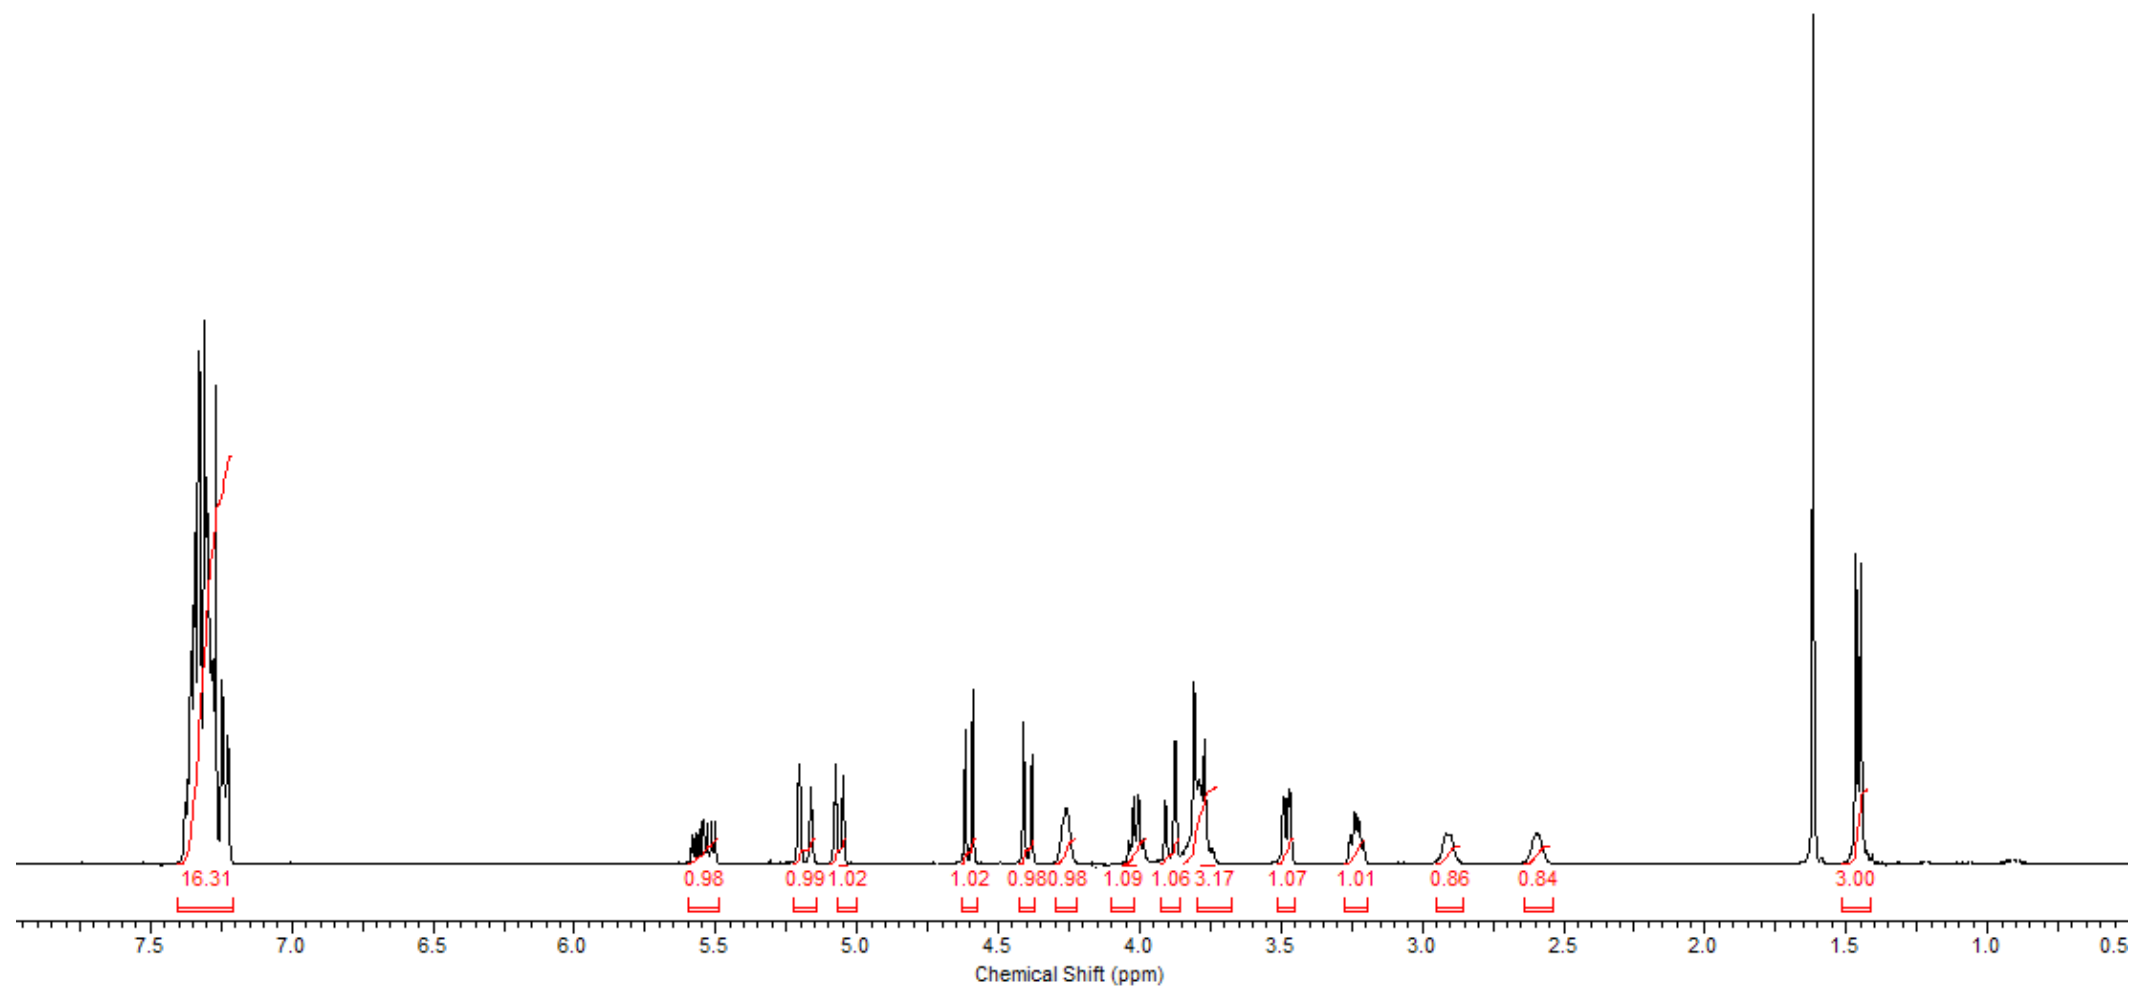

(*R,R,R,R*)-4-Benzyloxy-5-[*N*-benzyl-*N*-( $\alpha$ -methylbenzyl)amino]hex-1-en-3,6-diol 13 (100 MHz  $^{13}\text{C}$ ,  $\text{CDCl}_3$ )

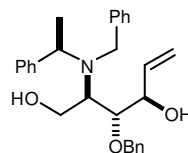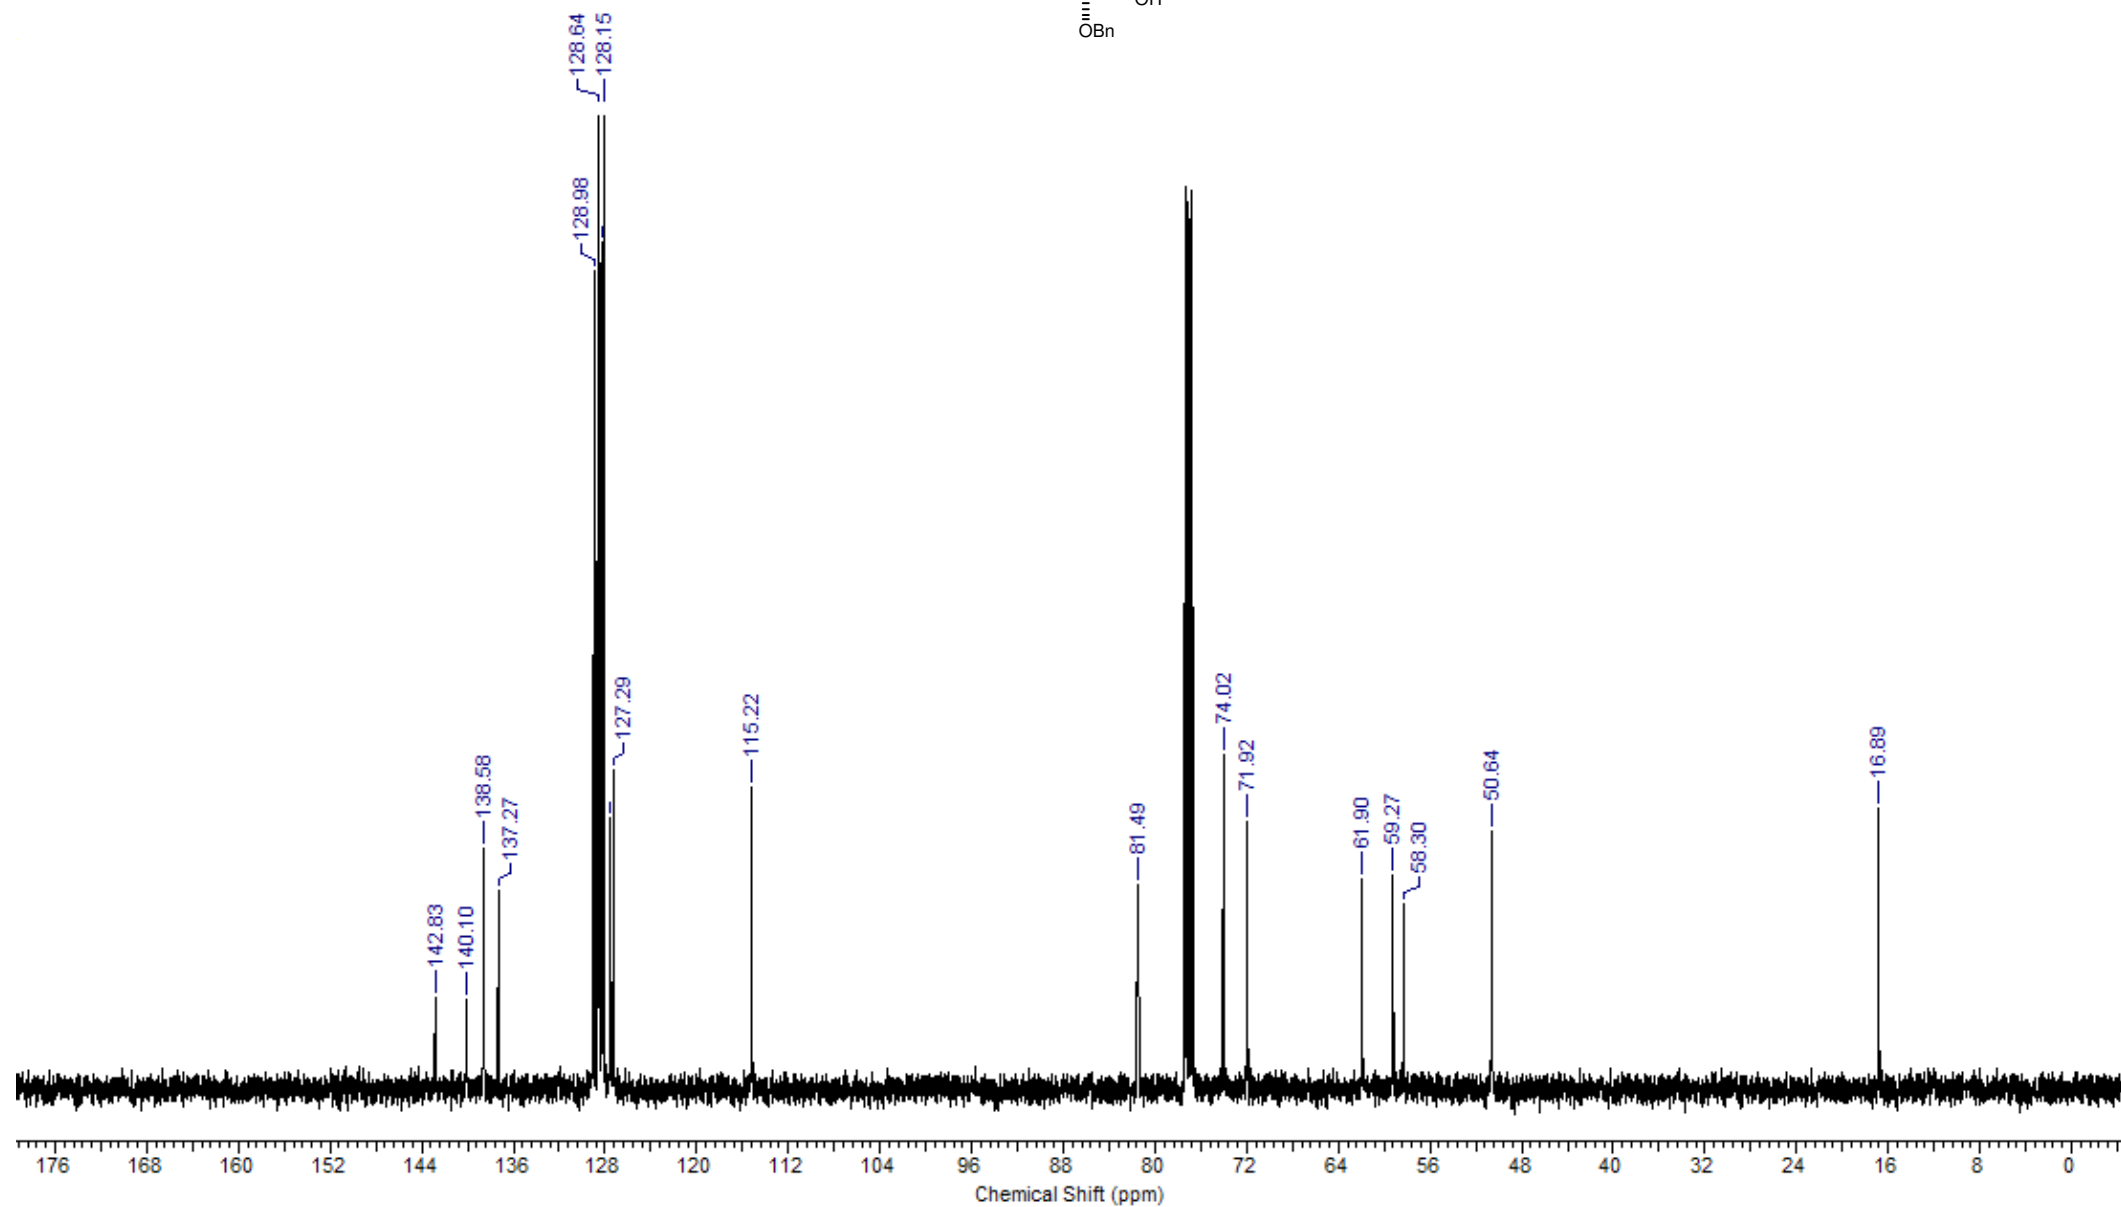

**(*R,R,R,R*)-*N*(1)-Benzyl-2-[(triisopropylsilyloxy)methyl]-3-benzyloxy-4-hydroxy-5-(iodomethyl)pyrrolidine 14 (400 MHz  $^1\text{H}$ ,  $\text{CDCl}_3$ )**

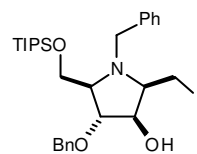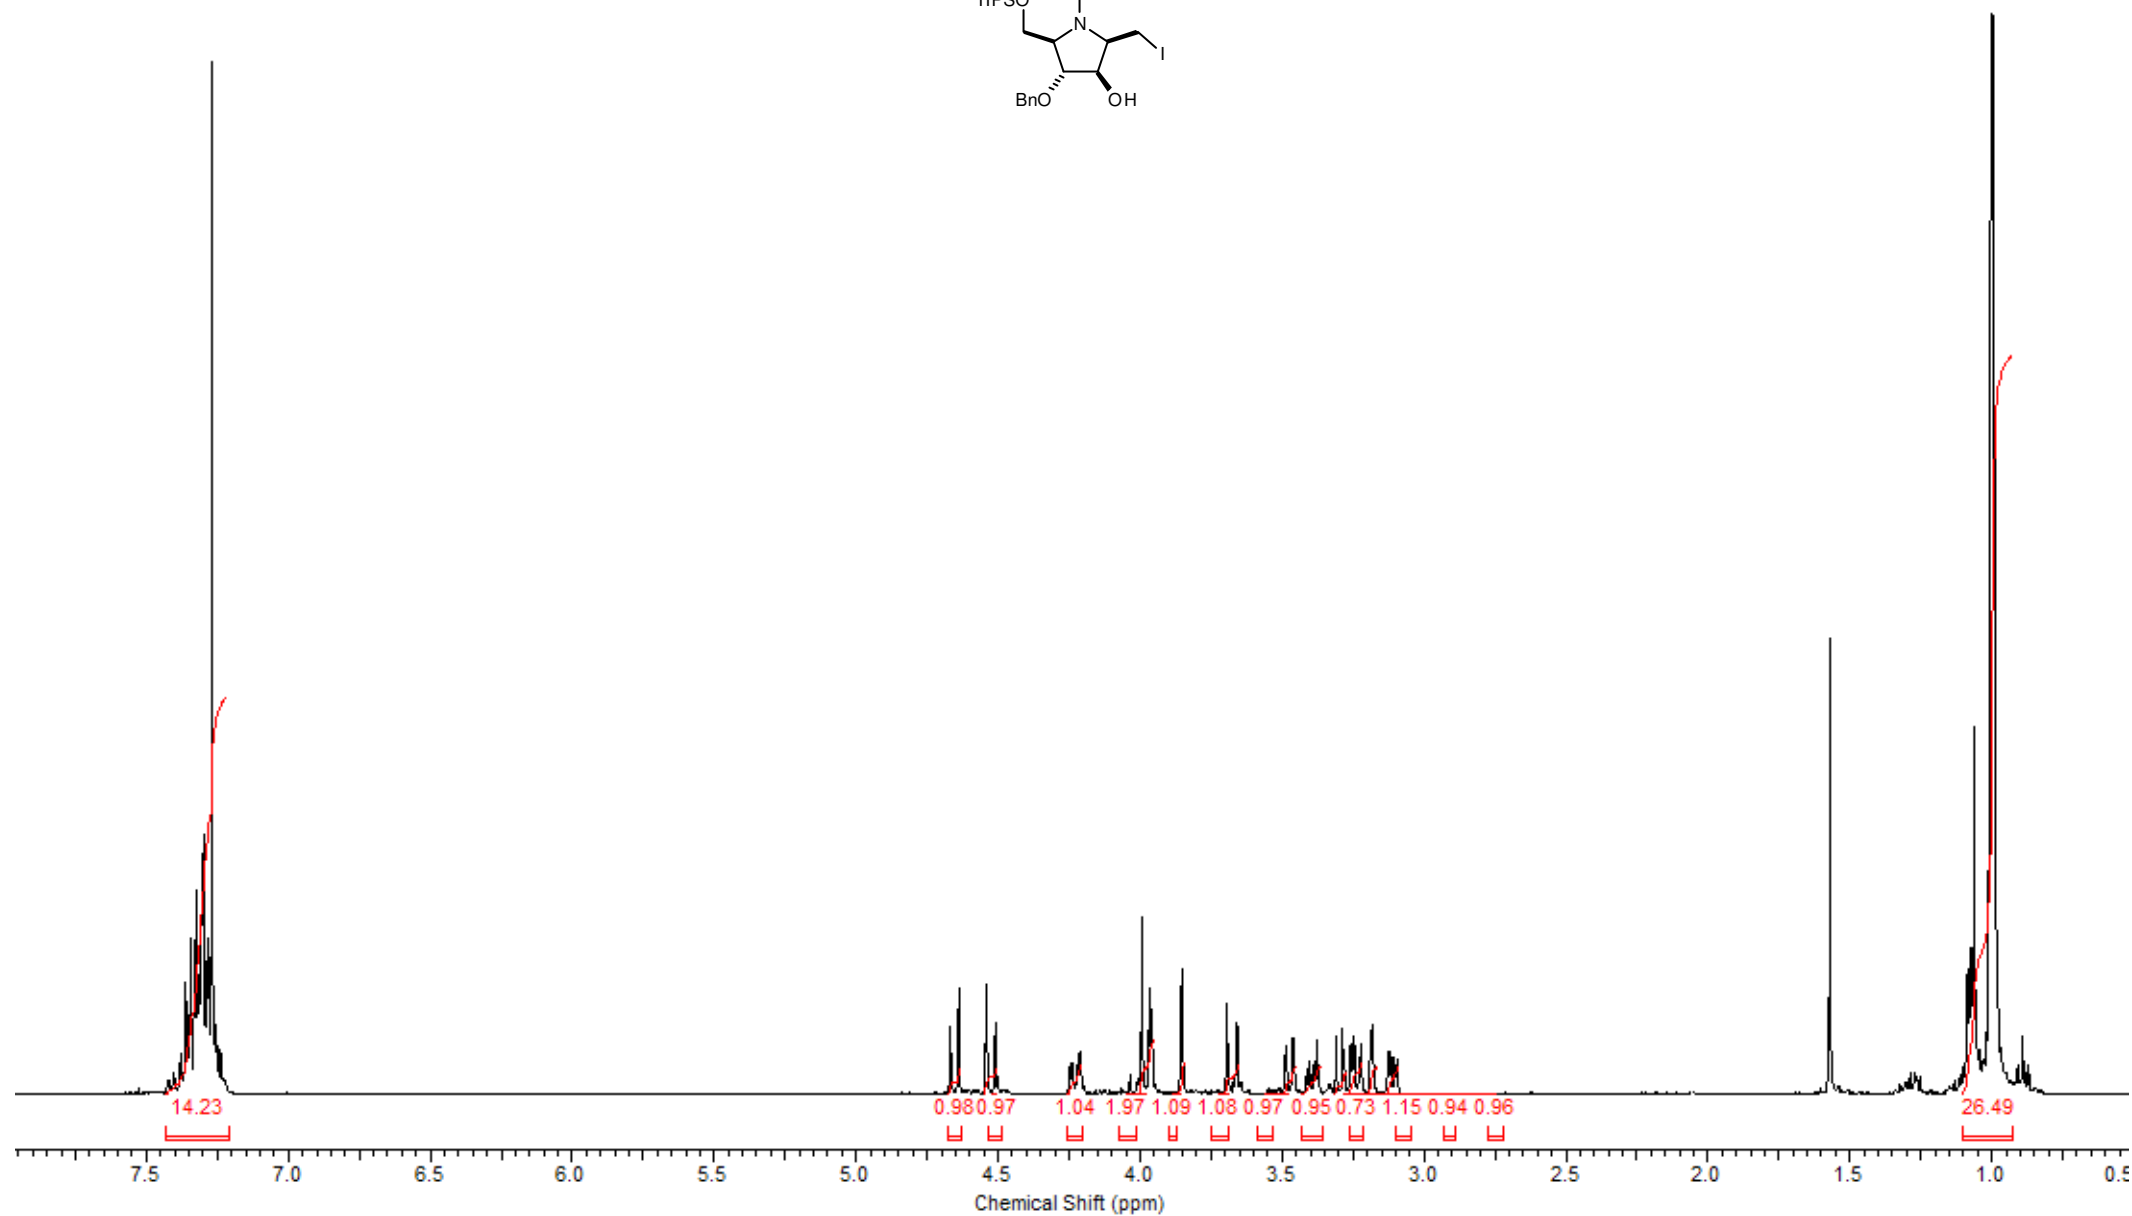

**(*R,R,R,R*)-*N*(1)-Benzyl-2-[(triisopropylsilyloxy)methyl]-3-benzyloxy-4-hydroxy-5-(iodomethyl)pyrrolidine 14 (100 MHz  $^{13}\text{C}$ ,  $\text{CDCl}_3$ )**

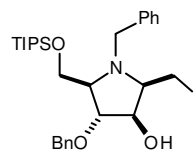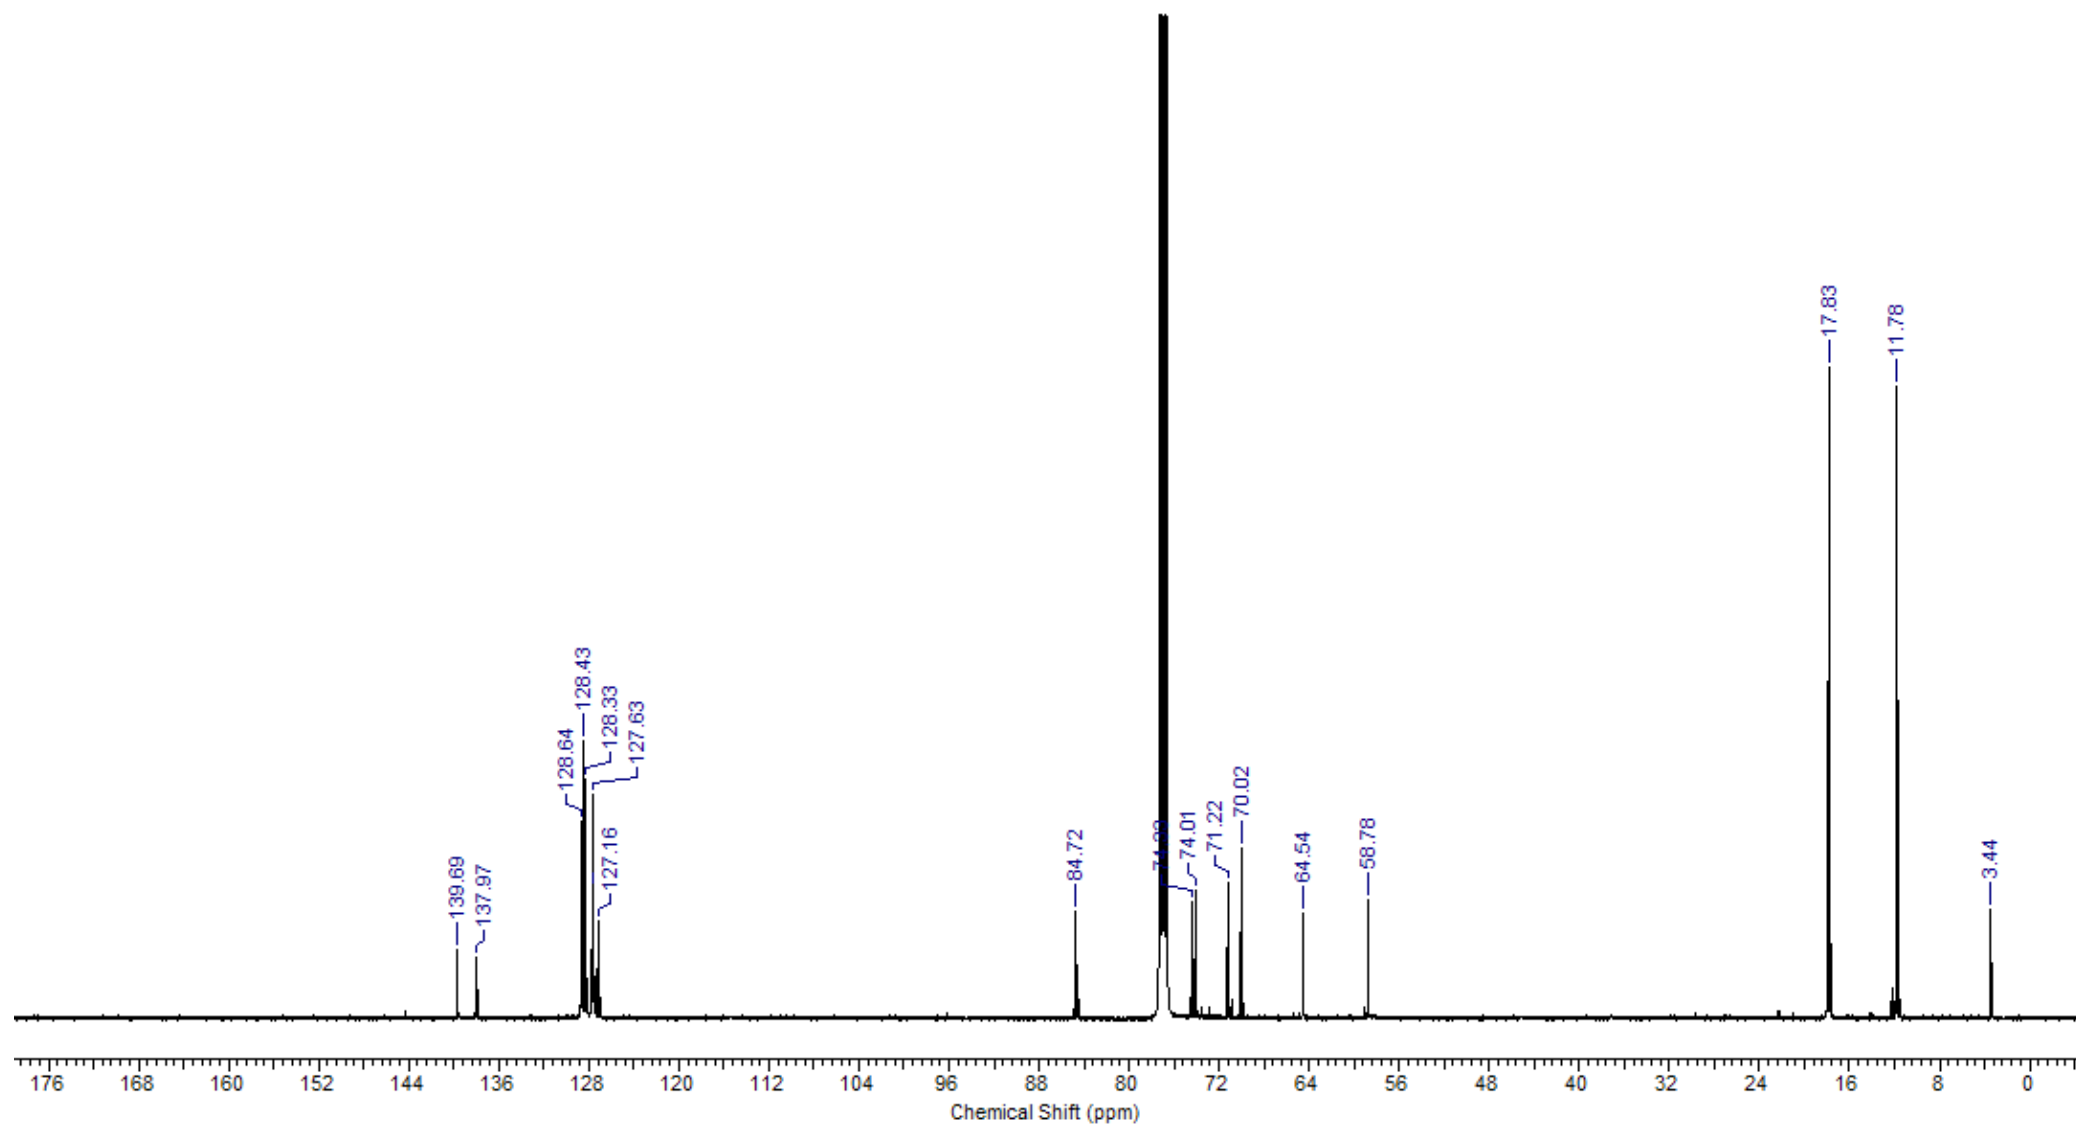

**(1*S*,2*R*,3*R*,4*R*,5*S*)-*N*(1)-Benzyl-2-[(triisopropylsilyloxy)methyl]-3-benzyloxy-4-hydroxy-1-azabicyclo[3.1.0]hexanium tetrafluoroborate 15**  
(400 MHz  $^1\text{H}$ ,  $\text{CD}_2\text{Cl}_2$ )

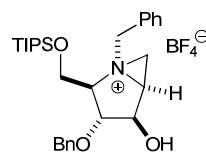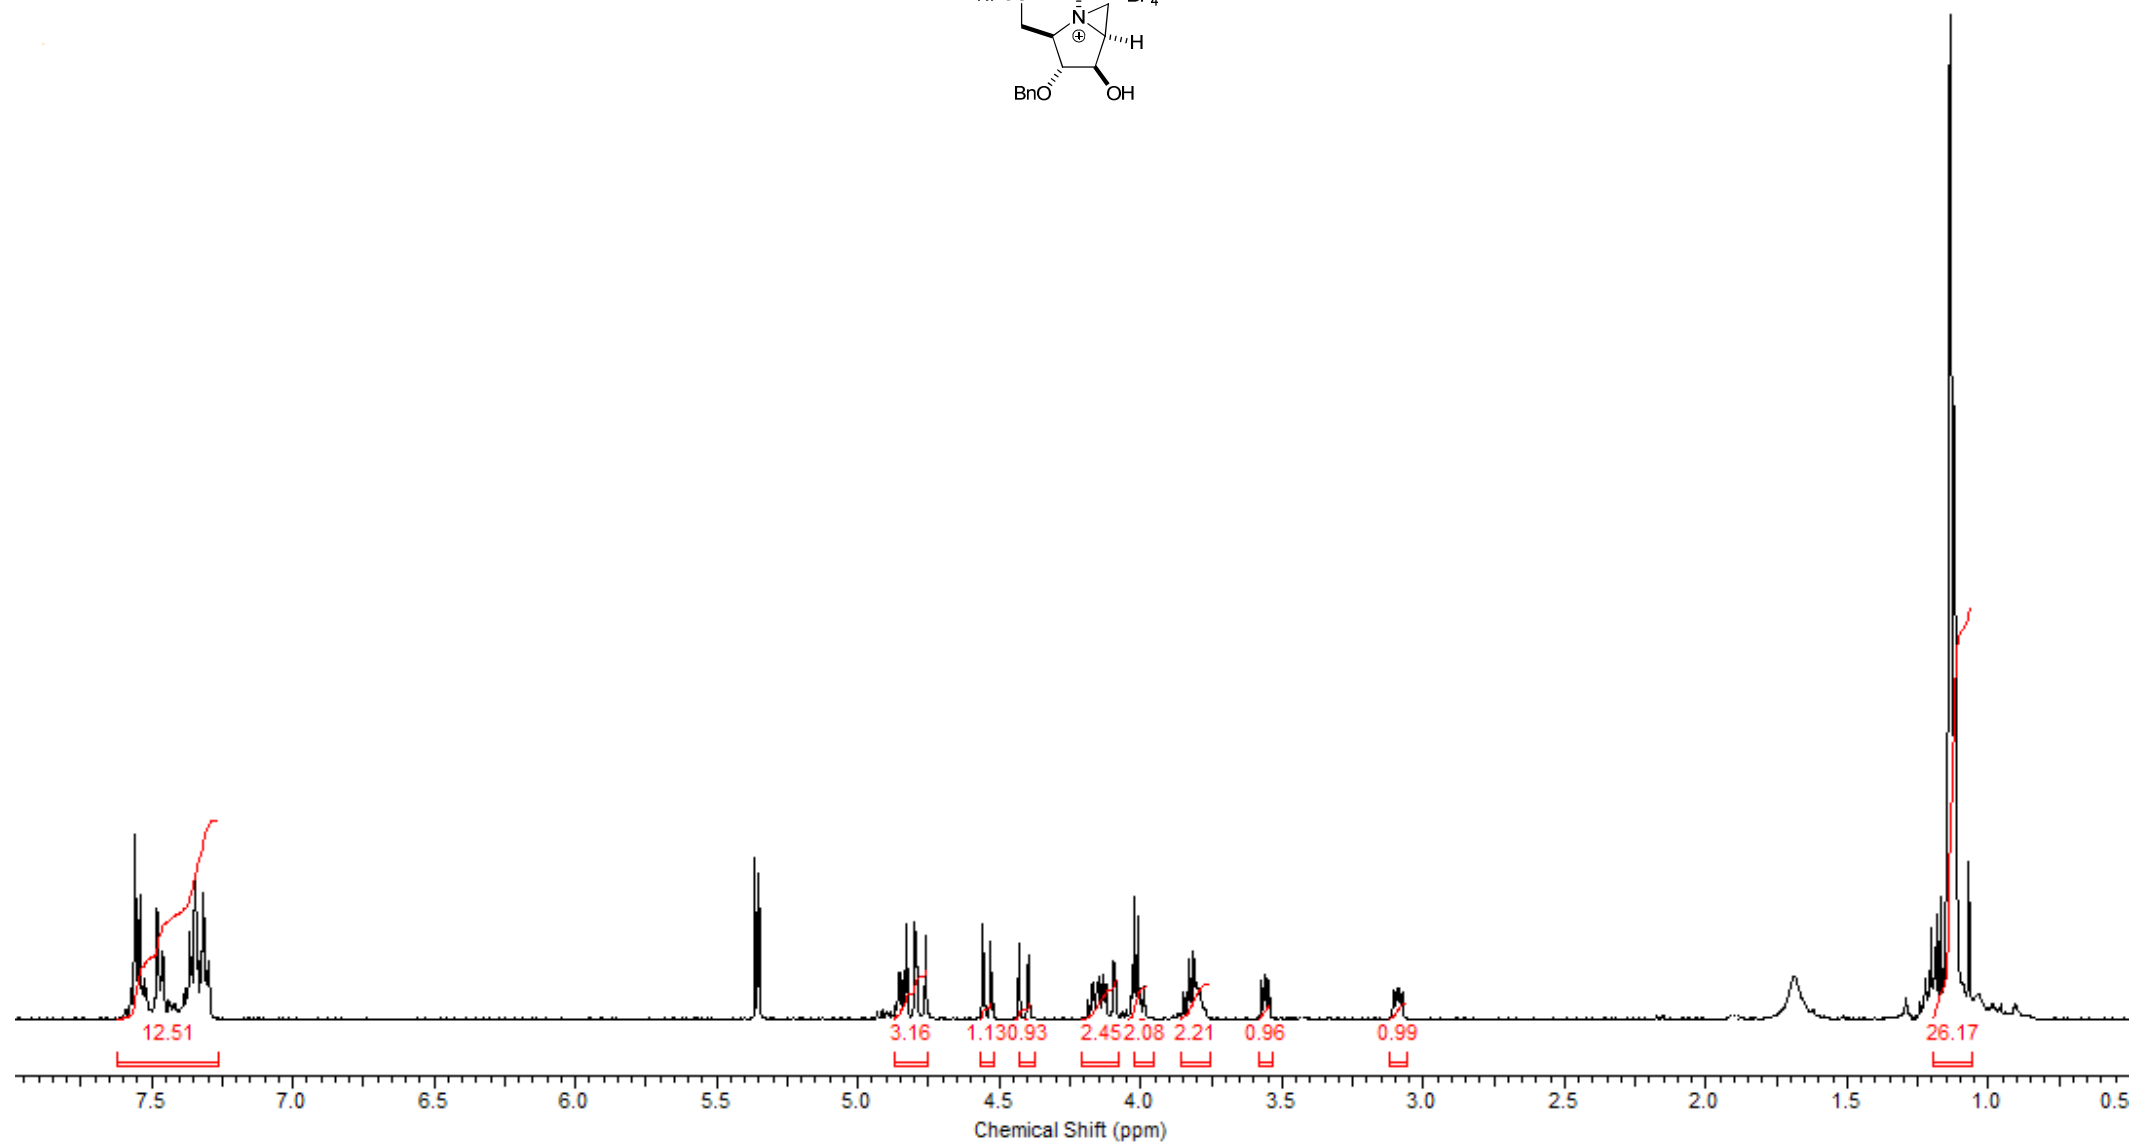

**(1*S*,2*R*,3*R*,4*R*,5*S*)-*N*(1)-Benzyl-2-[(triisopropylsilyloxy)methyl]-3-benzyloxy-4-hydroxy-1-azabicyclo[3.1.0]hexanium tetrafluoroborate 15**  
**(100 MHz  $^{13}\text{C}$ ,  $\text{CD}_2\text{Cl}_2$ )**

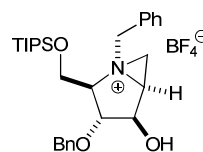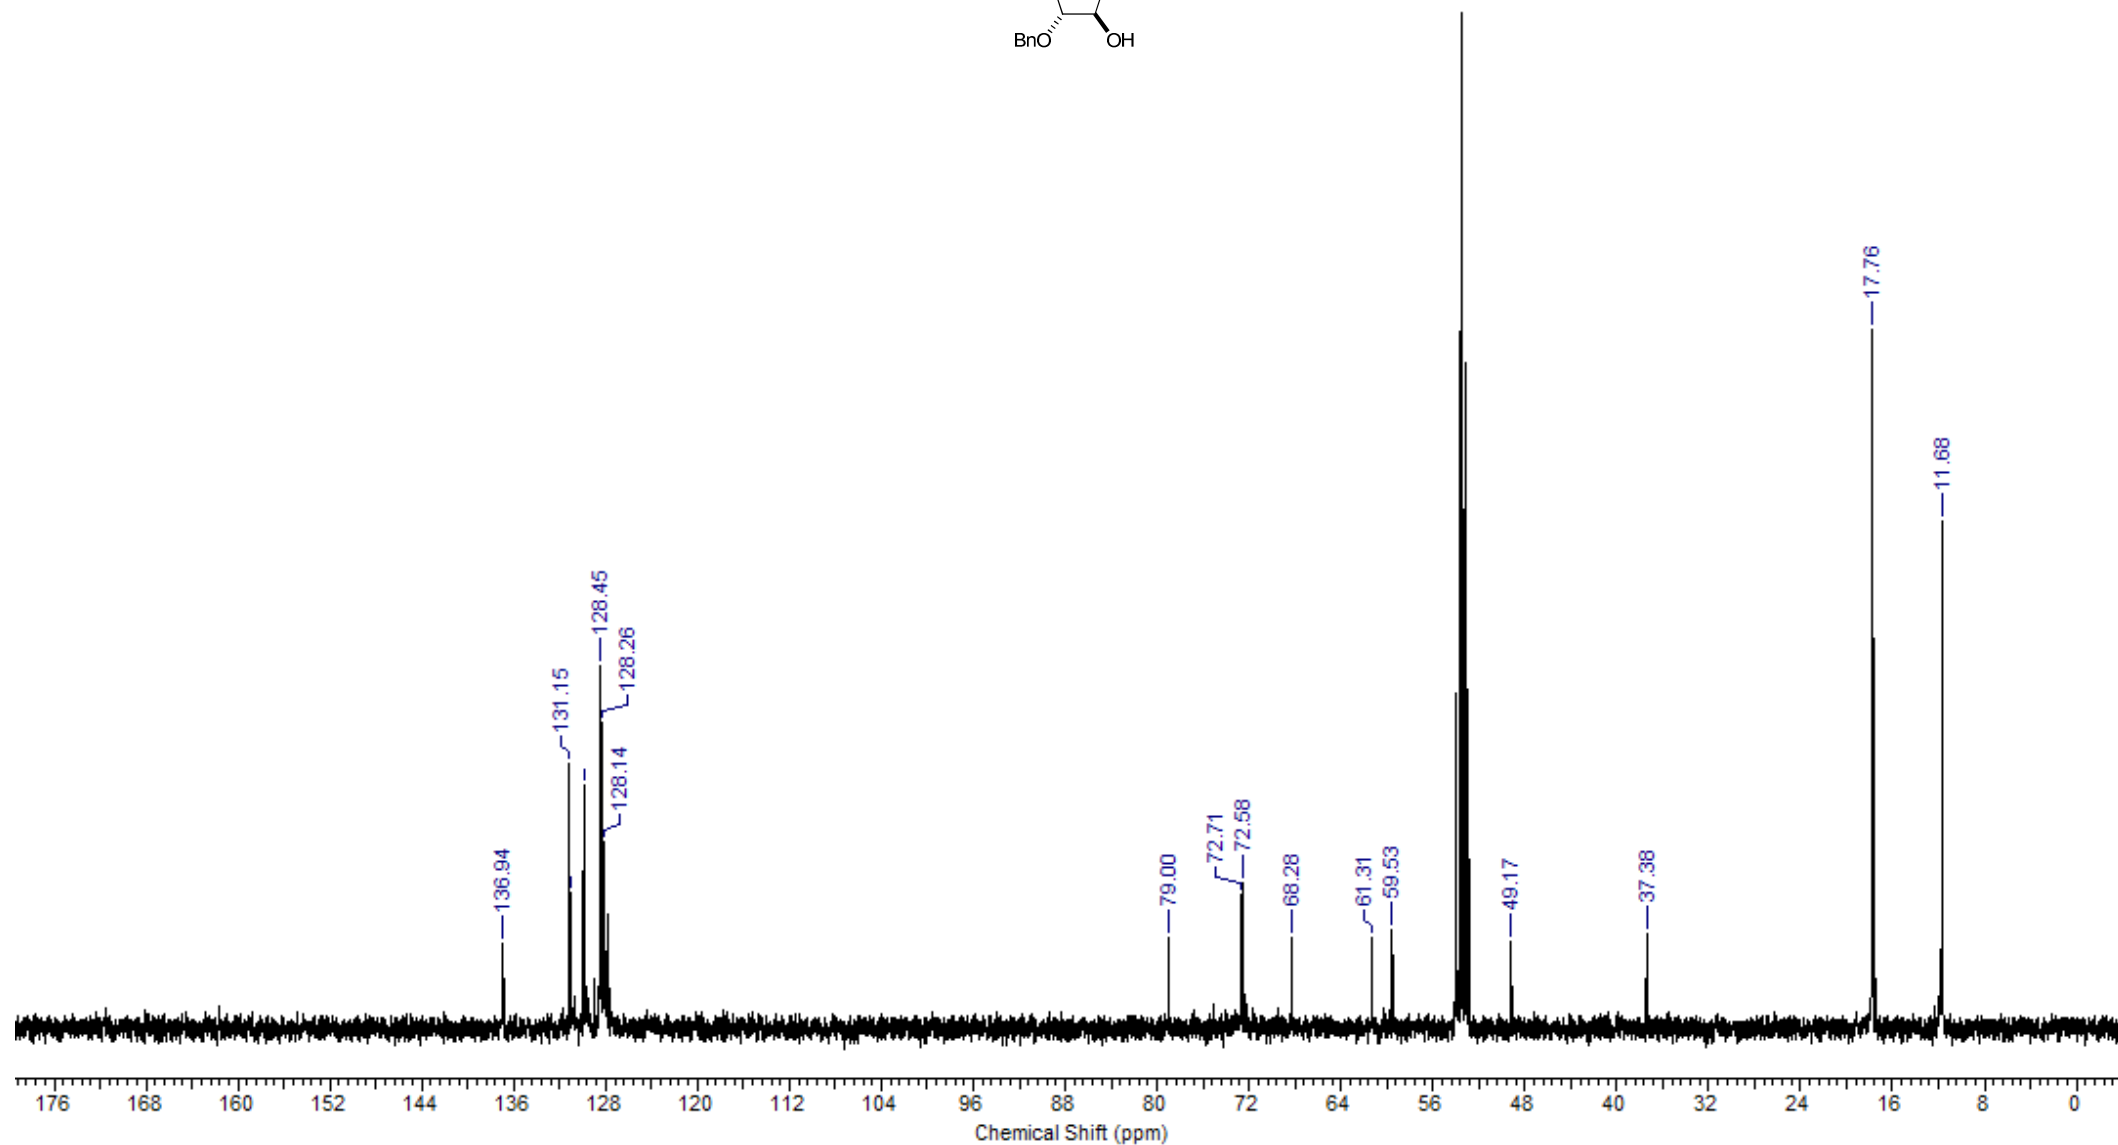

**(*R,R,R,R*)-*N*(1)-Benzyl-2-[(triisopropylsilyloxy)methyl]-3-benzyloxy-4,5-dihydroxy-4,5-*O*-carbonylpiperidine 16** (400 MHz  $^1\text{H}$ ,  $\text{CDCl}_3$ )

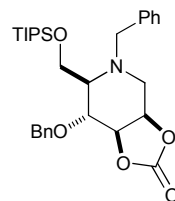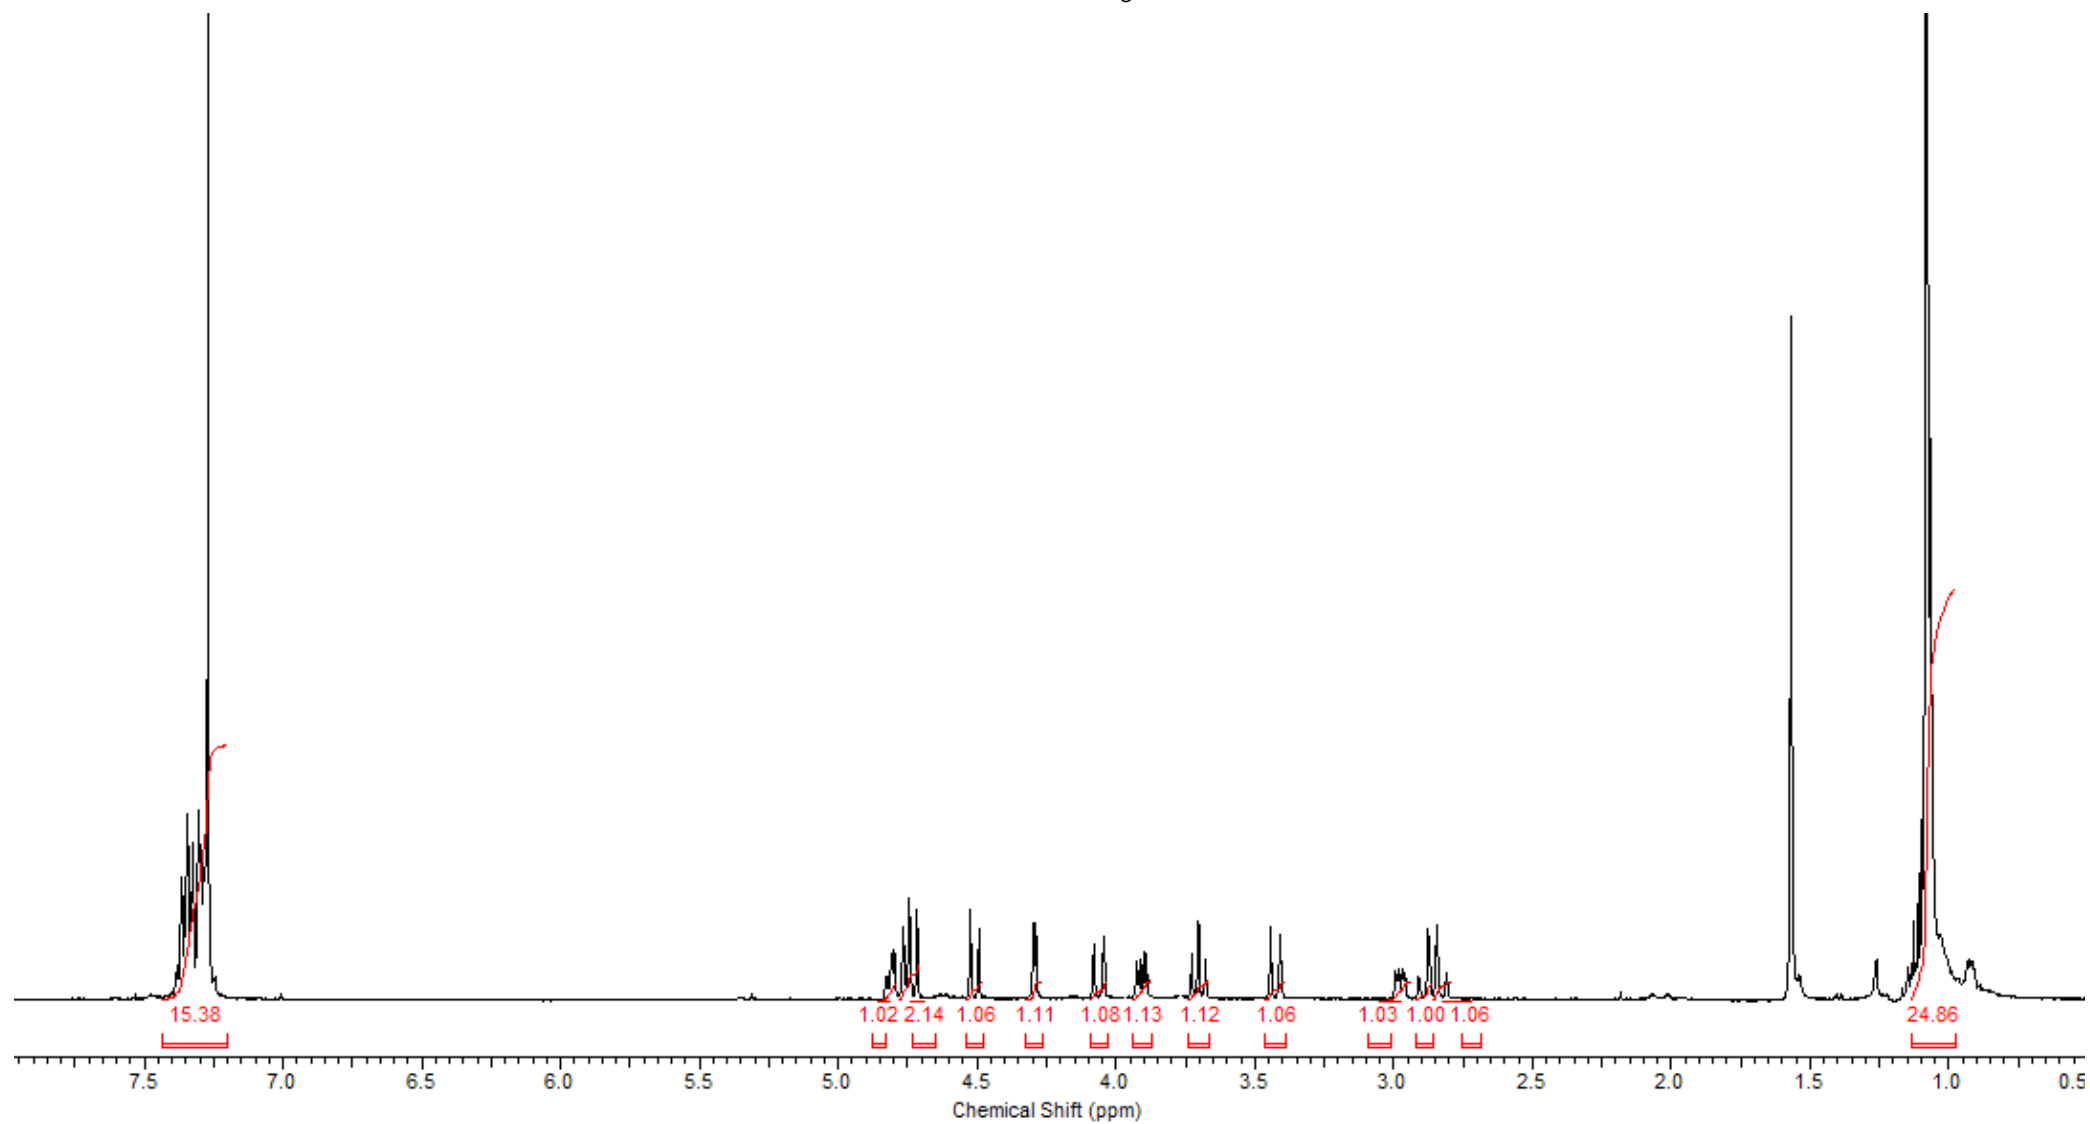

**(*R,R,R,R*)-*N*(1)-Benzyl-2-[(triisopropylsilyloxy)methyl]-3-benzyloxy-4,5-dihydroxy-4,5-*O*-carbonylpiperidine 16 (100 MHz  $^{13}\text{C}$ ,  $\text{CDCl}_3$ )**

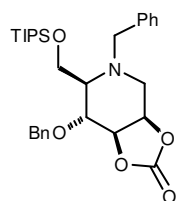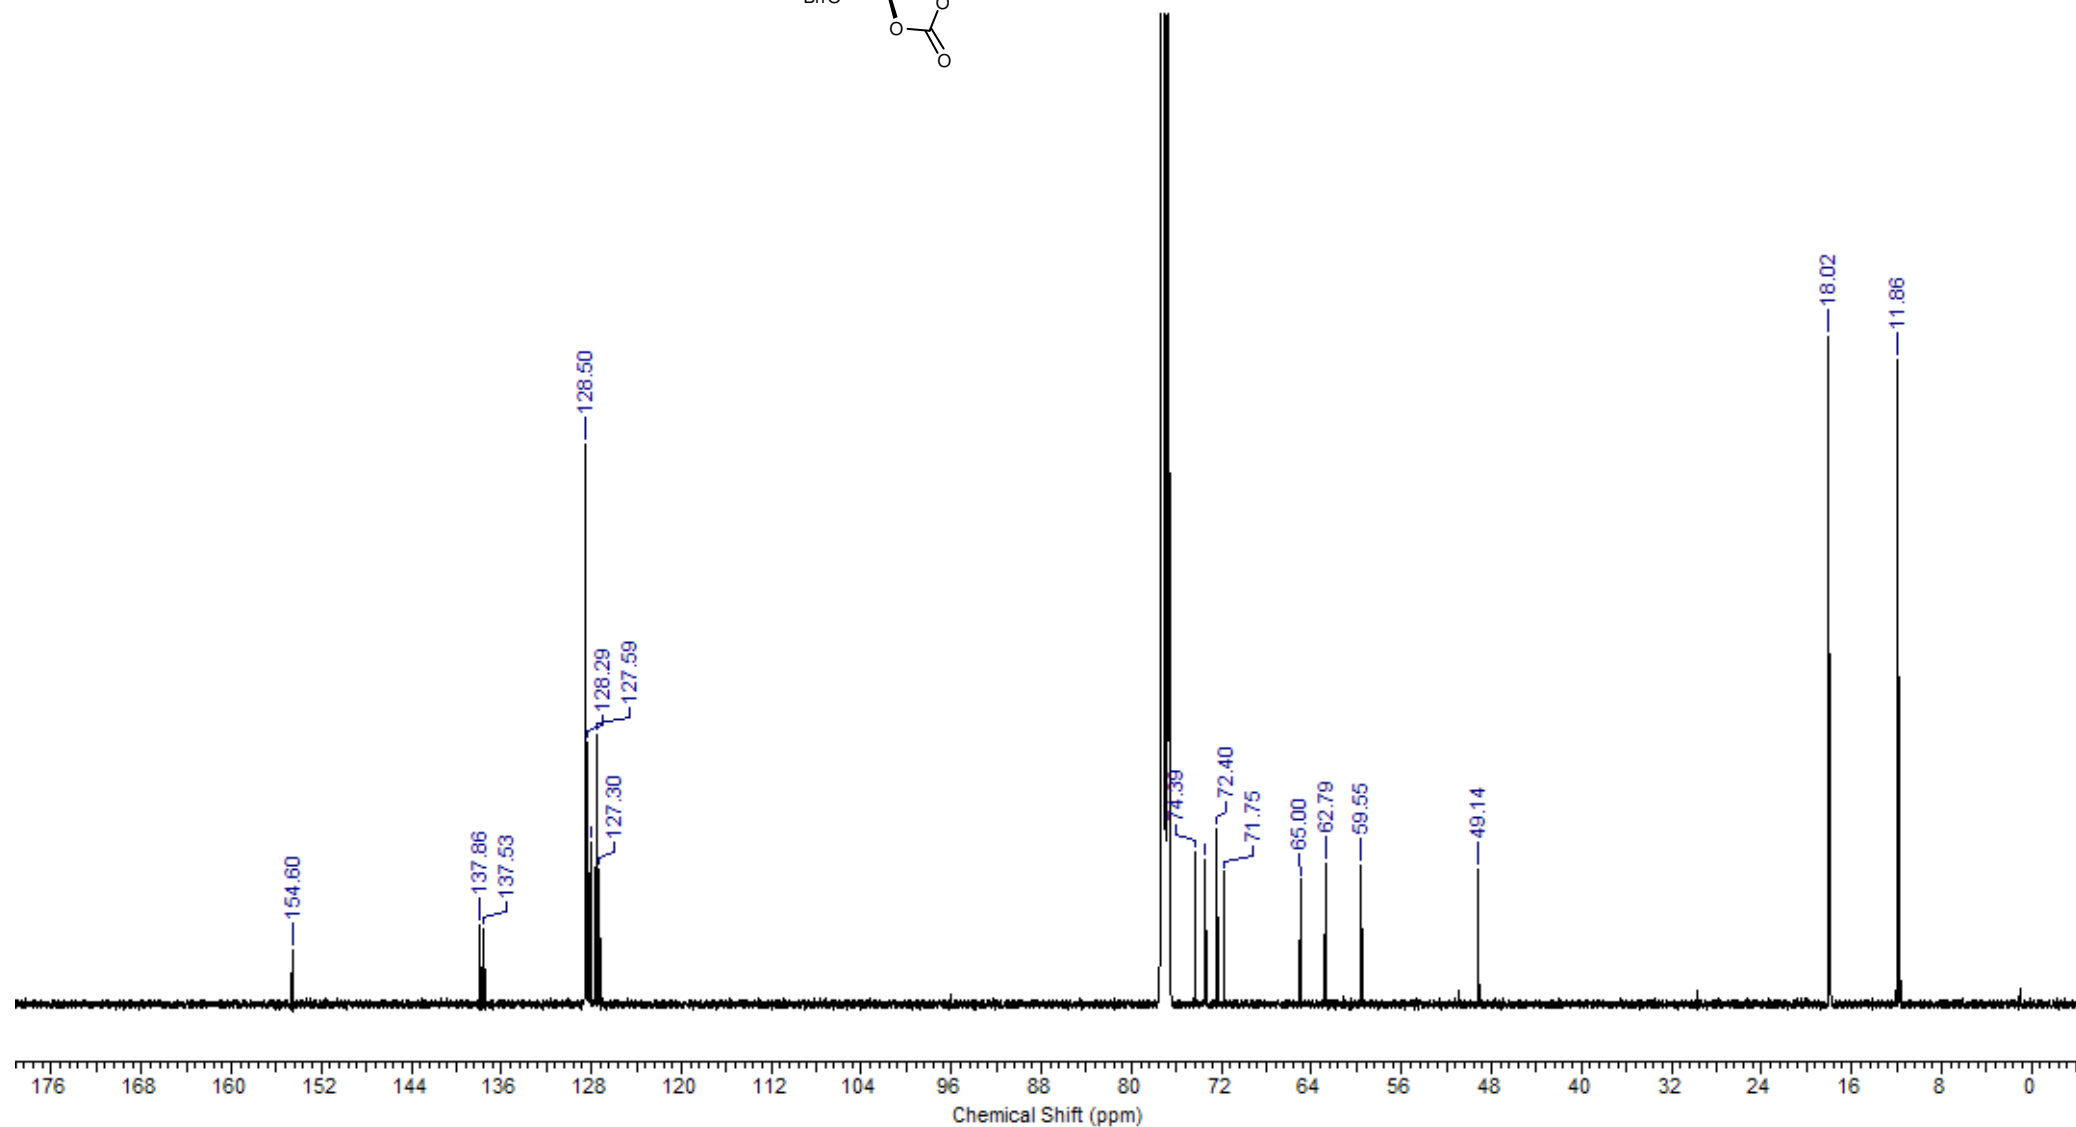

**(*R,R,R,R*)-*N*(1)-Benzyl-2-[(triisopropylsilyloxy)methyl]-3-benzyloxy-4,5-dihydropiperidine 17 (400 MHz  $^1\text{H}$ ,  $\text{CDCl}_3$ )**

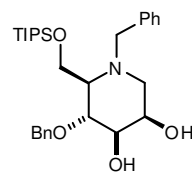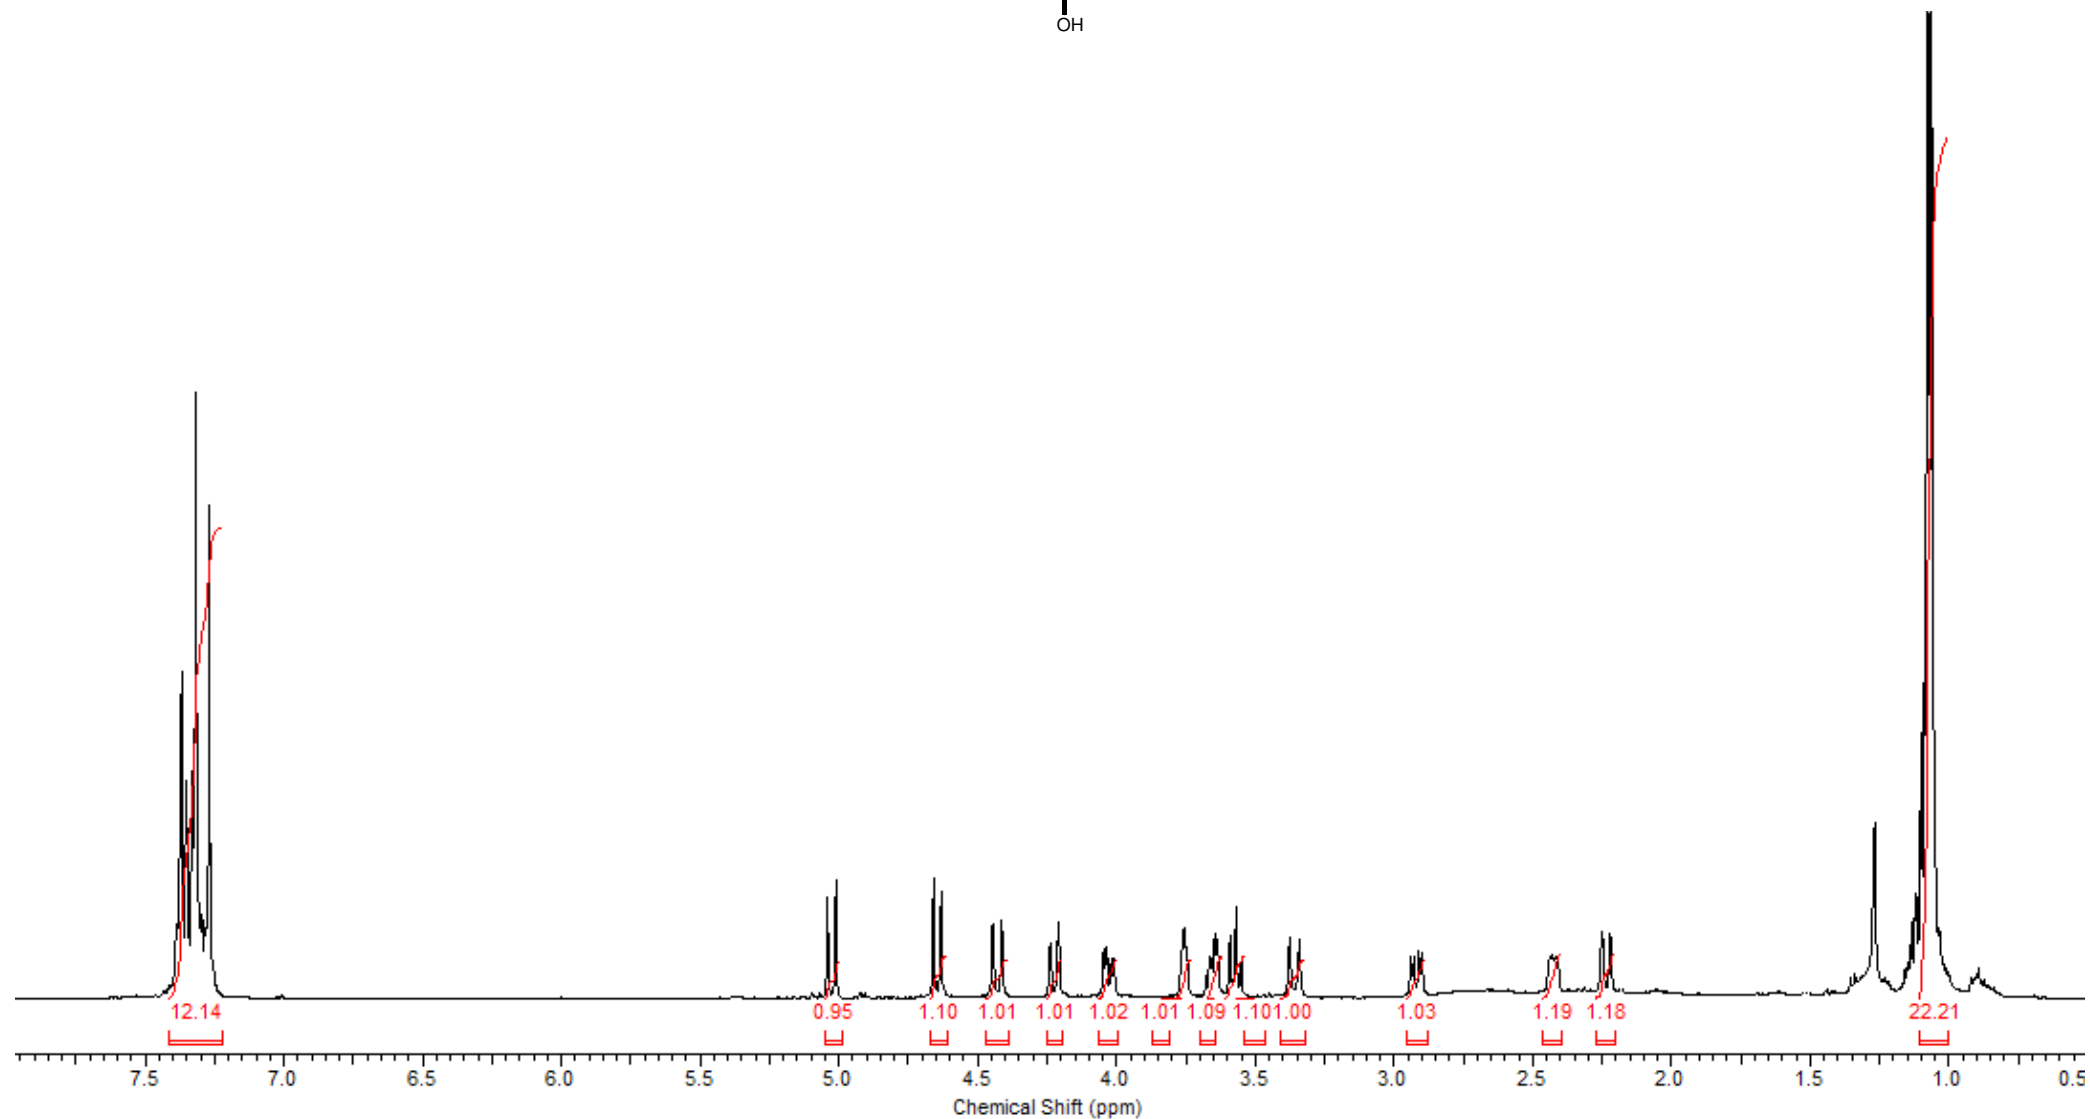

**(*R,R,R,R*)-*N*(1)-Benzyl-2-[(triisopropylsilyloxy)methyl]-3-benzyloxy-4,5-dihydropiperidine 17 (100 MHz  $^{13}\text{C}$ ,  $\text{CDCl}_3$ )**

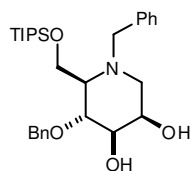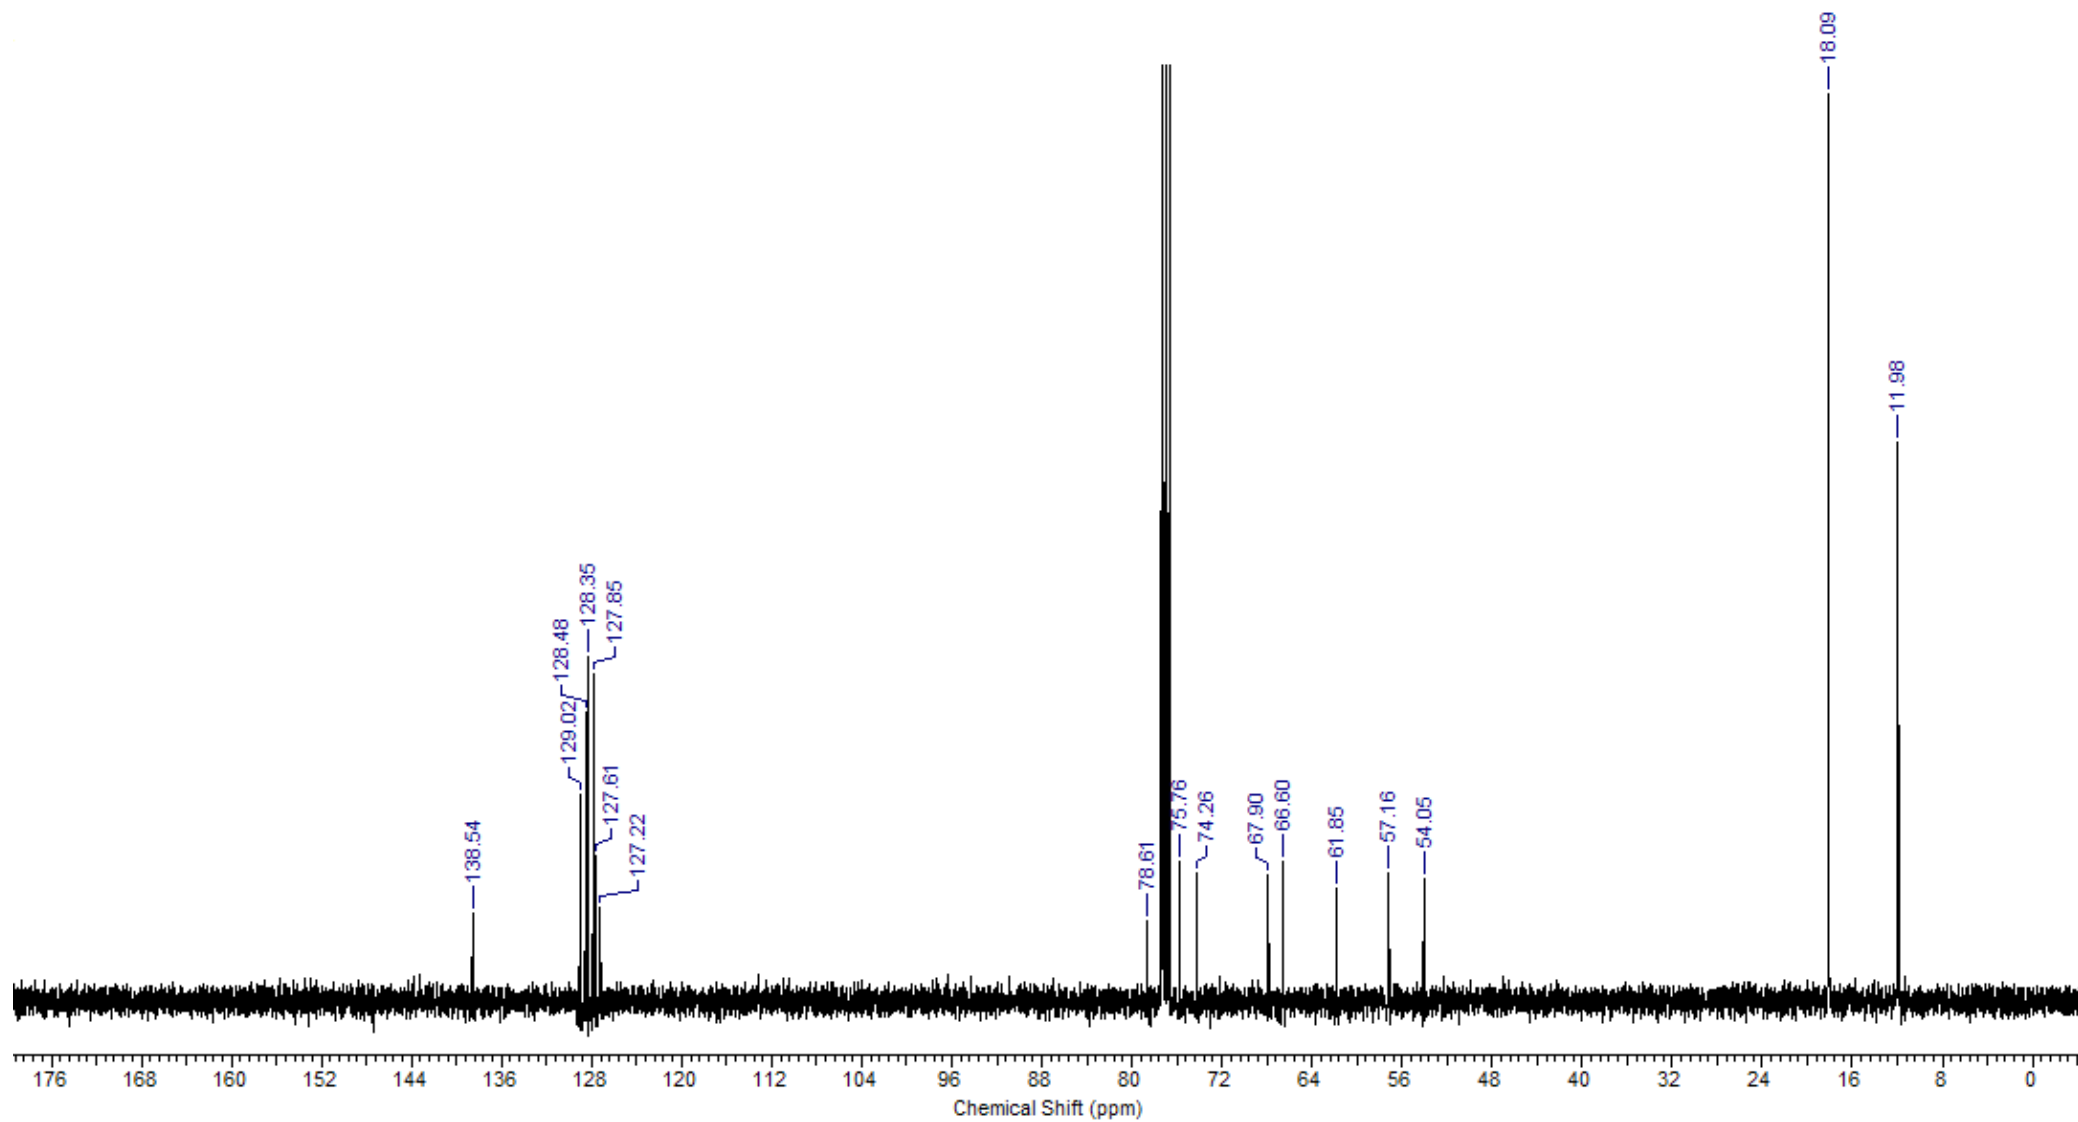

**(*R,R,R,R*)-*N*(1)-Benzyl-2-[(triisopropylsilyloxy)methyl]-3-benzyloxy-4,5-diacetoxypiperidine 18 (400 MHz  $^1\text{H}$ ,  $\text{CDCl}_3$ )**

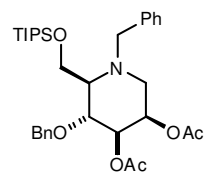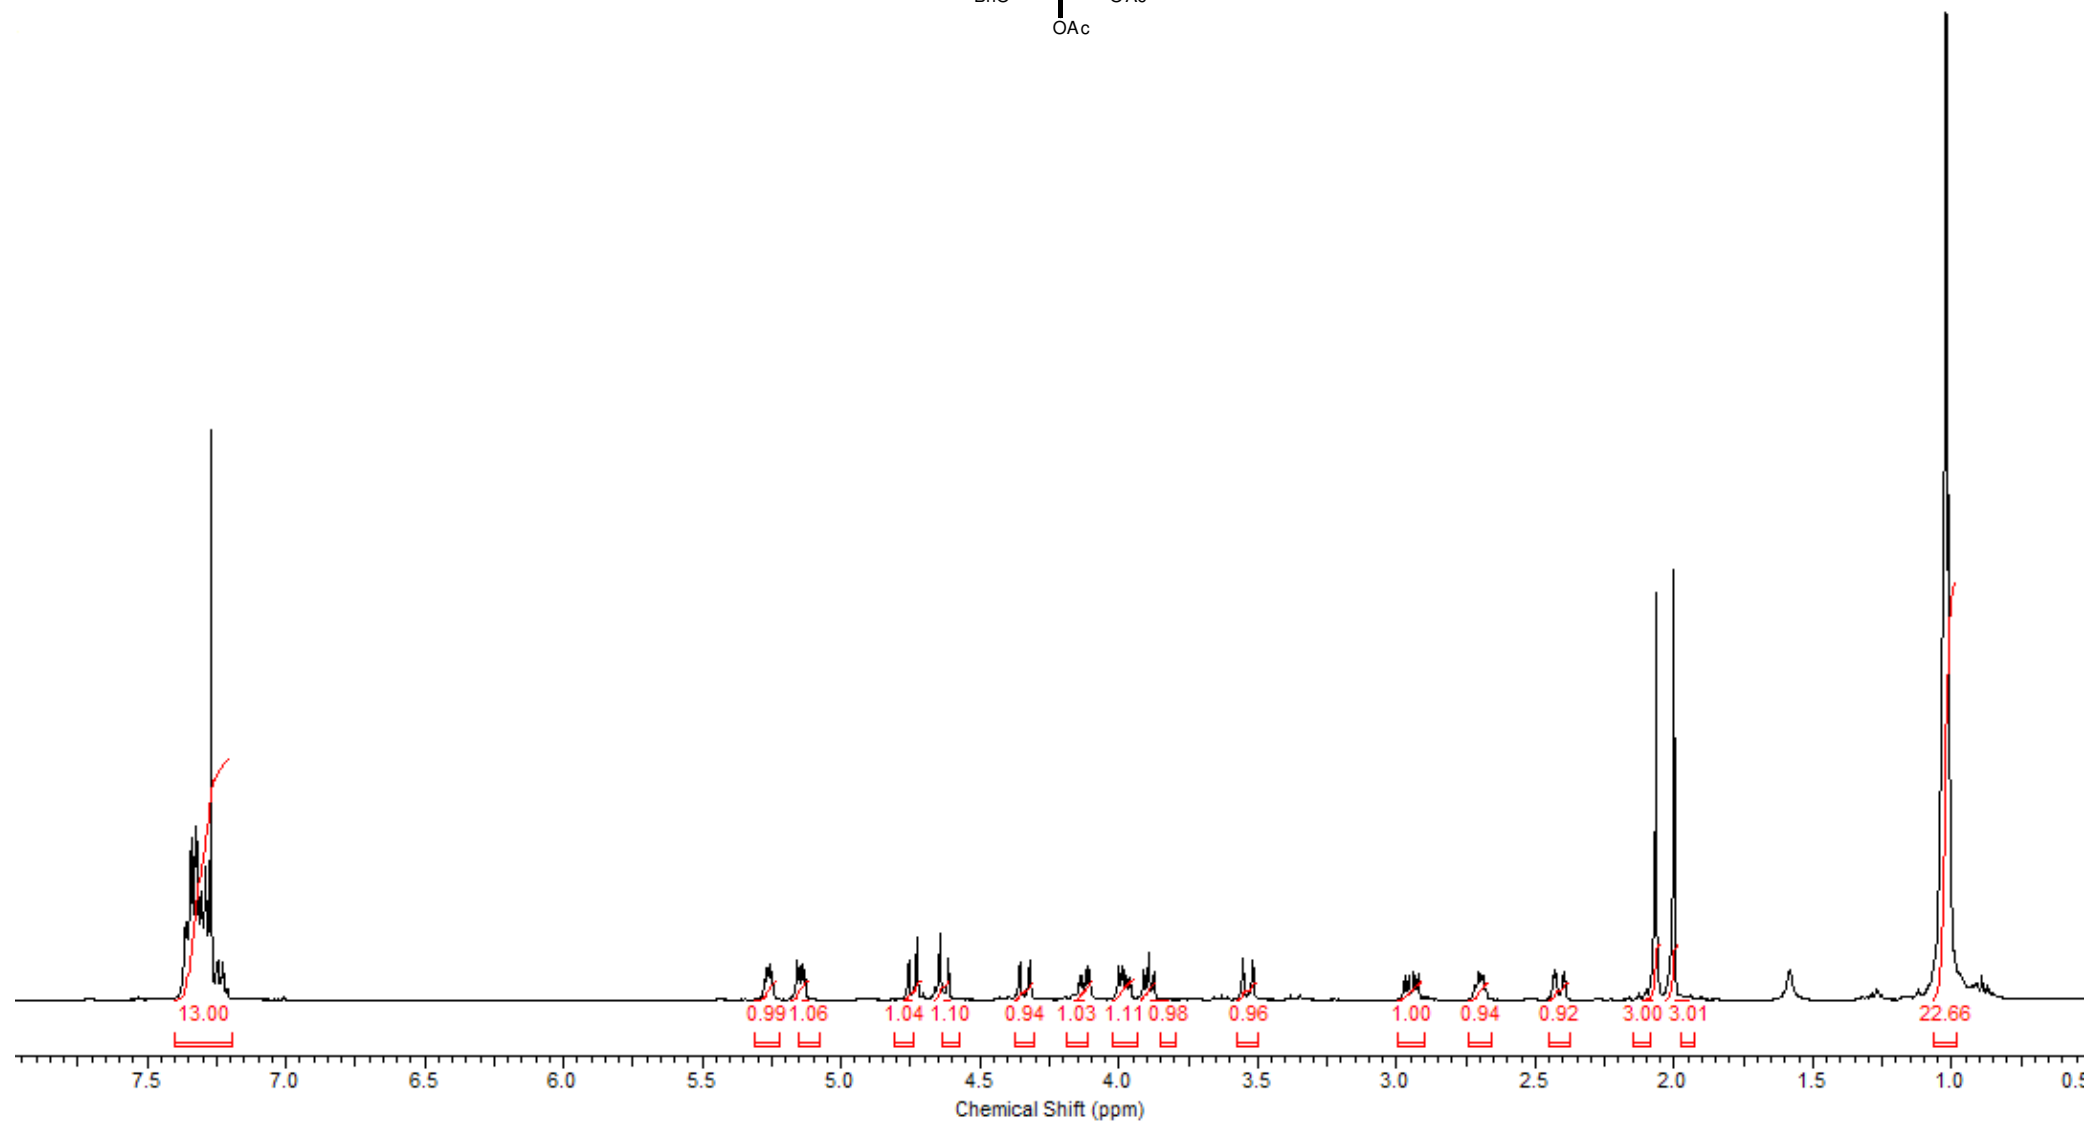

**(*R,R,R,R*)-*N*(1)-Benzyl-2-[(triisopropylsilyloxy)methyl]-3-benzyloxy-4,5-diacetoxypiperidine 18** (100 MHz <sup>13</sup>C, CDCl<sub>3</sub>)

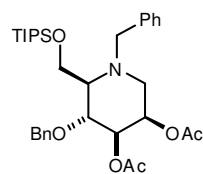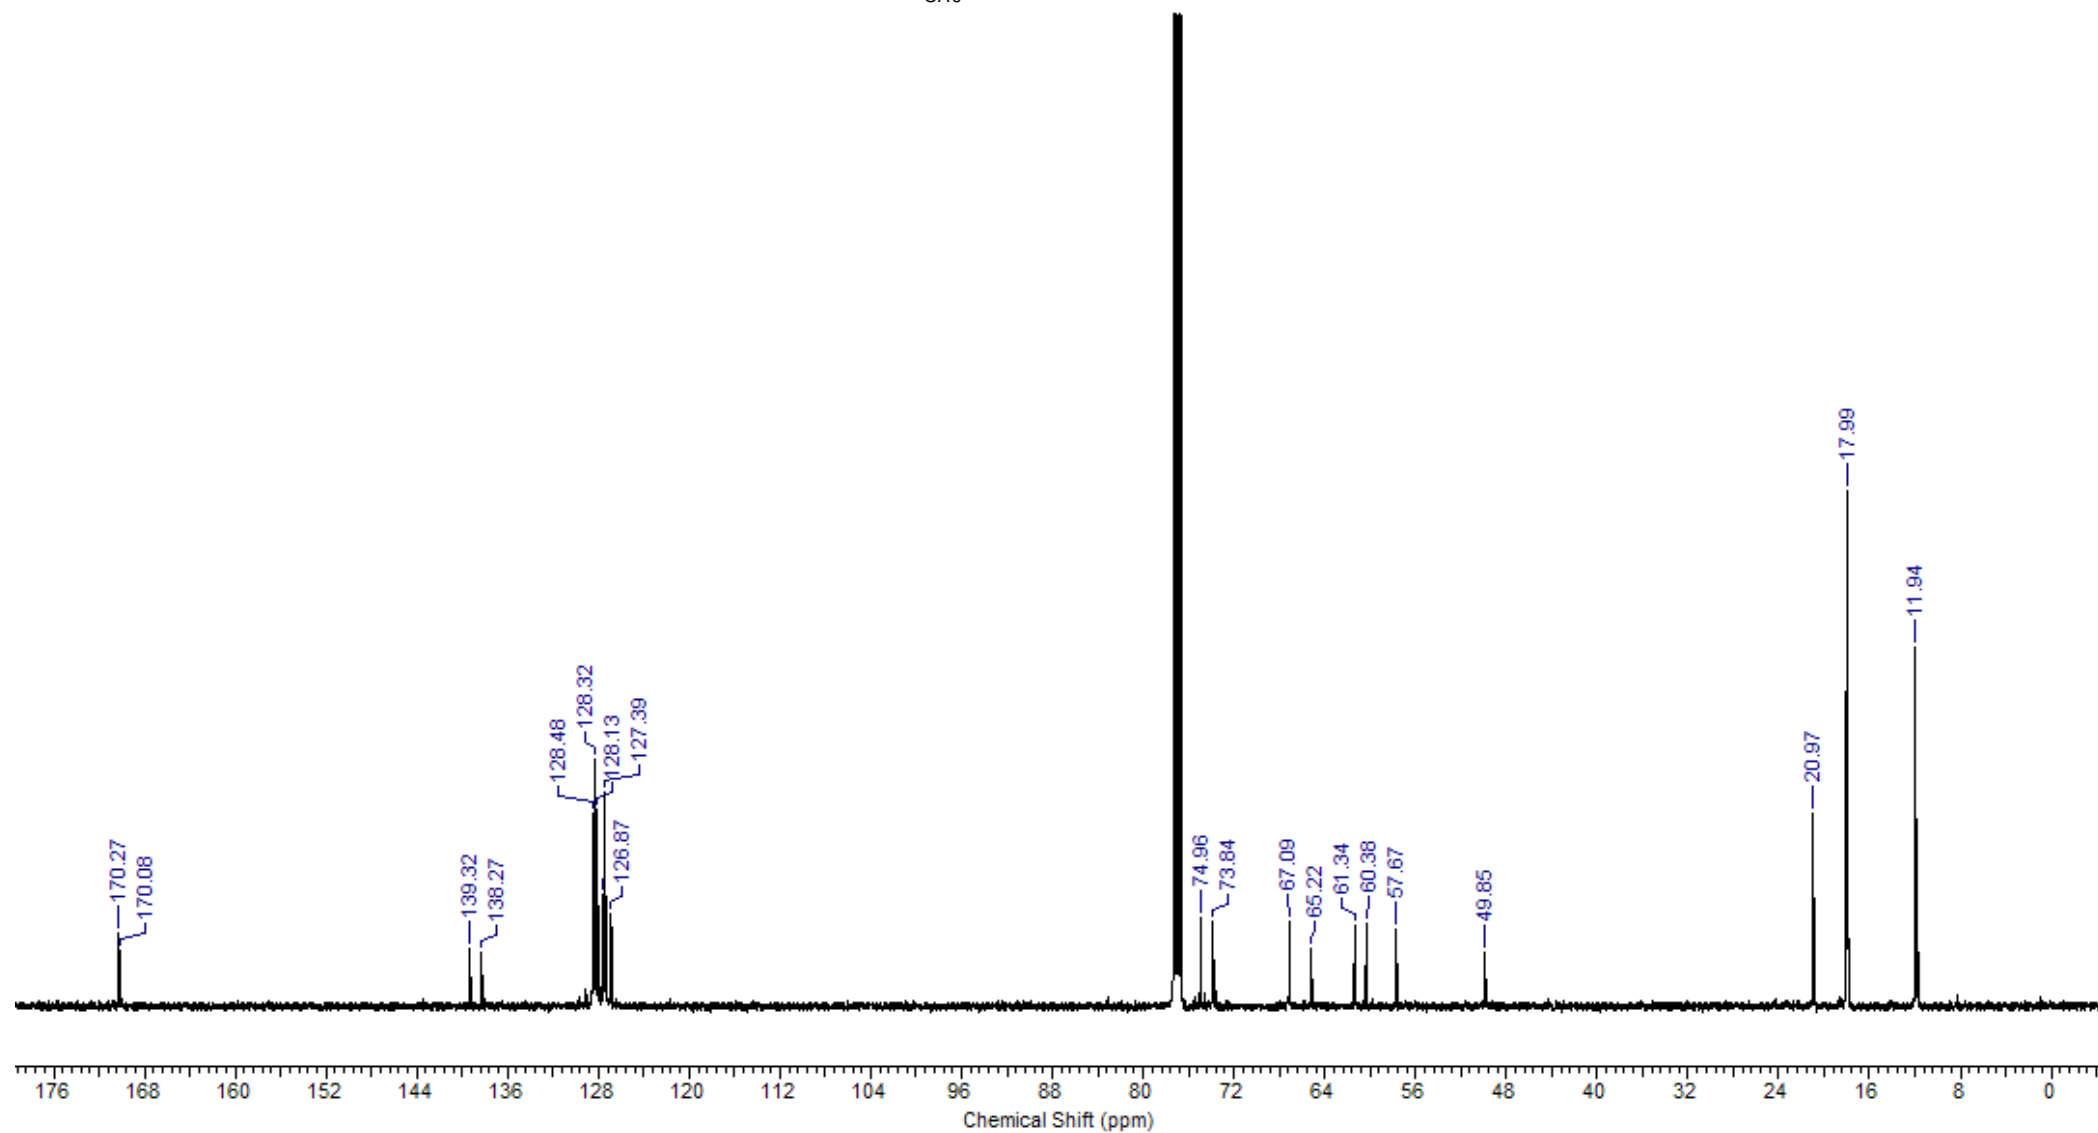

**(*R,R,R,R*)-*N*(1)-Benzyl-2-(hydroxymethyl)-3-benzyloxy-4,5-dihydropiperidine 19 (400 MHz  $^1\text{H}$ ,  $\text{CDCl}_3$ )**

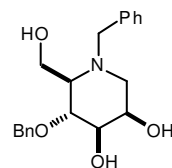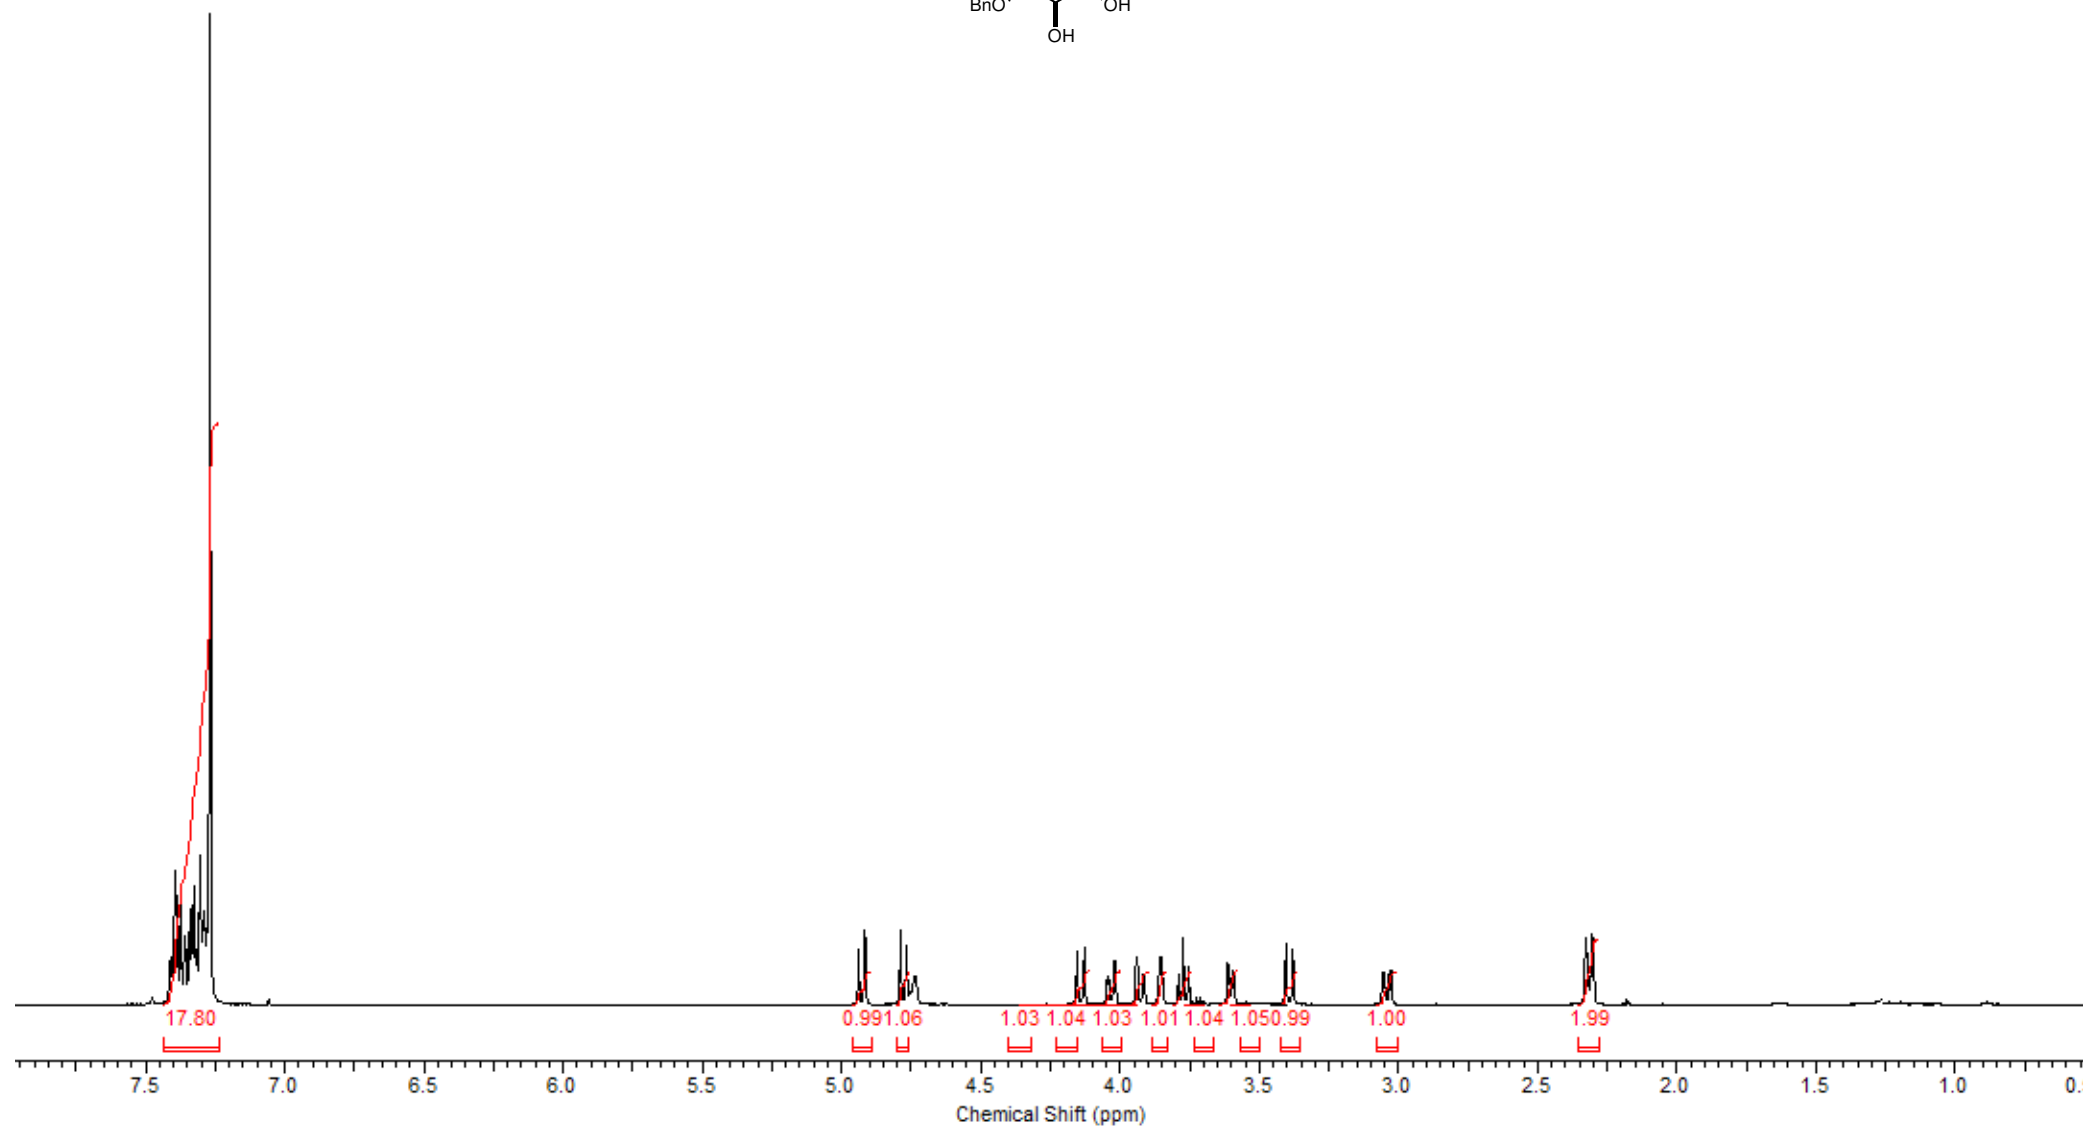

**(*R,R,R,R*)-*N*(1)-Benzyl-2-(hydroxymethyl)-3-benzyloxy-4,5-dihydropiperidine 19** (100 MHz  $^{13}\text{C}$ ,  $\text{CDCl}_3$ )

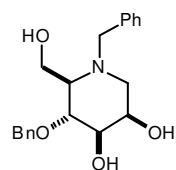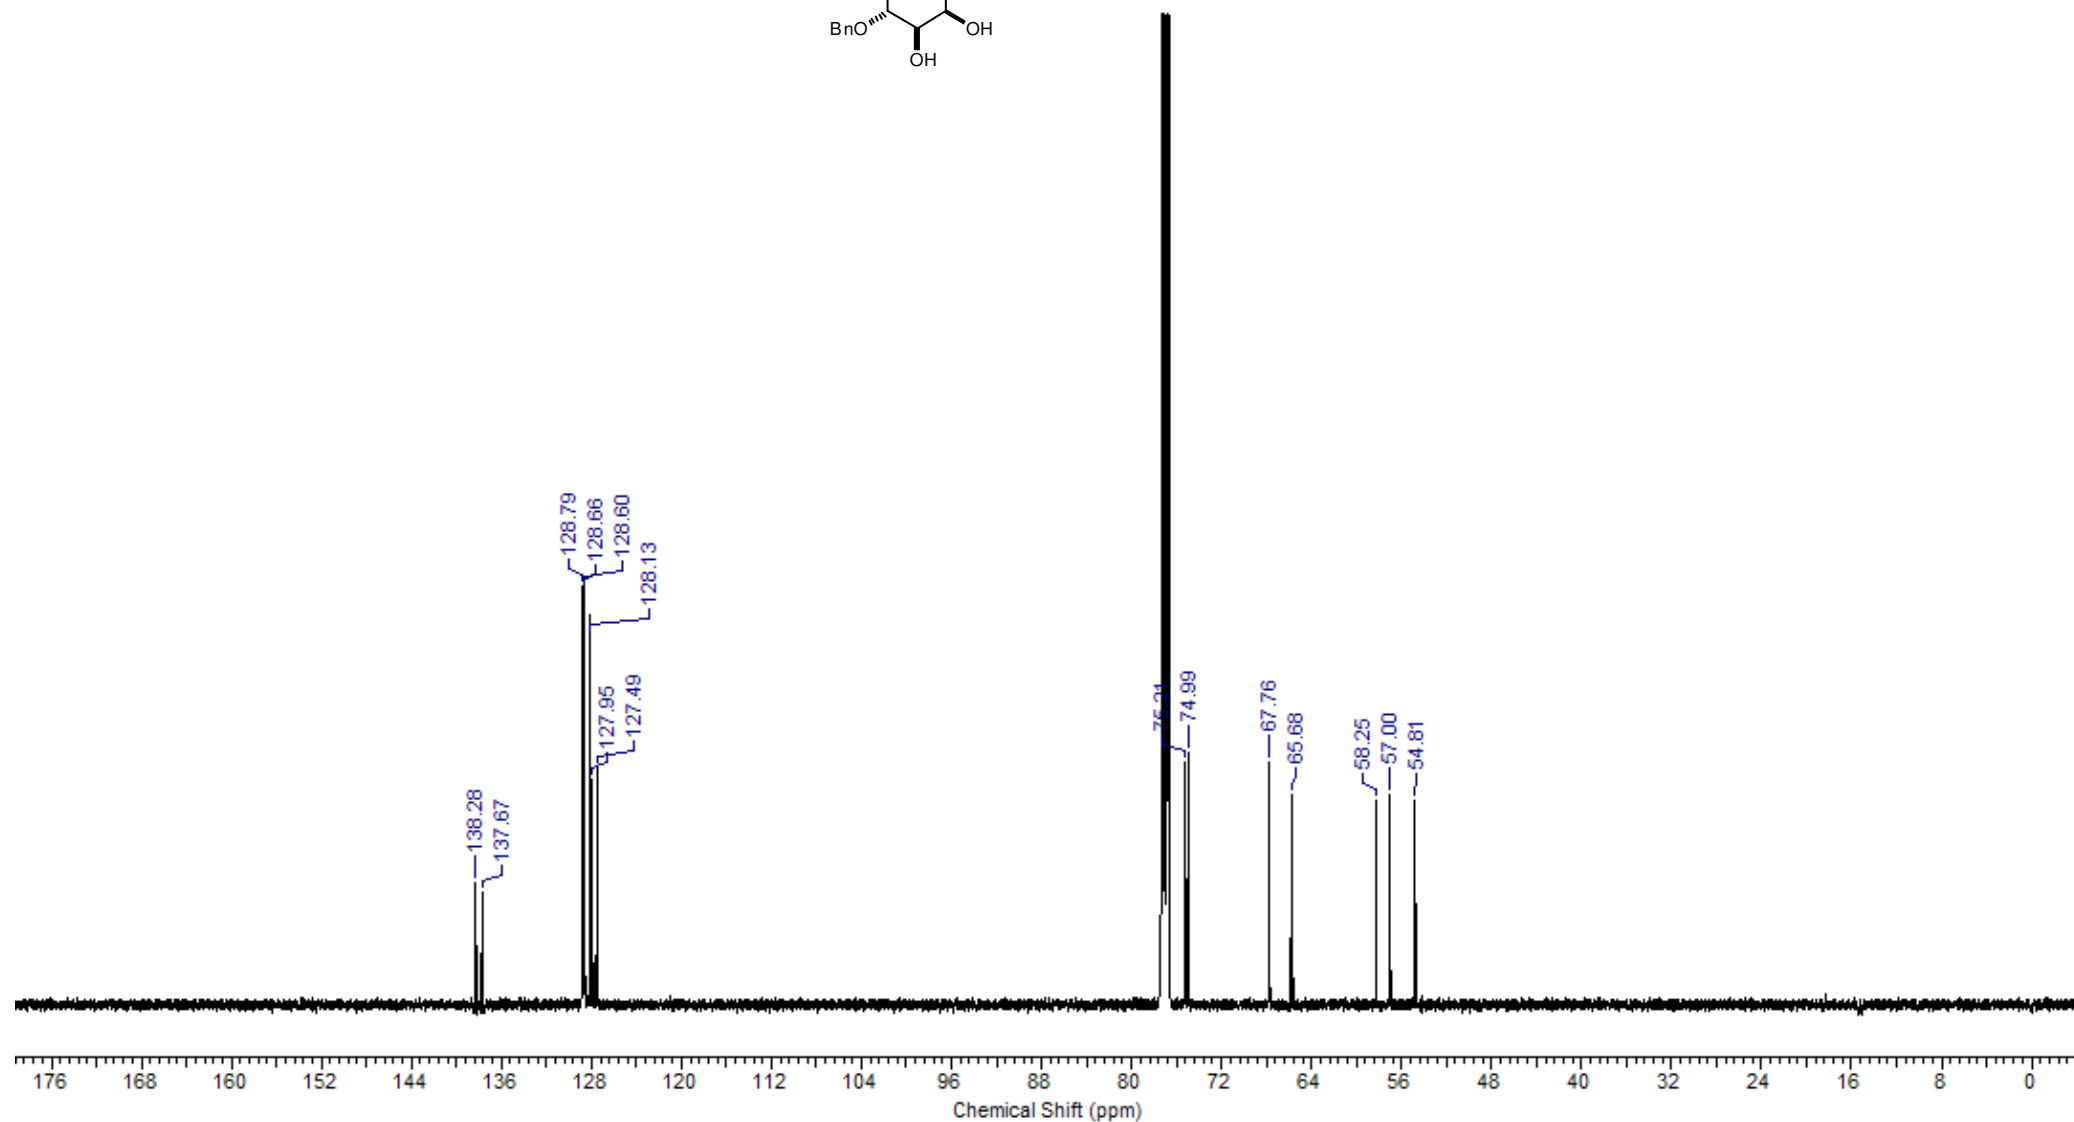

**(*R,R,R,R*)-1,5-Dideoxy-1,5-imino-D-mannose [(-)-1-deoxymannojirimycin] 21 (400 MHz  $^1\text{H}$ ,  $\text{D}_2\text{O}$ )**

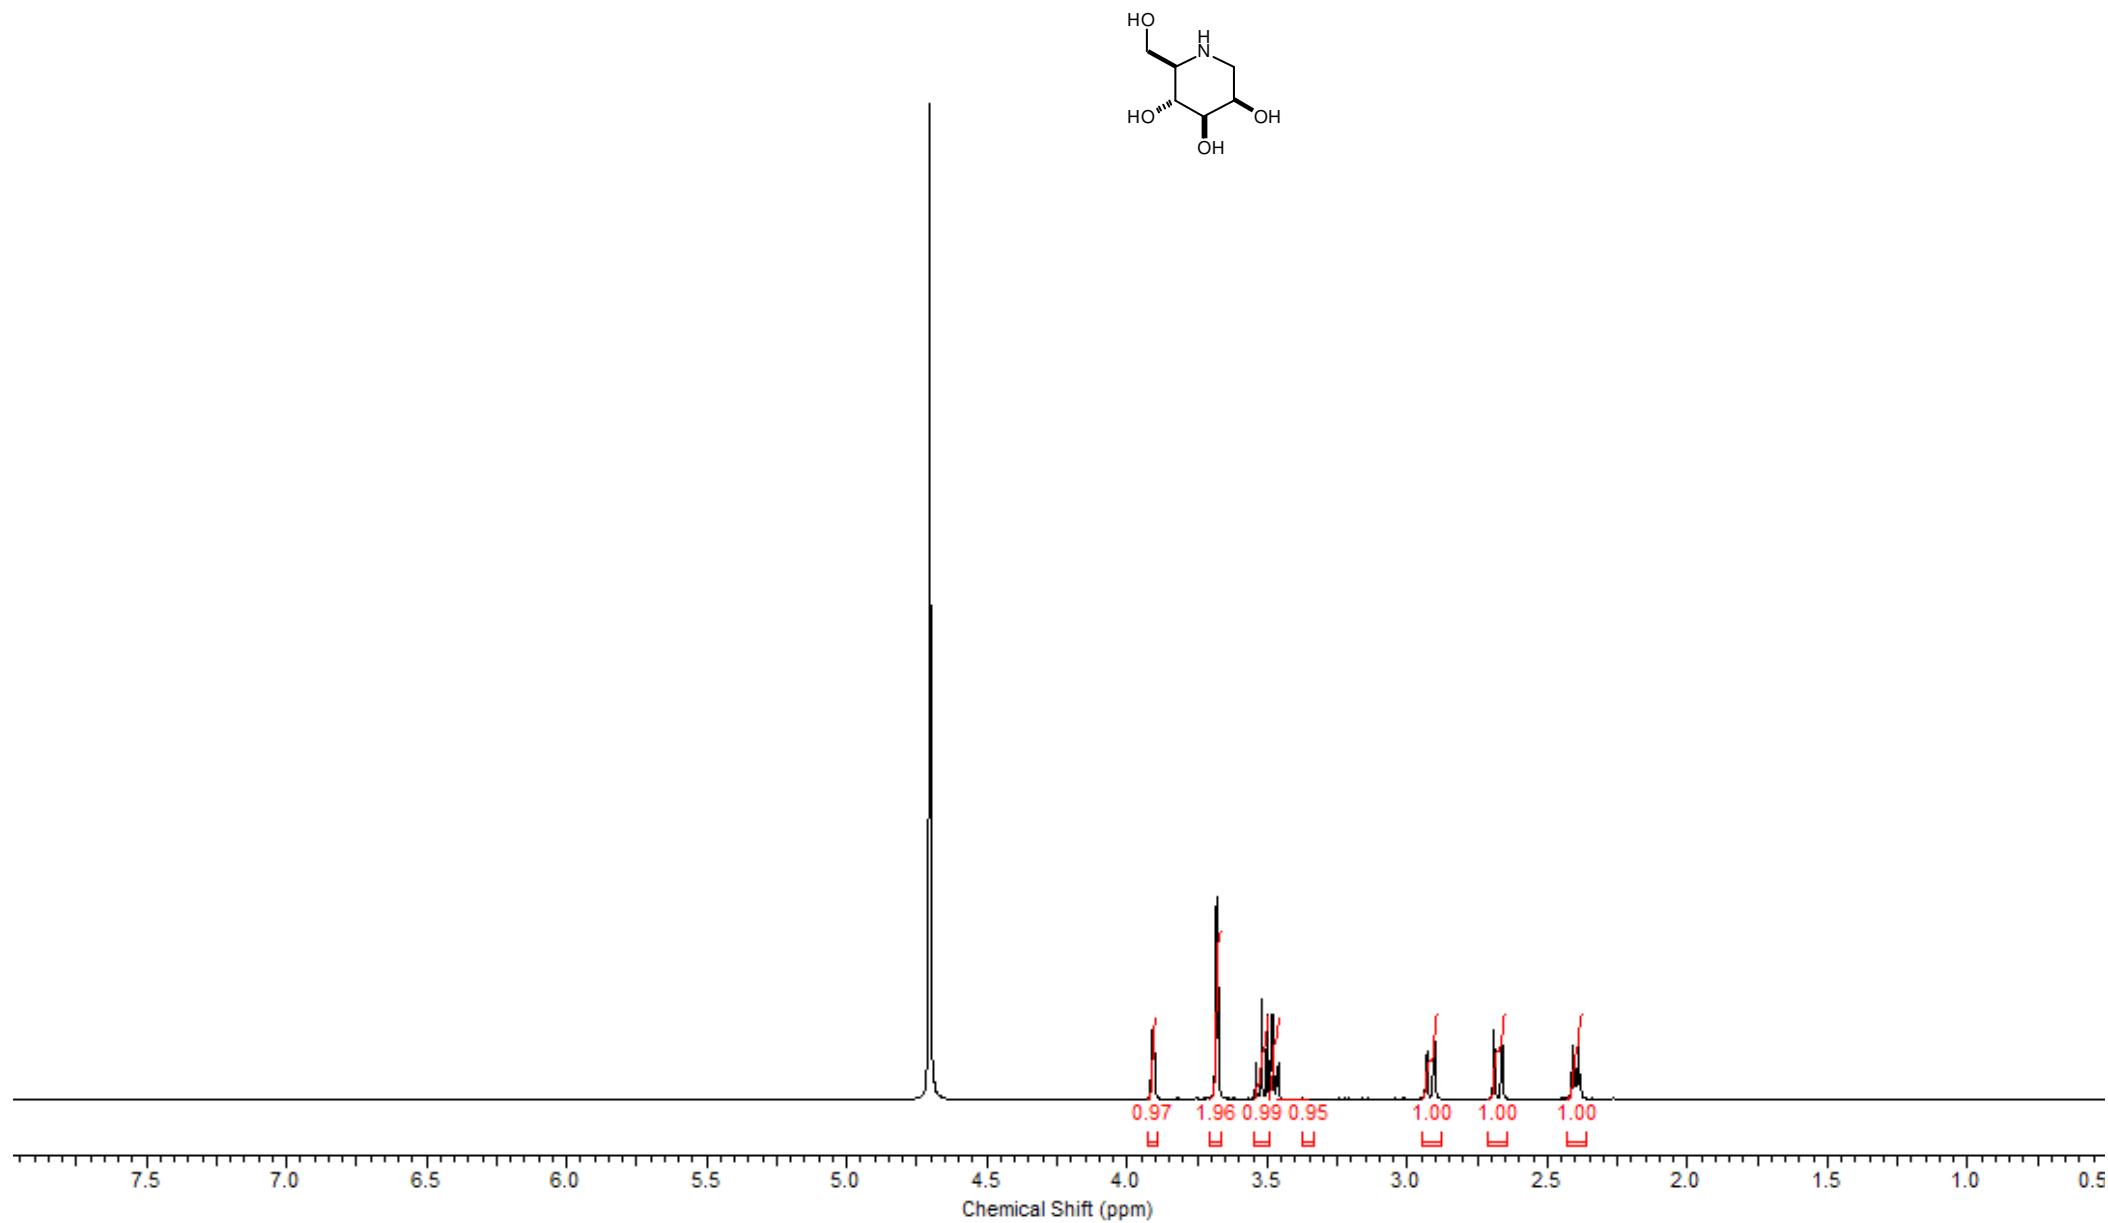

(*R,R,R,R*)-1,5-Dideoxy-1,5-imino-D-mannose [(–)-1-deoxymannojirimycin] 21 (100 MHz <sup>13</sup>C, D<sub>2</sub>O)

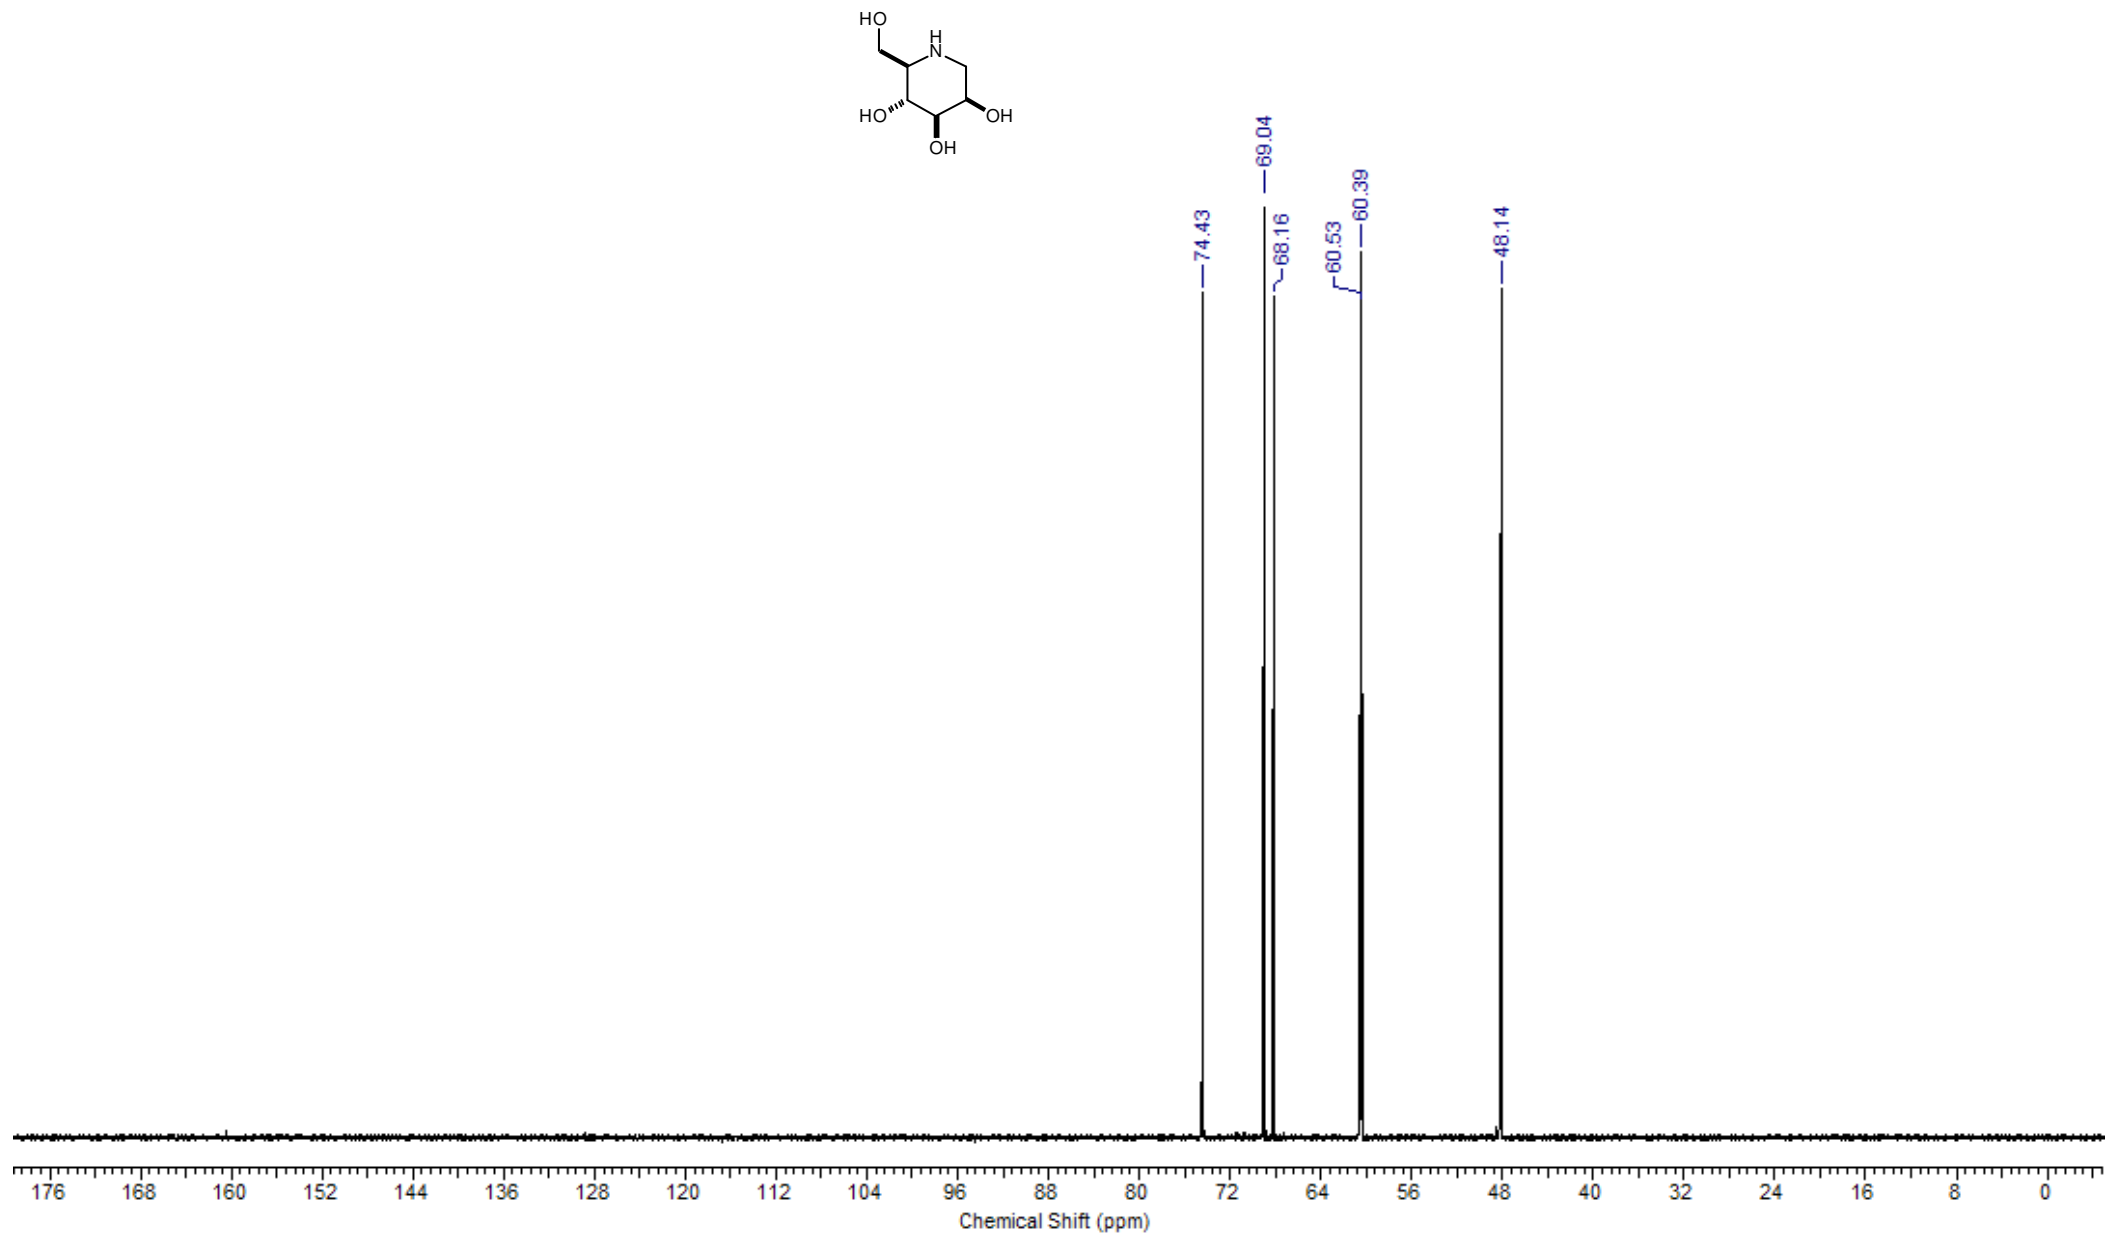

**(2*R*,3*R*,4*S*,5*S*)-*N*(1)-Benzyl-2-[(triisopropylsilyloxy)methyl]-3-benzyloxy-4,5-dihydropiperidine 22 (400 MHz  $^1\text{H}$ ,  $\text{CDCl}_3$ )**

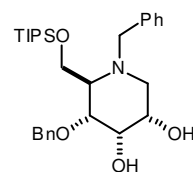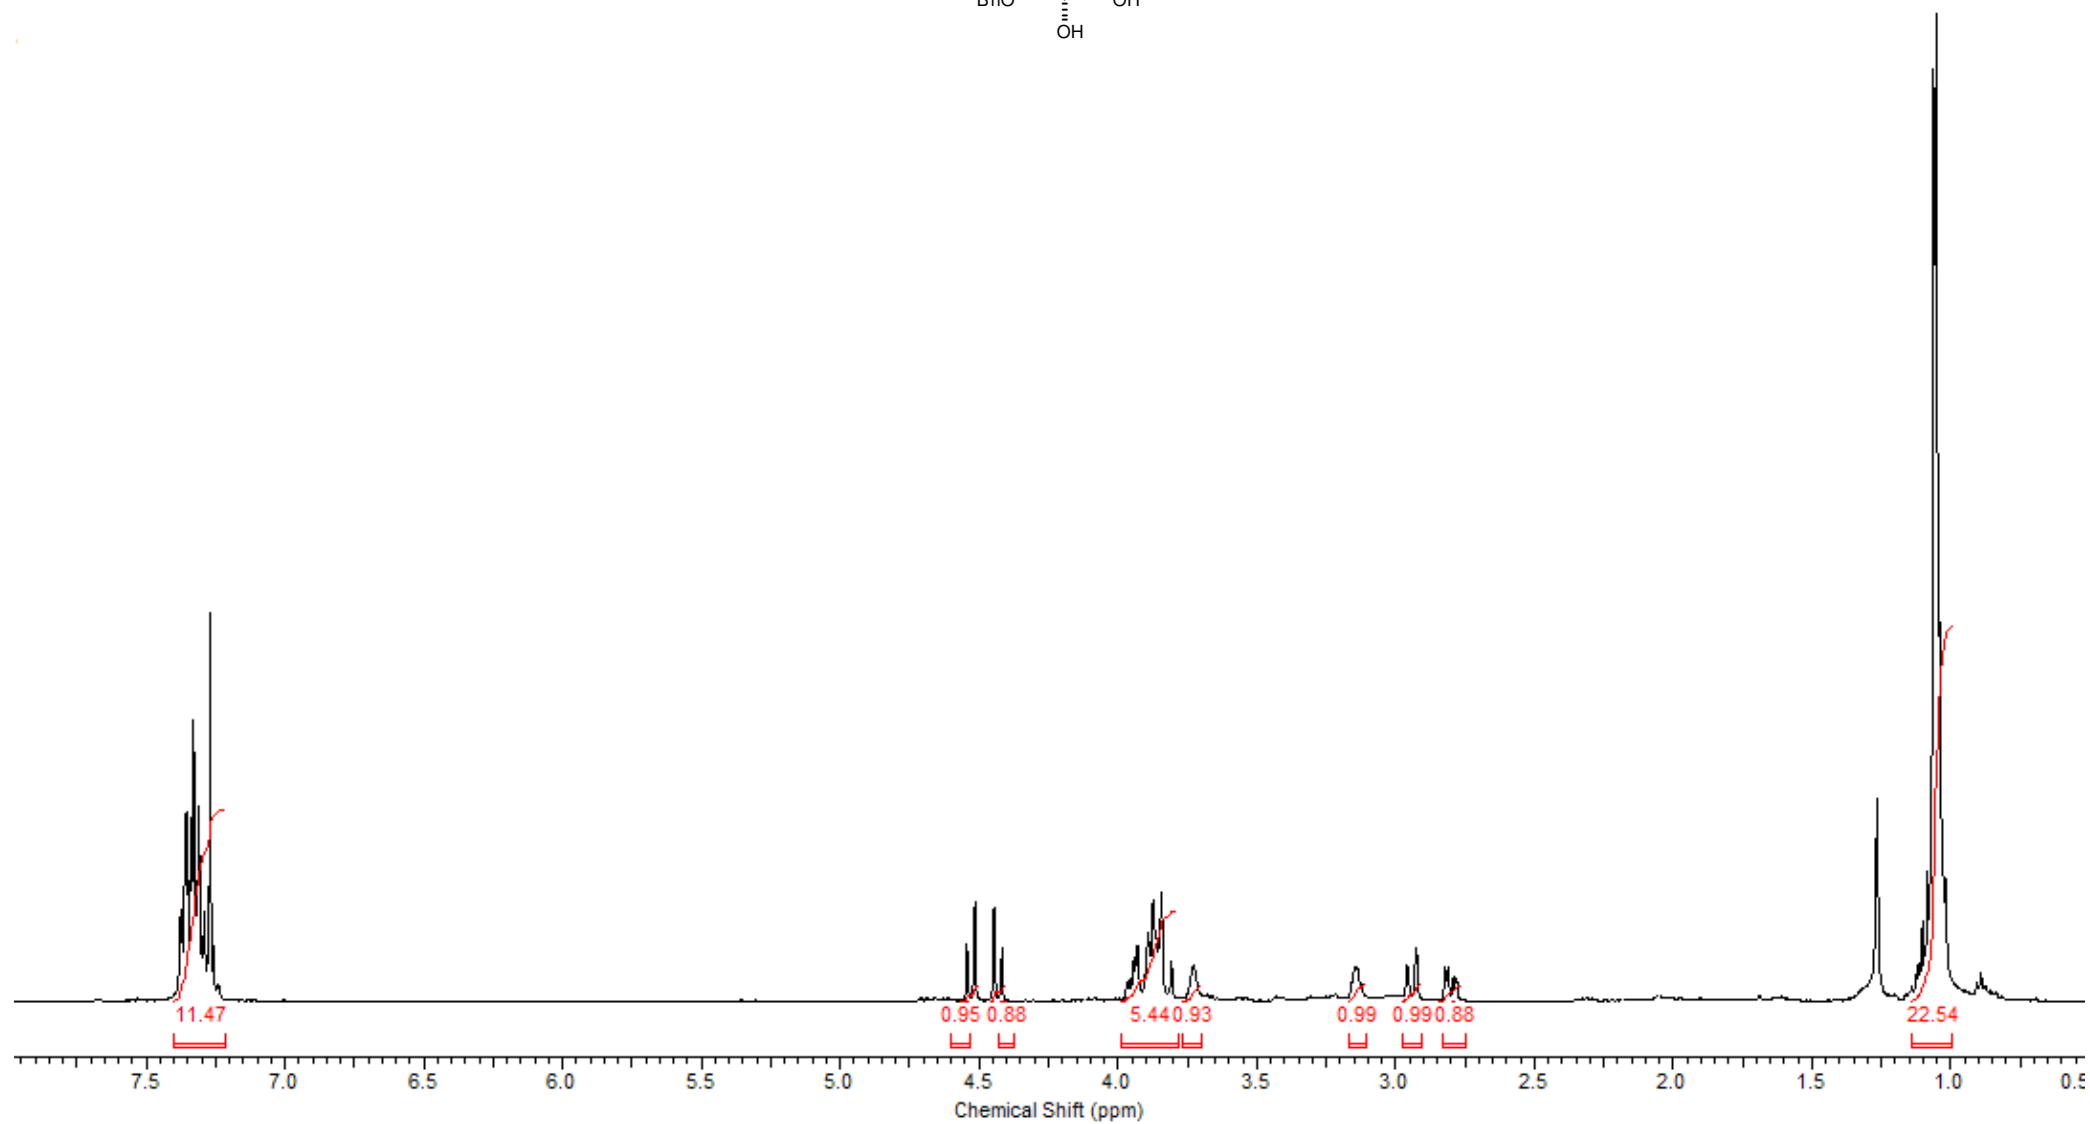

**(2*R*,3*R*,4*S*,5*S*)-*N*(1)-Benzyl-2-[(triisopropylsilyloxy)methyl]-3-benzyloxy-4,5-dihydropiperidine 22** (100 MHz  $^{13}\text{C}$ ,  $\text{CDCl}_3$ )

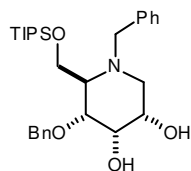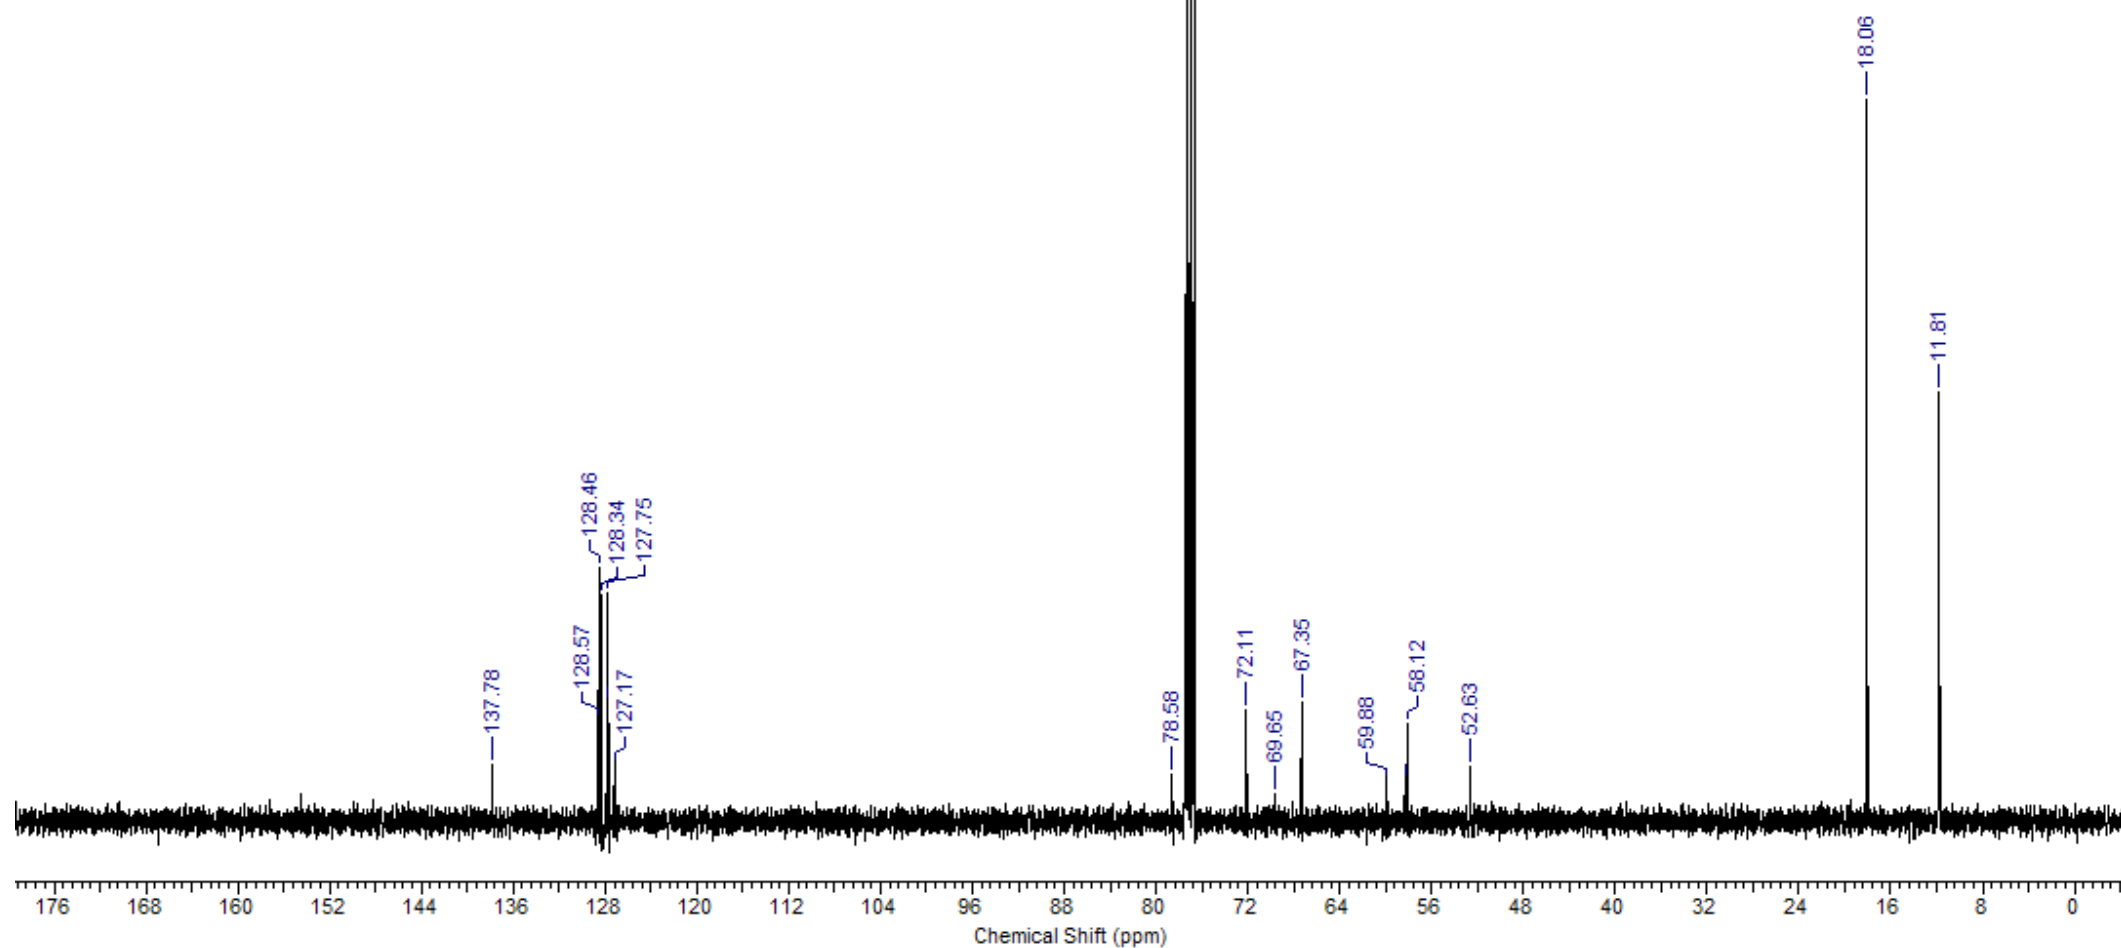

**(2*R*,3*R*,4*S*,5*S*)-*N*(1)-Benzyl-2-[(triisopropylsilyloxy)methyl]-3-benzyloxy-4,5-diacetoxypiperidine 24** (400 MHz  $^1\text{H}$ ,  $\text{CDCl}_3$ )

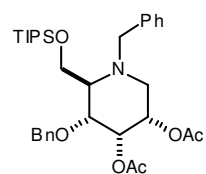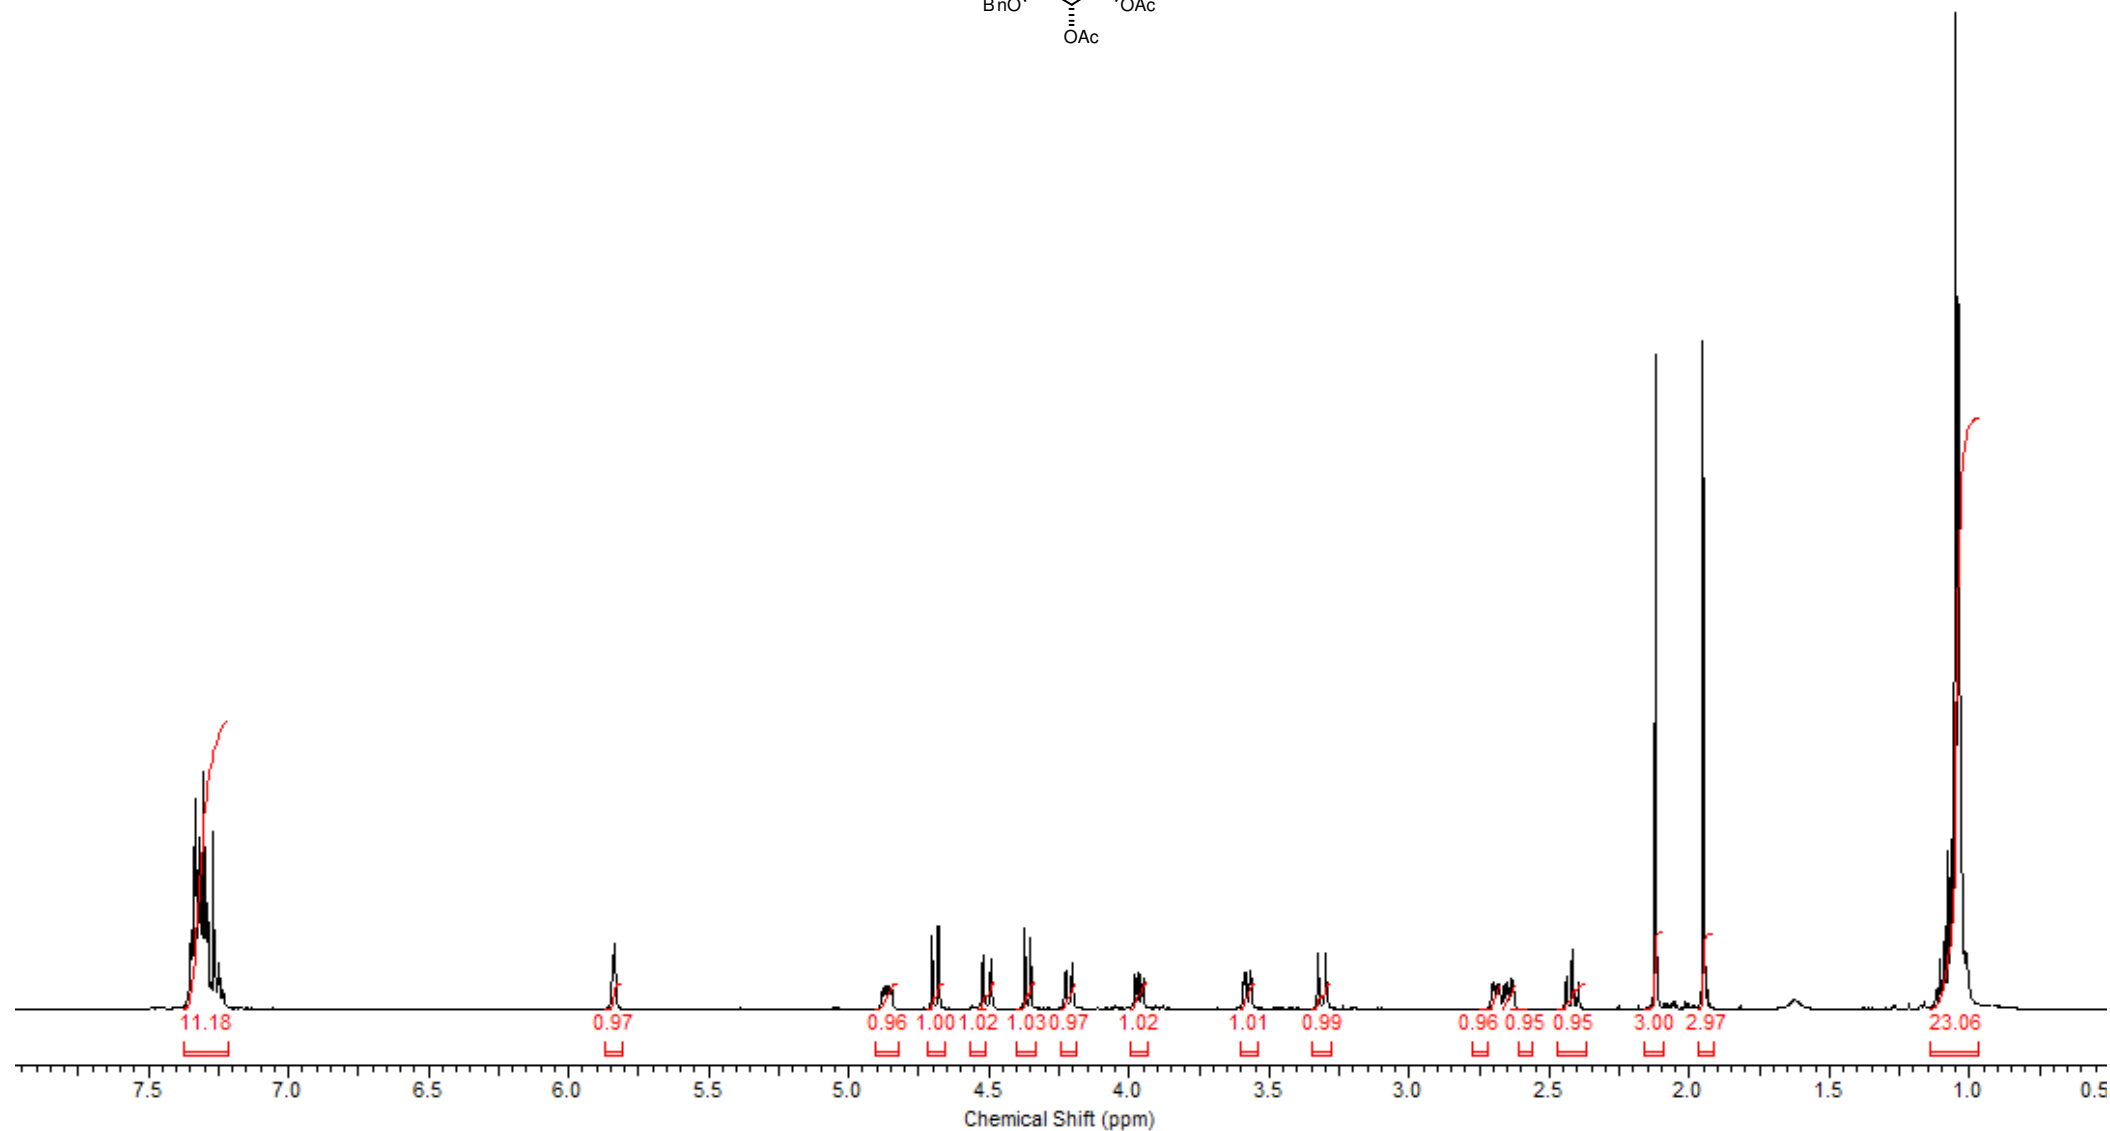

**(2*R*,3*R*,4*S*,5*S*)-*N*(1)-Benzyl-2-[(triisopropylsilyloxy)methyl]-3-benzyloxy-4,5-diacetoxypiperidine 24** (100 MHz <sup>13</sup>C, CDCl<sub>3</sub>)

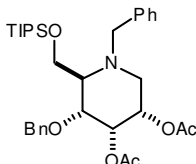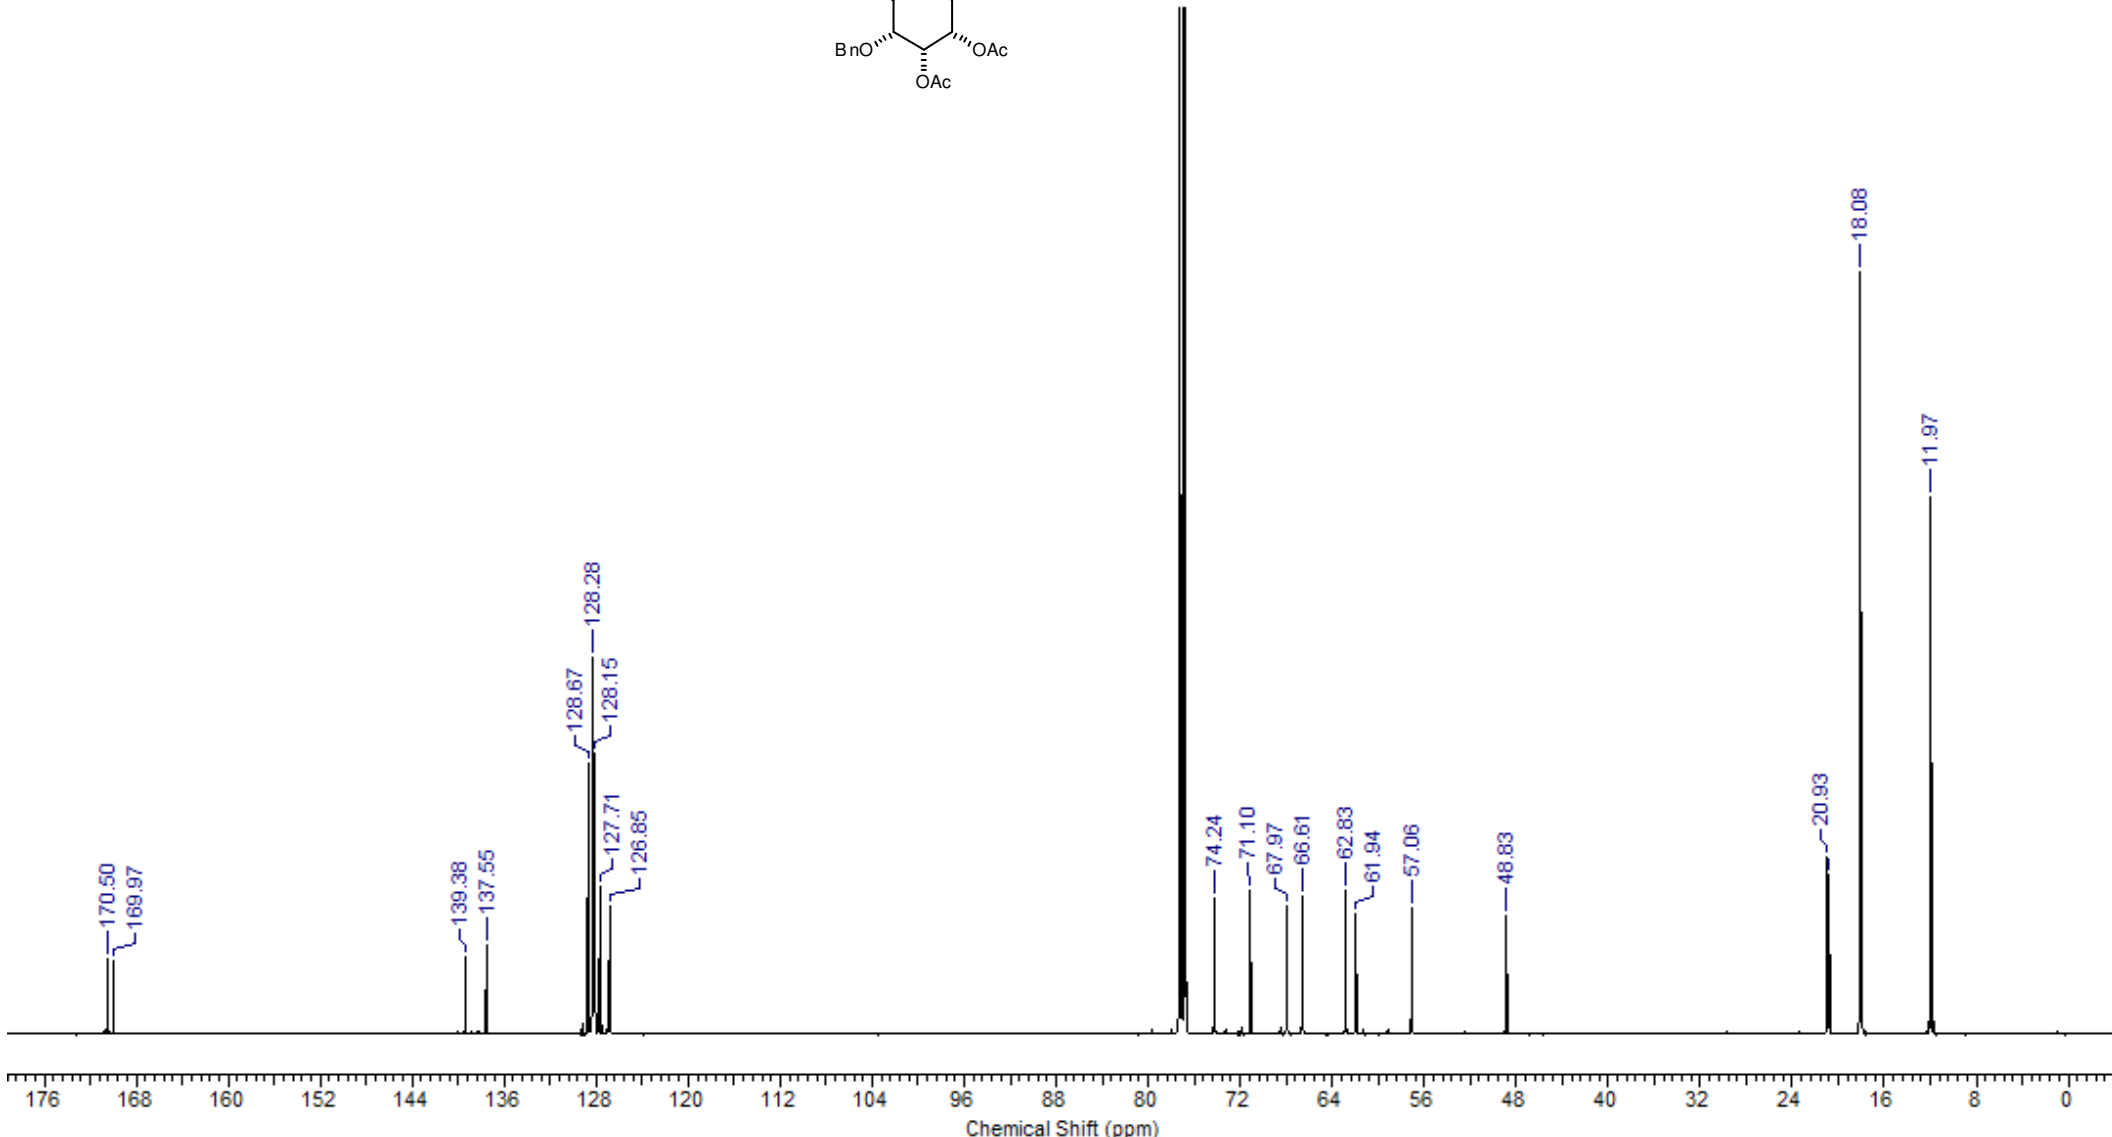

**(2*R*,3*R*,4*S*,5*S*)-*N*(1)-Benzyl-2-(hydroxymethyl)-3-benzyloxy-4,5-dihydropiperidine 25 (400 MHz  $^1\text{H}$ ,  $\text{CDCl}_3$ )**

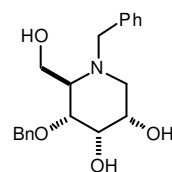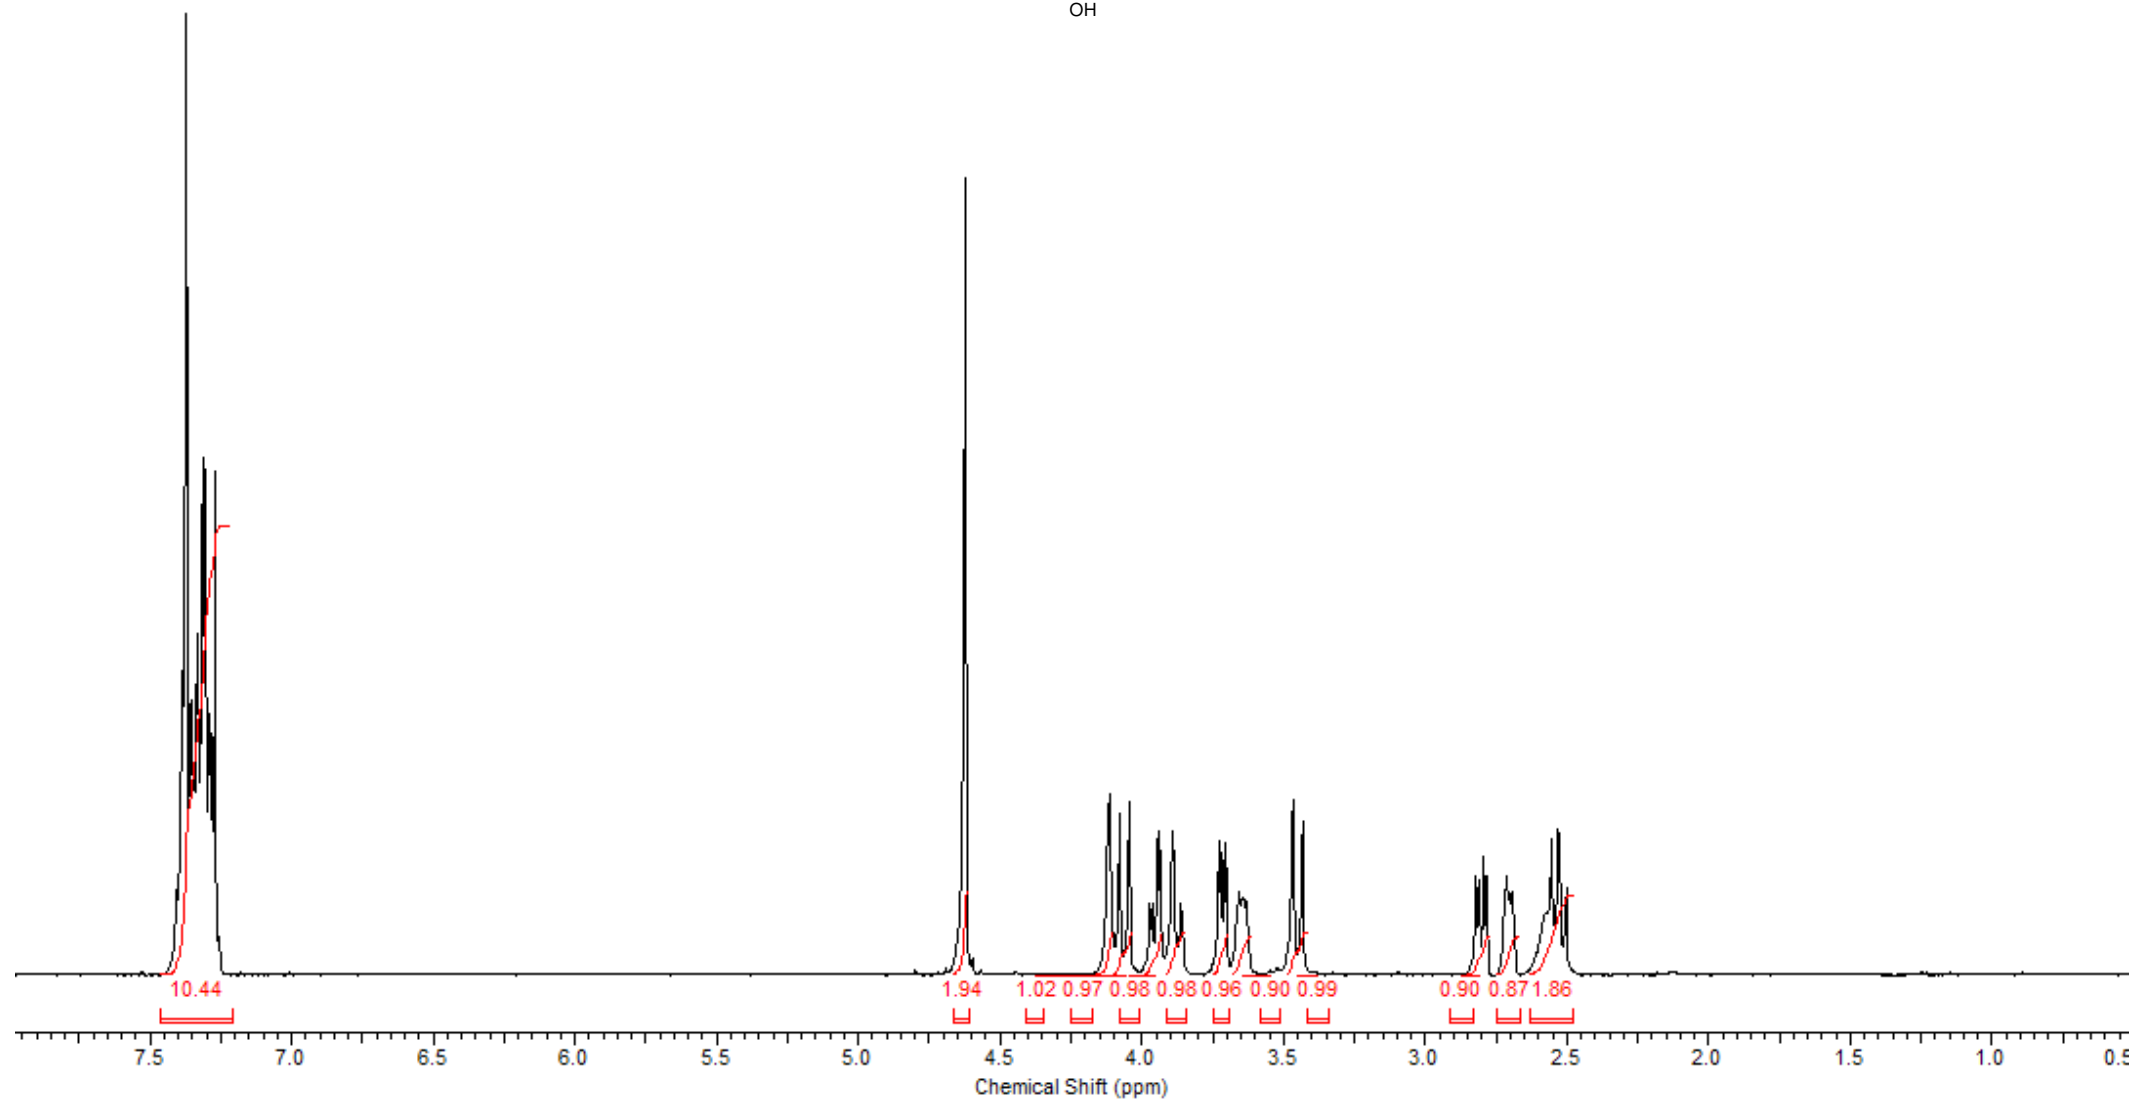

**(2*R*,3*R*,4*S*,5*S*)-*N*(1)-Benzyl-2-(hydroxymethyl)-3-benzyloxy-4,5-dihydropiperidine 25** (100 MHz  $^{13}\text{C}$ ,  $\text{CDCl}_3$ )

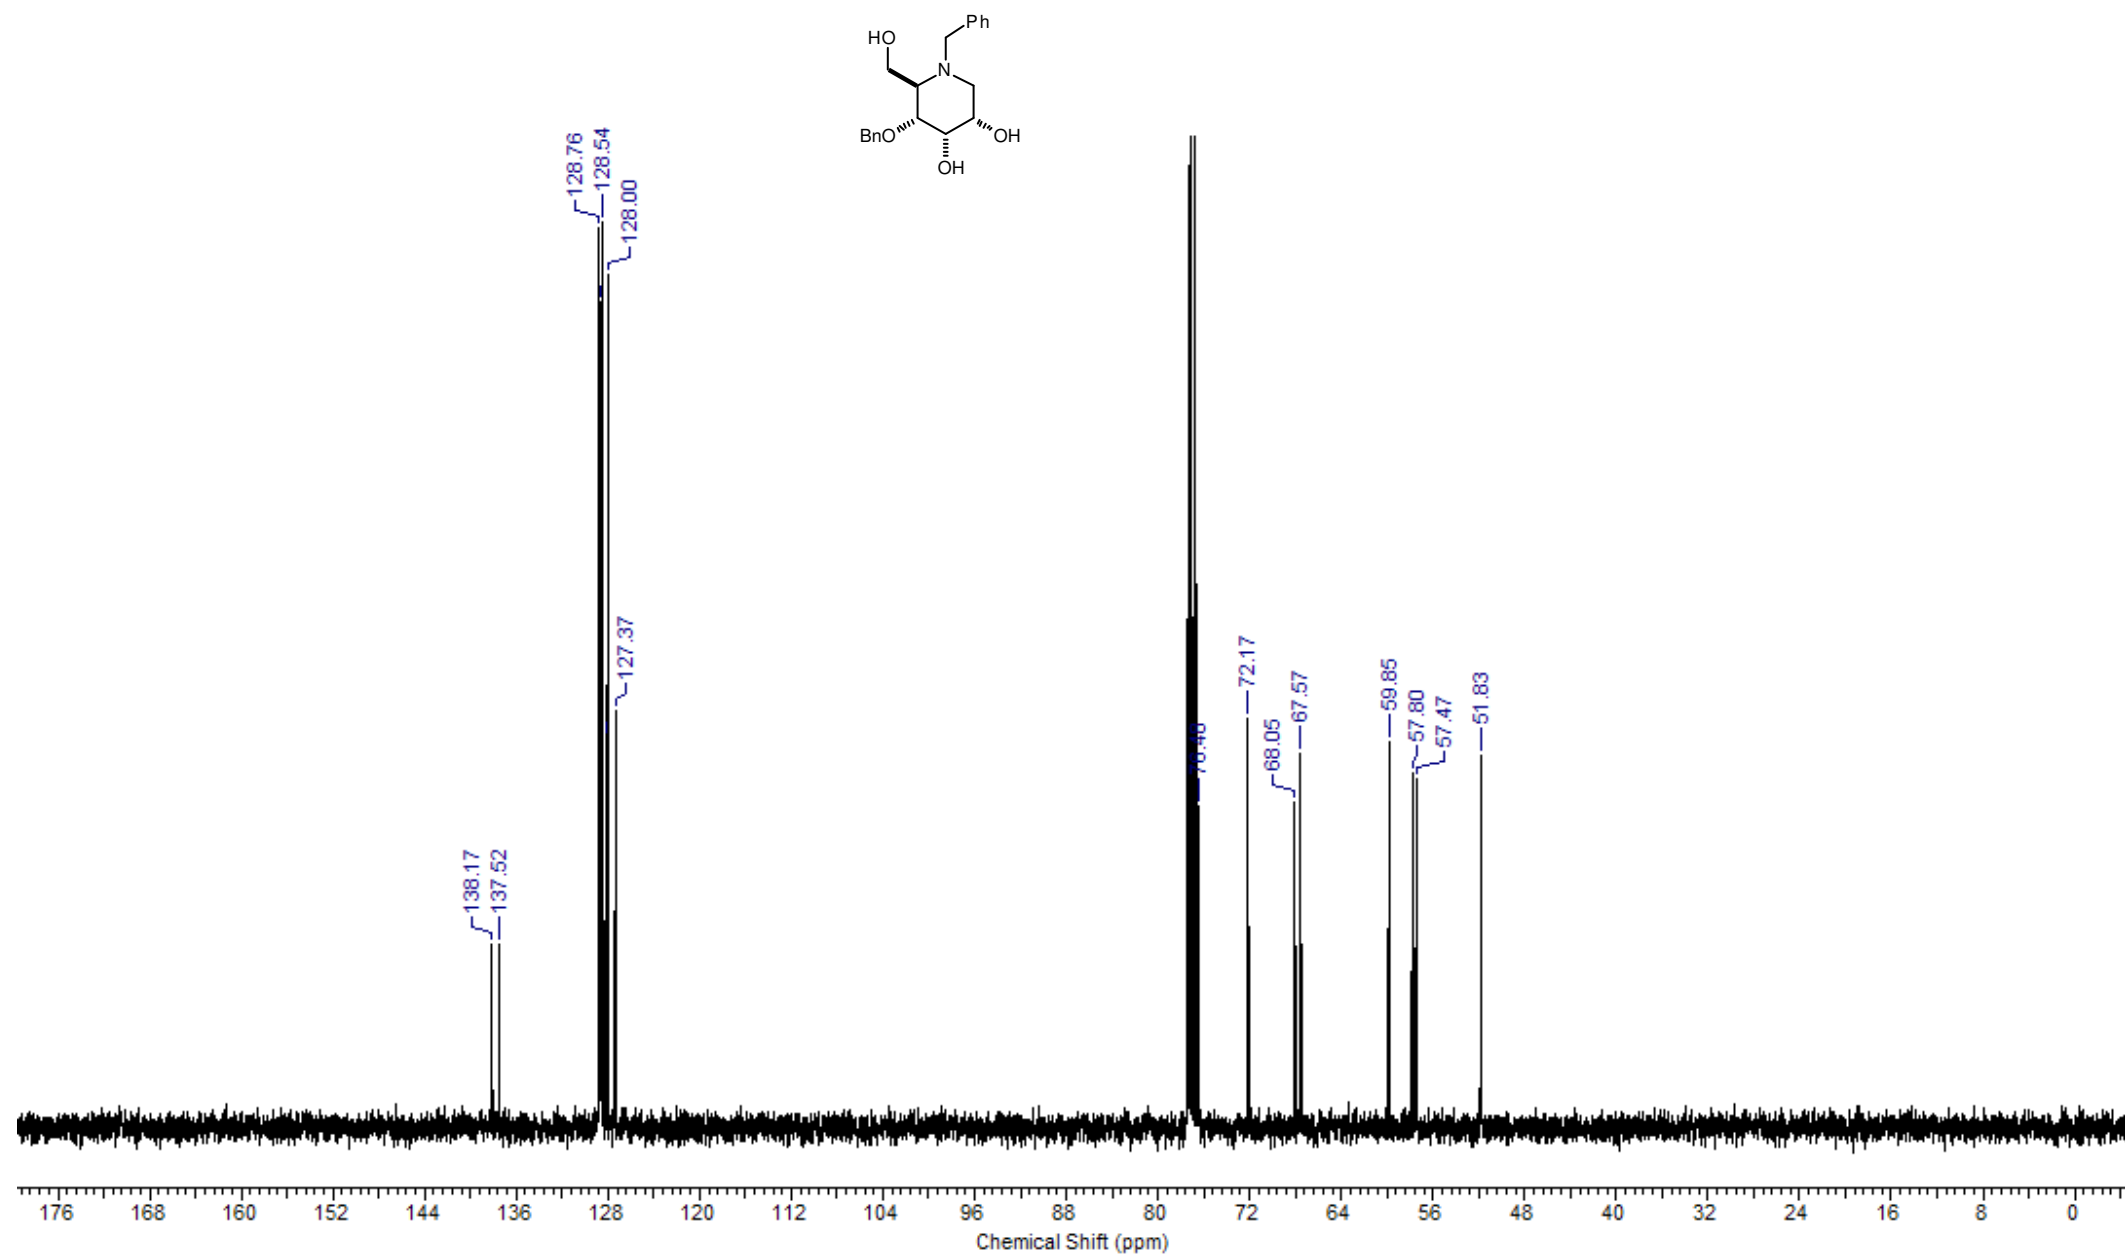

**(2*S*,3*S*,4*R*,5*R*)-1,5-Dideoxy-1,5-imino-D-allose [(+)-1-deoxyallonojirimycin] 26** (400 MHz  $^1\text{H}$ ,  $\text{D}_2\text{O}$ )

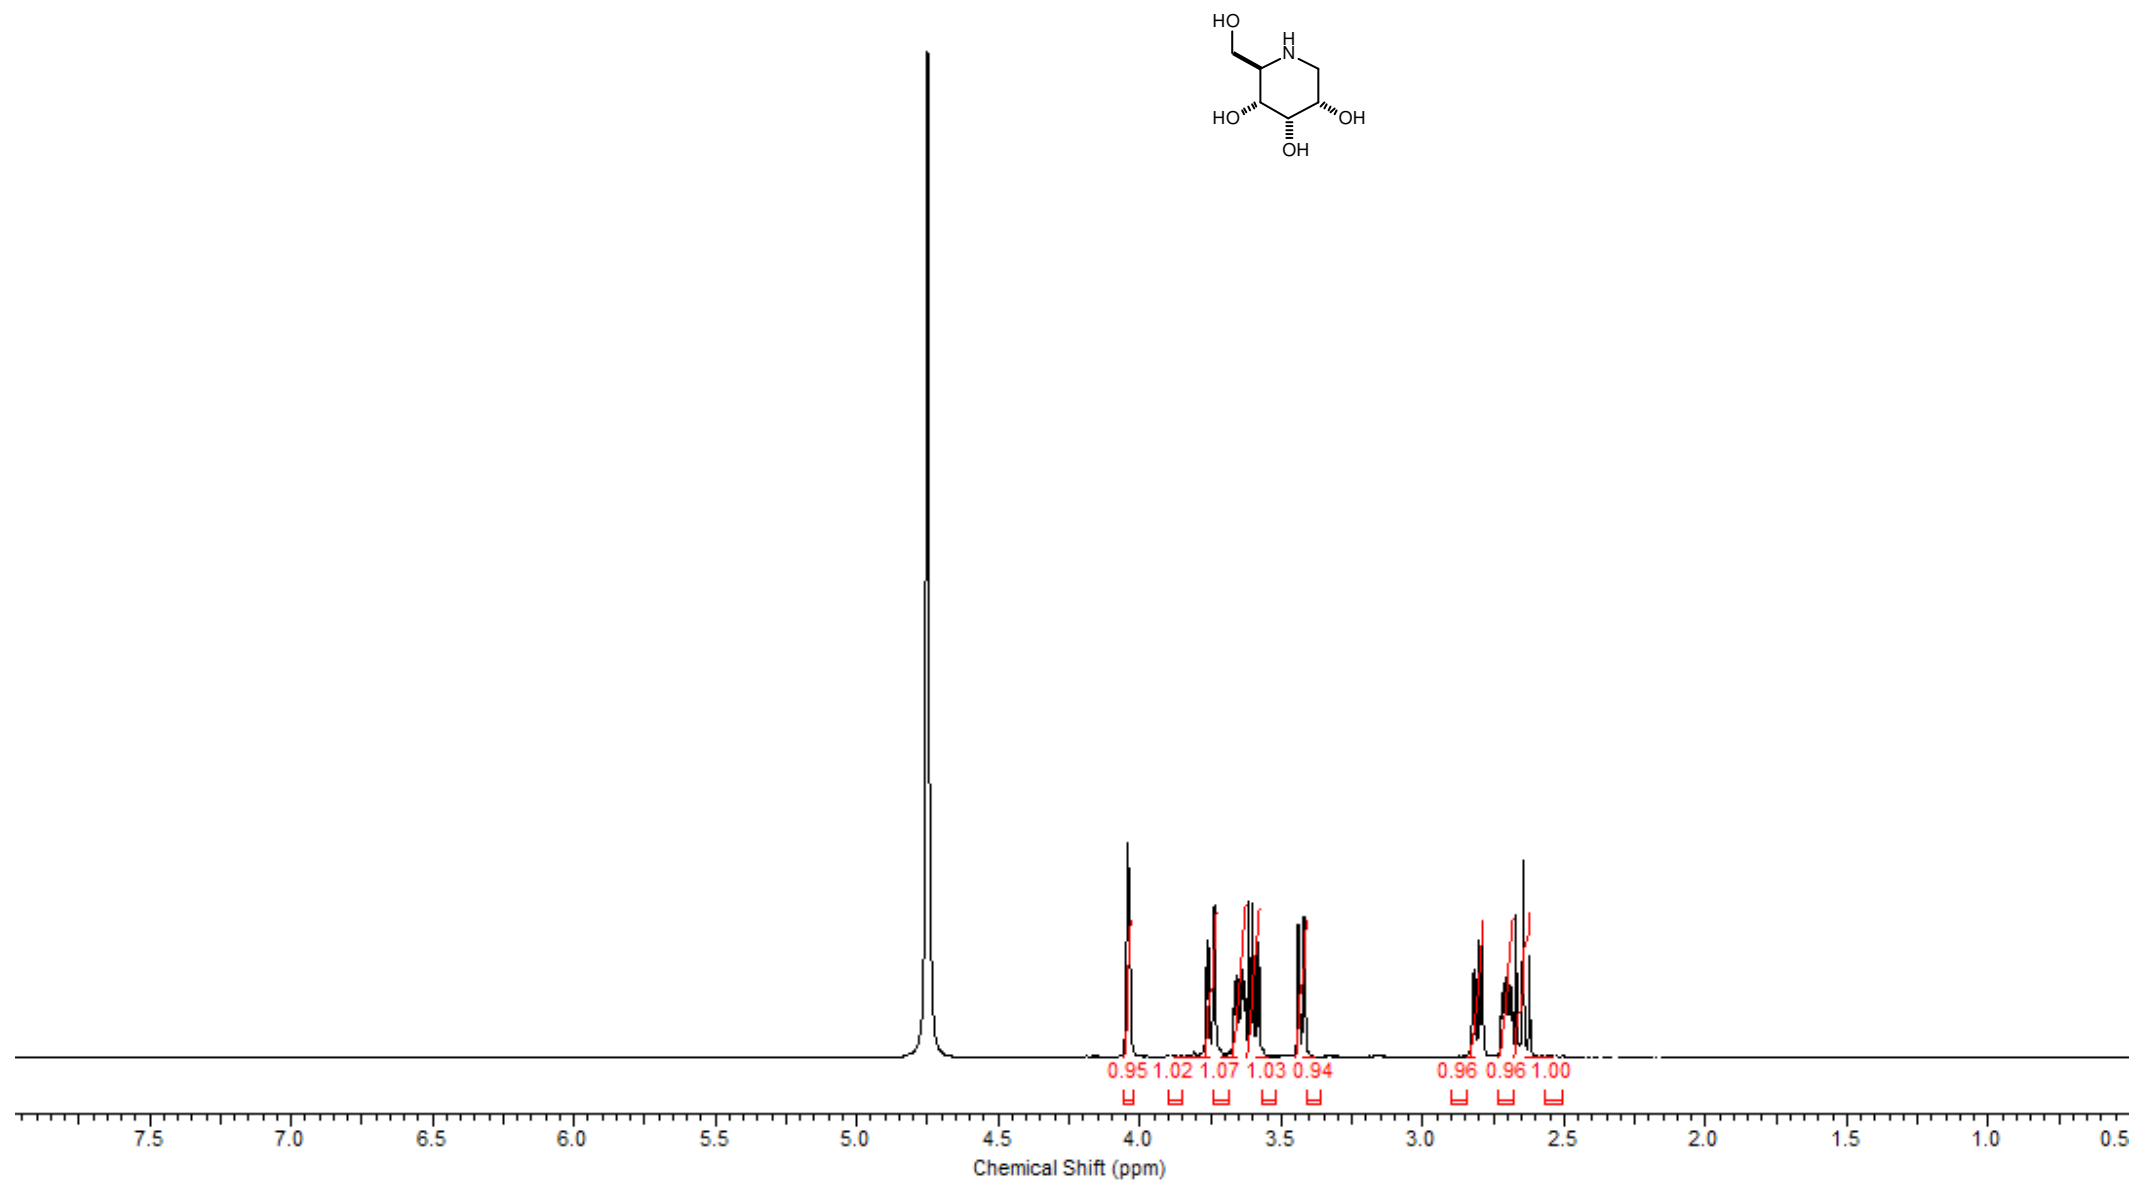

(2*S*,3*S*,4*R*,5*R*)-1,5-Dideoxy-1,5-imino-D-allose [(+)-1-deoxyallonojirimycin] 26 (100 MHz  $^{13}\text{C}$ ,  $\text{D}_2\text{O}$ )

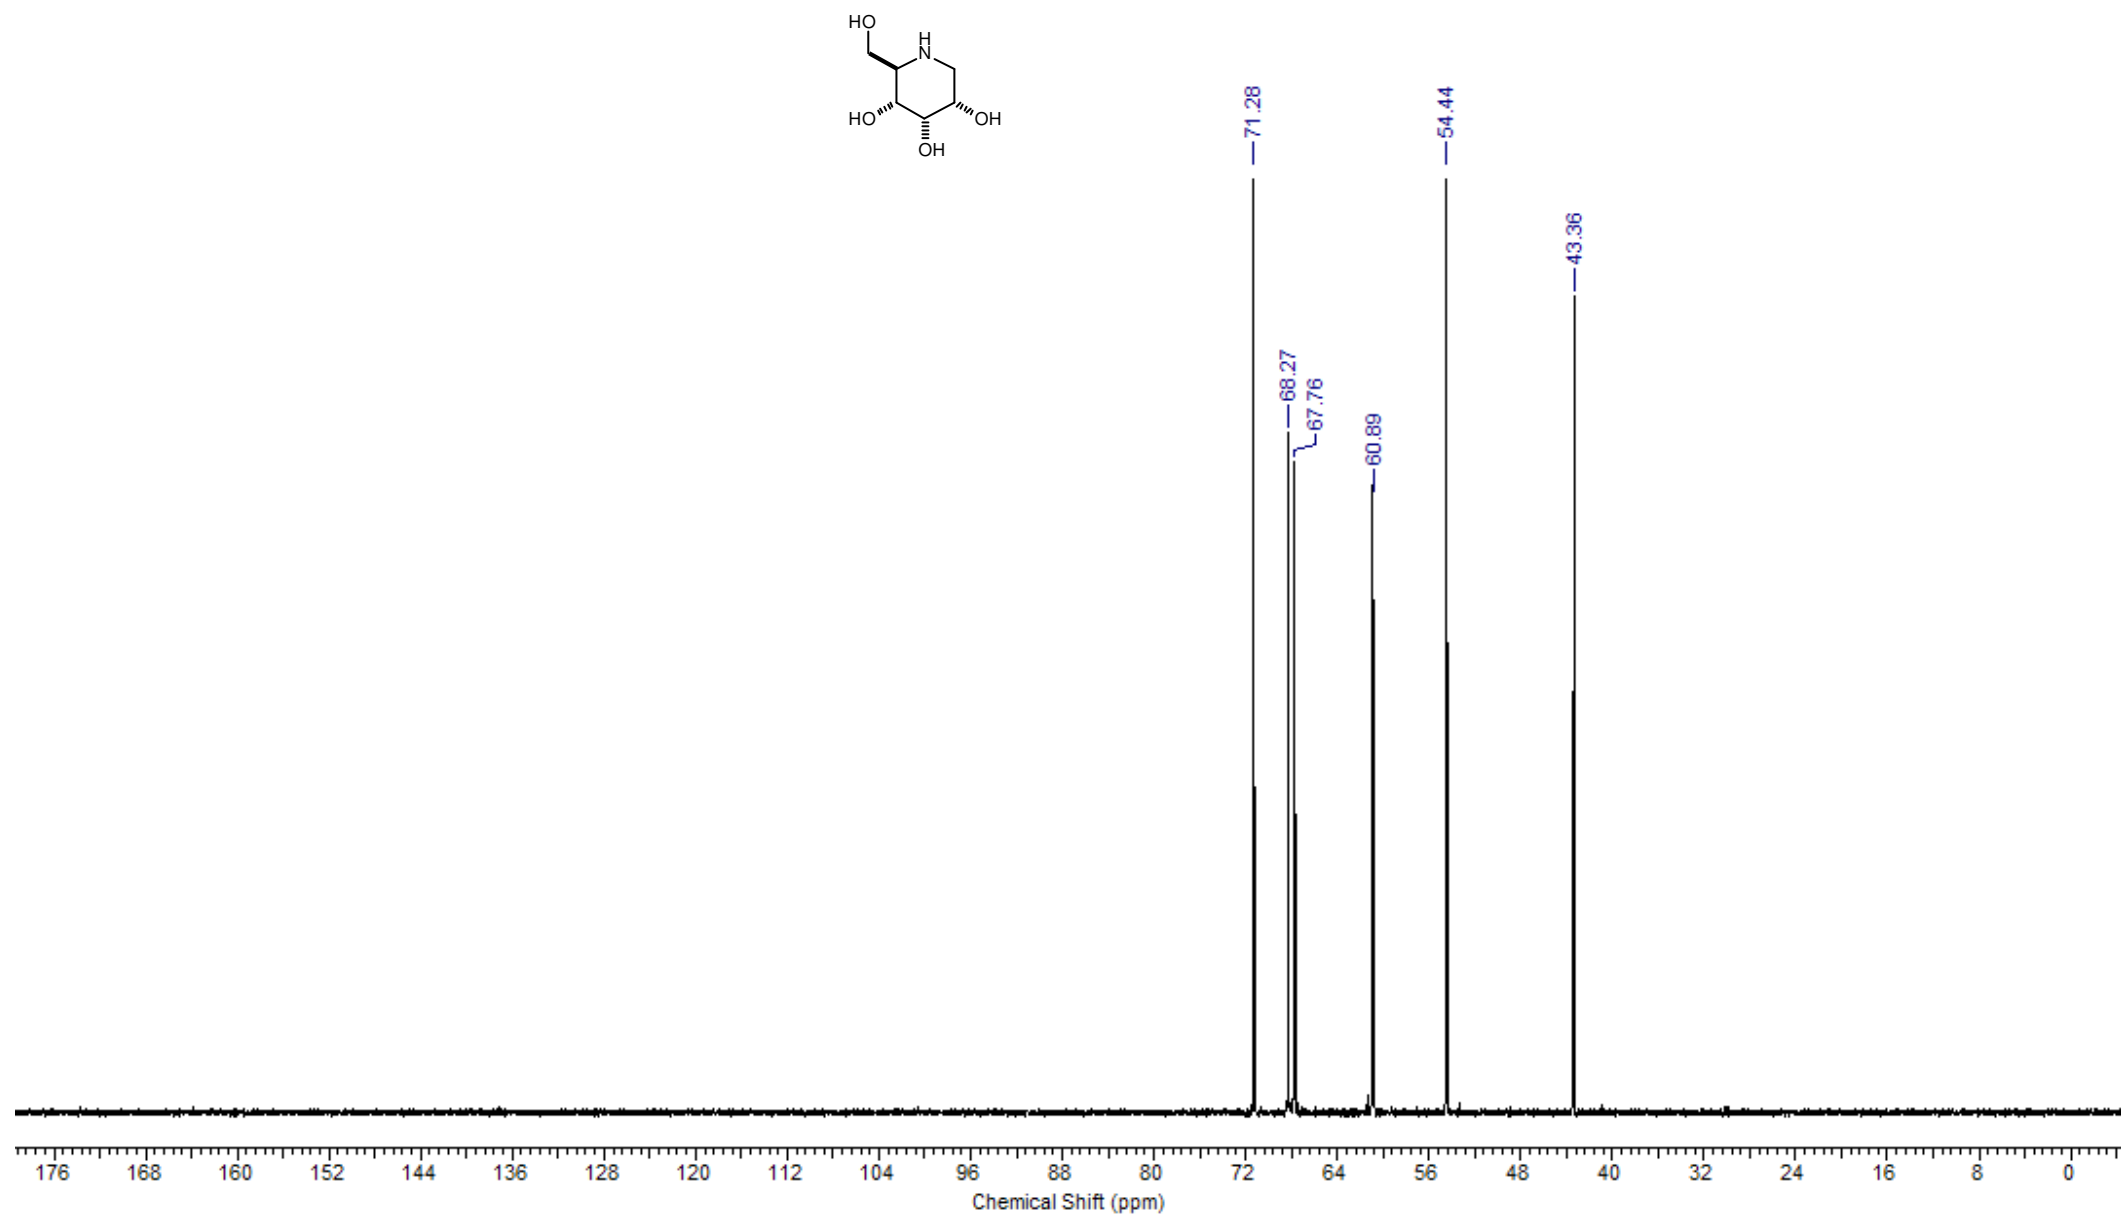

Supplement: Supplementary file 1 [file 4064668]
